# Supplementary material for: Oxidative 1,2-carboamination of alkenes with alkyl nitriles and amines toward γ-amino alkyl nitriles
Source: PubMed Central journal article supplement (PMC5394231; doi:10.1038/ncomms14720), 2017-04-10
Supplement: ncomms14720-s1.pdf [file ncomms14720-s1.pdf]

## Supplementary Methods

### 1. Materials

Substrates **1i**<sup>1</sup>, **1m**<sup>2</sup>, **1n**<sup>3</sup>, **1p**<sup>4</sup>, **1r**<sup>5</sup>, **1s**<sup>6</sup>, and **1t**<sup>7</sup> were prepared according to literature procedures. Other alkenes, amines and nitriles were purchased from commercial sources and were used as received.

### 2. General Procedures for Silver-Mediated Intermolecular 1,2-Carboamination of Alkenes with Nitriles and Amines:

To a Schlenk tube were added Fe(OTf)<sub>3</sub> or FeCl<sub>3</sub> (10 mol%), Ag<sub>2</sub>CO<sub>3</sub> (0.6 mmol), alkene **1** (0.3 mmol), amine **3** (0.6mmol) and MeCN (2 mL). Then the tube was recharged with argon, and the mixture was stirred at 120 °C for 24 hours. After cooling to room temperature, the mixture was filtered through a small plug of silica gel to remove the precipitate and washed with with EtOAc (3×10 mL). The solvent was then removed in vacuo and the residue was further purified by silica gel flash column chromatography (10-40% ethyl acetate/hexane + 0.1% Et<sub>3</sub>N) to afford the desired product.

### 3. Analytical data for 4-15, 17-26, 28-29 and 31-44

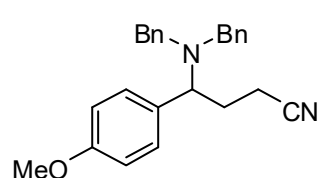

**4-(Dibenzylamino)-4-(4-methoxyphenyl)butanenitrile**

**(4):** Light yellow solid; mp 140.3-140.9 °C (uncorrected);  
<sup>1</sup>H NMR (400 MHz, CDCl<sub>3</sub>) δ: 7.36-7.31 (m, 8H), 7.26-7.22 (m, 2H), 7.13 (d, *J* = 8.0 Hz, 2H), 6.94 (d, *J* = 8.0 Hz, 2H), 3.84 (s, 3H), 3.79 (d, *J* = 13.6 Hz, 2H), 3.69 (t, *J* = 7.6 Hz, 1H), 3.10 (d, *J* = 14.0 Hz, 2H), 2.54-2.47 (m, 1H), 2.42-2.24 (m, 2H), 2.03-1.94 (m, 1H); <sup>13</sup>C NMR (100 MHz,

CDCl<sub>3</sub>)  $\delta$ : 159.0, 139.5, 129.8, 128.7, 128.6, 128.4, 127.1, 119.8, 113.6, 60.4, 55.2, 53.7, 28.1, 14.8; LRMS (EI, 70 eV)  $m/z$  (%): 370 (M<sup>+</sup>, 2), 316 (93), 174 (19), 134 (22), 91 (100); HRMS  $m/z$  (ESI) calcd for C<sub>25</sub>H<sub>27</sub>N<sub>2</sub>O (M+H)<sup>+</sup> 371.2118, found 371.2124.

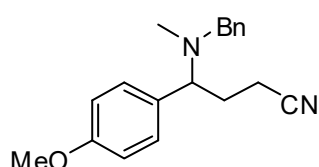

**4-(Benzyl(methyl)amino)-4-(4-methoxyphenyl)butanenitrile**

**(5):** Light yellow oil; <sup>1</sup>H NMR (400 MHz, CDCl<sub>3</sub>)  $\delta$ : 7.33-7.22 (m, 5H), 7.16 (d,  $J$  = 8.0 Hz, 2H), 6.91 (d,  $J$  = 8.4 Hz, 2H), 3.81 (s, 3H), 3.63 (t,  $J$  = 7.2 Hz, 1H), 3.50 (d,  $J$  = 13.6 Hz, 1H), 3.10 (d,  $J$  = 13.2 Hz, 1H), 2.44-2.29 (m, 3H), 2.07 (s, 3H), 2.01-1.93 (m, 1H); <sup>13</sup>C NMR (100 MHz, CDCl<sub>3</sub>)  $\delta$ : 159.0, 139.3, 129.5, 129.3, 128.6, 128.2, 126.9, 119.9, 113.6, 65.4, 58.7, 55.2, 37.2, 28.3, 14.6; LRMS (EI, 70 eV)  $m/z$  (%): 294 (M<sup>+</sup>, 2), 240 (98), 174 (17), 134 (24), 91 (100); HRMS  $m/z$  (ESI) calcd for C<sub>19</sub>H<sub>23</sub>N<sub>2</sub>O (M+H)<sup>+</sup> 295.1805, found 295.1813.

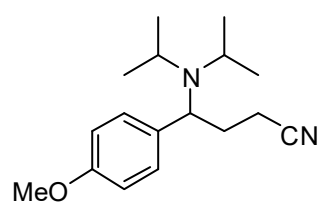

**4-(Diisopropylamino)-4-(4-methoxyphenyl)butanenitrile**

**(6):** Colorless oil; <sup>1</sup>H NMR (400 MHz, CDCl<sub>3</sub>)  $\delta$ : 7.23 (d,  $J$  = 8.4 Hz, 2H), 6.83 (d,  $J$  = 8.4 Hz, 2H), 3.89 (t,  $J$  = 7.6 Hz, 1H), 3.80 (s, 3H), 3.27-3.17 (m, 2H), 2.37-2.22 (m, 2H), 2.19-2.09 (m, 1H), 2.05-1.96 (m, 1H), 1.09 (d,  $J$  = 6.8 Hz, 6H), 0.85 (d,  $J$  = 6.4 Hz, 6H); <sup>13</sup>C NMR (100 MHz, CDCl<sub>3</sub>)  $\delta$ : 158.4, 134.6, 129.3, 120.2, 113.5, 56.6, 55.2, 45.1, 30.4, 23.8, 22.1, 15.1; LRMS (EI, 70 eV)  $m/z$  (%): 274 (M<sup>+</sup>, 6), 259 (4), 220 (53), 174 (100), 134 (38); HRMS  $m/z$  (ESI) calcd for C<sub>17</sub>H<sub>27</sub>N<sub>2</sub>O (M+H)<sup>+</sup> 275.2118, found 275.2126.

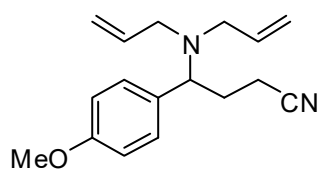

**4-(Diallylamino)-4-(4-methoxyphenyl)butanenitrile (7):**

Colorless oil;  $^1\text{H NMR}$  (400 MHz,  $\text{CDCl}_3$ )  $\delta$ : 7.11 (d,  $J = 8.0$  Hz, 2H), 6.88 (d,  $J = 8.0$  Hz, 2H), 5.86-5.76 (m, 2H), 5.20-5.14 (m, 4H), 3.84-3.81 (m, 4H), 3.25 (dd,  $J = 2.8, 14.4$  Hz, 2H), 2.68 (dd,  $J = 7.6, 14.4$  Hz, 2H), 2.47-2.37 (m, 2H), 2.35-2.24 (m, 1H), 1.98-1.89 (m, 1H);  $^{13}\text{C NMR}$  (100 MHz,  $\text{CDCl}_3$ )  $\delta$ : 158.9, 136.5, 129.5, 119.9, 117.2, 113.6, 60.8, 55.2, 52.5, 28.3, 14.7; LRMS (EI, 70 eV)  $m/z$  (%): 270 ( $\text{M}^+$ , 2), 216 (100), 174 (29), 134 (35), 121 (9); HRMS  $m/z$  (ESI) calcd for  $\text{C}_{17}\text{H}_{23}\text{N}_2\text{O}$  ( $\text{M}+\text{H}$ ) $^+$  271.1805, found 271.1800.

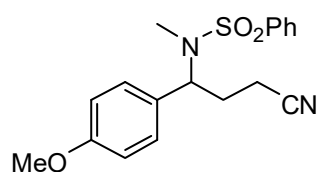

***N*-(3-Cyano-1-(4-methoxyphenyl)propyl)-*N*-methylbenzenesulfonamide (8):**

Light yellow oil;  $^1\text{H NMR}$  (400 MHz,  $\text{CDCl}_3$ )  $\delta$ : 7.78 (d,  $J = 8.0$  Hz, 2H), 7.60-7.48 (m, 3H), 6.92 (d,  $J = 8.4$  Hz, 2H), 6.74 (d,  $J = 8.4$  Hz, 2H), 5.04 (t,  $J = 8.0$  Hz, 1H), 3.76 (s, 3H), 2.61 (s, 3H), 2.42 (t,  $J = 7.2$  Hz, 2H), 2.19 (q,  $J = 7.2$  Hz, 2H);  $^{13}\text{C NMR}$  (100 MHz,  $\text{CDCl}_3$ )  $\delta$ : 159.4, 139.7, 132.6, 129.1, 129.0, 127.8, 127.0, 119.0, 113.9, 58.6, 55.2, 29.0, 27.1, 14.8; LRMS (EI, 70 eV)  $m/z$  (%): 344 ( $\text{M}^+$ , 2), 290 (100), 203 (48), 174 (98), 148 (77), 134 (64); HRMS  $m/z$  (ESI) calcd for  $\text{C}_{18}\text{H}_{21}\text{N}_2\text{O}_3\text{S}$  ( $\text{M}+\text{H}$ ) $^+$  345.1267, found 345.1277.

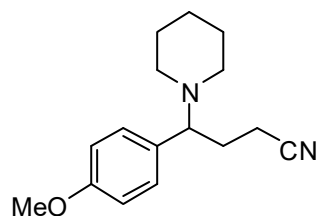

**4-(4-Methoxyphenyl)-4-(piperidin-1-yl)butanenitrile (9):**

Colorless oil;  $^1\text{H NMR}$  (400 MHz,  $\text{CDCl}_3$ )  $\delta$ : 7.09 (d,  $J = 8.4$  Hz, 2H), 6.87 (d,  $J = 8.4$  Hz, 2H), 3.81 (s, 3H), 3.44 (t,  $J = 7.2$  Hz, 1H), 2.41-2.24 (m, 7H), 1.99-1.91 (m, 1H), 1.58-1.47 (m, 4H), 1.37-1.30 (m, 2H);  $^{13}\text{C NMR}$  (100 MHz,  $\text{CDCl}_3$ )  $\delta$ : 158.9, 129.7, 129.5, 120.0, 113.5, 67.7, 55.2,

50.8, 28.0, 26.3, 24.5, 14.5; LRMS (EI, 70 eV)  $m/z$  (%): 258 ( $M^+$ , 2), 204 (100), 174(10), 134 (19) 121 (11); HRMS  $m/z$  (ESI) calcd for  $C_{16}H_{23}N_2O$  ( $M+H$ )<sup>+</sup> 259.1805, found 259.1816.

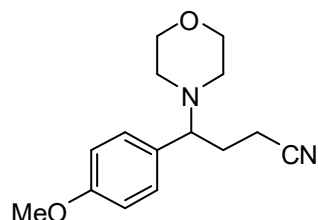

**4-(4-Methoxyphenyl)-4-morpholinobutanenitrile (10):**

Colorless oil; <sup>1</sup>H NMR (400 MHz, CDCl<sub>3</sub>)  $\delta$ : 7.13 (d,  $J$  = 8.0 Hz, 2H), 6.88 (d,  $J$  = 8.4 Hz, 2H), 3.81 (s, 3H), 3.67 (t,  $J$  = 4.4 Hz, 4H), 3.37 (t,  $J$  = 7.2 Hz, 1H), 2.39 (brs, 4H), 2.36-2.25 (m, 2H), 2.21-2.13 (m, 1H), 1.99-1.89 (m, 1H); <sup>13</sup>C NMR (100 MHz, CDCl<sub>3</sub>)  $\delta$ : 159.2, 129.6, 129.4, 119.6, 113.8, 67.8, 67.0, 55.2, 50.6, 27.9, 14.3; LRMS (EI, 70 eV)  $m/z$  (%): 260 ( $M^+$ , 3), 206 (100), 174 (24), 134 (28), 119 (6); HRMS  $m/z$  (ESI) calcd for  $C_{15}H_{21}N_2O_2$  ( $M+H$ )<sup>+</sup> 261.1598, found 261.1612.

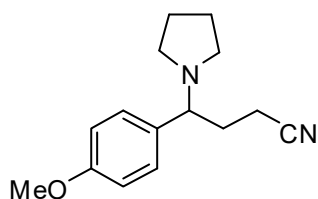

**4-(4-Methoxyphenyl)-4-(pyrrolidin-1-yl)butanenitrile (11):**

Colorless oil; <sup>1</sup>H NMR (400 MHz, CDCl<sub>3</sub>)  $\delta$ : 7.21 (d,  $J$  = 8.0 Hz, 2H), 6.87 (d,  $J$  = 8.4 Hz, 2H), 3.81 (s, 3H), 3.20 (t,  $J$  = 4.8 Hz, 1H), 2.55-2.50 (m, 2H), 2.39-2.36 (m, 2H), 2.29-2.17 (m, 2H), 2.04-1.95 (m, 2H), 1.79-1.69 (m, 4H); <sup>13</sup>C NMR (100 MHz, CDCl<sub>3</sub>)  $\delta$ : 159.0, 132.6, 128.9, 119.7, 113.9, 68.2, 55.2, 52.4, 31.2, 23.2, 13.9; LRMS (EI, 70 eV)  $m/z$  (%): 244 ( $M^+$ , 1), 190 (100), 174 (7), 134 (14), 121 (7); HRMS  $m/z$  (ESI) calcd for  $C_{15}H_{21}N_2O$  ( $M+H$ )<sup>+</sup> 245.1648, found 245.1661.

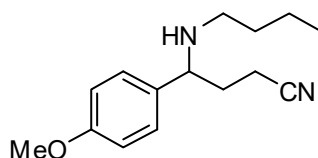

**4-(Butylamino)-4-(4-methoxyphenyl)butanenitrile (12):**

Light yellow oil; <sup>1</sup>H NMR (400 MHz, CDCl<sub>3</sub>)  $\delta$ : 7.19 (d,  $J$  = 8.0 Hz, 2H), 6.89 (d,  $J$  = 8.4 Hz, 2H), 3.81 (s, 3H), 3.65 (t,  $J$  = 6.4 Hz, 1H),

2.47-2.41 (m, 2H), 2.39-2.31 (m, 1H), 2.20-2.12 (m, 1H), 2.07-1.98 (m, 1H), 1.93-1.84 (m, 1H), 1.48-1.25 (m, 5H), 0.87 (t,  $J = 7.2$  Hz, 3H);  $^{13}\text{C}$  NMR (100 MHz,  $\text{CDCl}_3$ )  $\delta$ : 159.0, 134.2, 128.0, 119.8, 114.1, 61.2, 55.3, 47.2, 33.2, 32.3, 20.4, 14.1, 14.0; LRMS (EI, 70 eV)  $m/z$  (%): 246 ( $\text{M}^+$ , 1), 192 (100), 174 (26), 134 (22), 121 (6); HRMS  $m/z$  (ESI) calcd for  $\text{C}_{15}\text{H}_{23}\text{N}_2\text{O}$  ( $\text{M}+\text{H}$ ) $^+$  247.1805, found 247.1817.

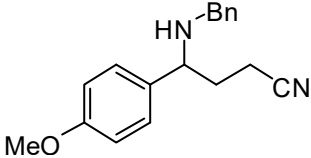 **4-(Benzylamino)-4-(4-methoxyphenyl)butanenitrile (13):** Light yellow oil;  $^1\text{H}$  NMR (400 MHz,  $\text{CDCl}_3$ )  $\delta$ : 7.33-7.30 (m, 7H), 6.91 (d,  $J = 8.0$  Hz, 2H), 3.82 (s, 3H), 3.70-3.63 (m, 2H), 3.55 (d,  $J = 13.2$  Hz, 1H), 2.39-2.17 (m, 2H), 2.06-1.87 (m, 2H), 1.57 (s, 1H);  $^{13}\text{C}$  NMR (100 MHz,  $\text{CDCl}_3$ )  $\delta$ : 159.1, 140.1, 133.7, 128.4, 128.1, 128.0, 127.0, 119.7, 114.1, 60.3, 55.2, 51.3, 33.3, 14.1; LRMS (EI, 70 eV)  $m/z$  (%): 280 ( $\text{M}^+$ , 1), 226 (83), 174 (5), 134 (14), 91 (100); HRMS  $m/z$  (ESI) calcd for  $\text{C}_{18}\text{H}_{21}\text{N}_2\text{O}$  ( $\text{M}+\text{H}$ ) $^+$  281.1648, found 281.1641.

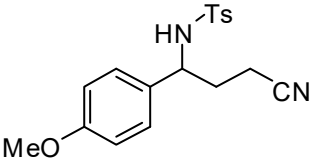 **N-(3-Cyano-1-(4-methoxyphenyl)propyl)-4-methylbenzenesulfonamide (14):** Colorless oil;  $^1\text{H}$  NMR (400 MHz,  $\text{CDCl}_3$ )  $\delta$ : 7.57 (d,  $J = 7.6$  Hz, 2H), 7.16 (d,  $J = 8.0$  Hz, 2H), 6.89 (d,  $J = 8.4$  Hz, 2H), 6.69 (d,  $J = 8.4$  Hz, 2H), 5.49 (d,  $J = 7.2$  Hz, 1H), 4.24 (q,  $J = 7.6$  Hz, 1H), 3.74 (s, 3H), 2.38 (s, 3H), 2.42-2.25 (m, 2H), 2.23-2.13 (m, 1H), 2.05-1.94 (m, 1H);  $^{13}\text{C}$  NMR (100 MHz,  $\text{CDCl}_3$ )  $\delta$ : 159.3, 143.4, 137.0, 130.7, 129.5, 127.5, 127.0, 118.9, 114.2, 56.6, 55.2, 32.8, 21.4, 14.3; LRMS (EI, 70 eV)  $m/z$  (%): 344 ( $\text{M}^+$ , 3), 290 (100), 189 (36), 155 (59), 134 (45); HRMS  $m/z$  (ESI) calcd for  $\text{C}_{18}\text{H}_{21}\text{N}_2\text{O}_3\text{S}$  ( $\text{M}+\text{H}$ ) $^+$  345.1267, found 345.1259.

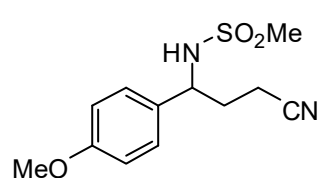

***N*-(3-Cyano-1-(4-methoxyphenyl)propyl)methanesulfon**

**amide (15):** Colorless oil;  $^1\text{H}$  NMR (400 MHz,  $\text{CDCl}_3$ )  $\delta$ : 7.24 (d,  $J = 8.0$  Hz, 2H), 6.93 (d,  $J = 8.0$  Hz, 2H), 5.28 (d,  $J = 8.0$  Hz, 1H), 4.46 (q,  $J = 8.0$  Hz, 1H), 3.82 (s, 3H), 2.63 (s, 3H), 2.47-2.32 (m, 2H), 2.26-2.17 (m, 1H), 2.10-2.01 (m, 1H);  $^{13}\text{C}$  NMR (100 MHz,  $\text{CDCl}_3$ )  $\delta$ : 159.8, 131.2, 127.6, 118.9, 114.7, 56.8, 55.3, 41.7, 33.0, 14.5; LRMS (EI, 70 eV)  $m/z$  (%): 268 ( $\text{M}^+$ , 10), 214 (100), 187 (16), 134 (61), 108 (24); HRMS  $m/z$  (ESI) calcd for  $\text{C}_{12}\text{H}_{17}\text{N}_2\text{O}_3\text{S}$  ( $\text{M}+\text{H}$ ) $^+$  269.0954, found 269.0943.

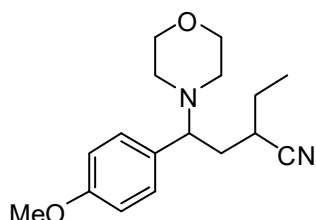

**2-Ethyl-4-(4-methoxyphenyl)-4-morpholinobutanenitrile**

**(17):** Colorless oil; d.r. = 1.3:1;  $^1\text{H}$  NMR (400 MHz,  $\text{CDCl}_3$ )  $\delta$ : 7.18 (d,  $J = 7.6$  Hz, 2H), 7.09 (d,  $J = 7.6$  Hz, 2H), 6.90-6.87 (m, 4H), 3.81 (s, 6H), 3.67-3.61 (m, 9H), 3.48-3.42 (m, 1H), 2.81-2.73 (m, 1H), 2.42-2.06 (m, 11H), 1.90-1.74 (m, 2H), 1.71-1.55 (m, 4H), 1.09 (t,  $J = 7.2$  Hz, 3H), 1.01 (t,  $J = 7.2$  Hz, 3H);  $^{13}\text{C}$  NMR (100 MHz,  $\text{CDCl}_3$ )  $\delta$ : 159.2, 159.1, 130.2, 129.6, 129.4, 128.7, 122.2, 121.9, 113.9, 113.5, 67.6, 67.2, 67.0, 66.1, 55.2, 51.0, 49.7, 35.0, 33.7, 30.7, 30.4, 25.9, 25.3, 11.5, 11.4; LRMS (EI, 70 eV)  $m/z$  (%): 288 ( $\text{M}^+$ , 2), 206 (100), 134 (26), 121 (12); HRMS  $m/z$  (ESI) calcd for  $\text{C}_{17}\text{H}_{25}\text{N}_2\text{O}_2$  ( $\text{M}+\text{H}$ ) $^+$  289.1911, found 289.1925.

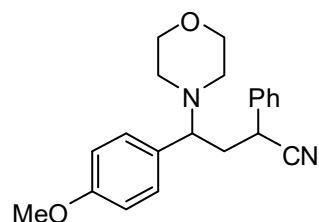

**4-(4-Methoxyphenyl)-4-morpholino-2-phenylbutanenitrile**

**ile (18):** Colorless oil; d.r. = 1:1;  $^1\text{H}$  NMR (400 MHz,  $\text{CDCl}_3$ )  $\delta$ : 7.41-7.26 (m, 10H), 7.17 (d,  $J = 8.0$  Hz, 2H), 7.05 (d,  $J = 8.4$  Hz, 2H), 6.92-6.87 (m, 4H), 4.04 (t,  $J = 7.6$  Hz, 1H), 3.82 (s, 6H),

3.73-3.55 (m, 10H), 3.44 (t,  $J = 8.0$  Hz, 1H), 2.67-2.19 (m, 11H), 2.09-2.02 (m, 1H);  $^{13}\text{C}$  NMR (100 MHz,  $\text{CDCl}_3$ )  $\delta$ : 159.3, 159.2, 135.9, 135.8, 129.8, 129.6, 129.4, 129.1 (2C), 128.1, 128.0, 127.4, 127.3, 121.1, 120.9, 113.9, 113.6, 67.2, 67.1, 66.5, 65.8, 55.3, 50.5, 49.6, 38.8, 37.6, 34.6; LRMS (EI, 70 eV)  $m/z$  (%): 336 ( $\text{M}^+$ , 2), 249 (5), 206 (100), 134 (29), 116 (8); HRMS  $m/z$  (ESI) calcd for  $\text{C}_{21}\text{H}_{25}\text{N}_2\text{O}_2$  ( $\text{M}+\text{H}$ ) $^+$  337.1911, found 337.1923.

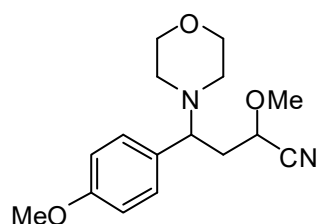

**2-Methoxy-4-(4-methoxyphenyl)-4-morpholinobutan-1-one**

**trile (19):** Colorless oil; d.r. = 1.2:1;  $^1\text{H}$  NMR (400 MHz,  $\text{CDCl}_3$ )  $\delta$ : 7.12 (d,  $J = 8.4$  Hz, 4H), 6.89 (d,  $J = 8.0$  Hz, 4H), 4.04 (t,  $J = 7.2$  Hz, 1H), 3.83-3.80 (m, 7H), 3.67-3.53 (m, 10H), 3.44 (s, 3H), 3.39 (s, 3H), 2.62-2.34 (m, 10H), 2.14-1.96 (m, 2H);  $^{13}\text{C}$  NMR (100 MHz,  $\text{CDCl}_3$ )  $\delta$ : 159.2, 129.6, 129.5, 129.2, 128.9, 118.4, 118.2, 113.8, 113.7, 68.4, 67.1 (2C), 65.0, 64.4, 58.0, 57.9, 55.2, 50.6, 50.1, 36.1, 35.8; LRMS (EI, 70 eV)  $m/z$  (%): 290 ( $\text{M}^+$ , 4), 206 (100), 172 (4), 134 (37), 121 (9); HRMS  $m/z$  (ESI) calcd for  $\text{C}_{16}\text{H}_{23}\text{N}_2\text{O}_3$  ( $\text{M}+\text{H}$ ) $^+$  291.1703, found 291.1712.

**Ethyl**

**2-cyano-4-(4-methoxyphenyl)-4-**

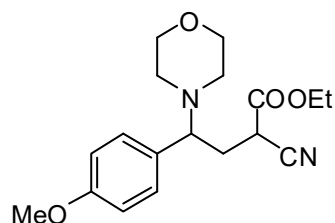

**morpholinobutanoate (20):** Colorless oil; d.r. = 1.1:1;  $^1\text{H}$

NMR (400 MHz,  $\text{CDCl}_3$ )  $\delta$ : 7.15 (d,  $J = 8.0$  Hz, 2H), 7.09 (d,  $J = 8.4$  Hz, 2H), 6.91-6.88 (m, 4H), 4.30-4.22 (m, 4H), 3.93 (dd,  $J = 5.2, 9.2$  Hz, 1H), 3.82 (s, 6H), 3.69-3.60 (m, 10H), 3.38 (t,  $J = 6.8$  Hz, 1H), 2.77-2.64 (m, 2H), 2.48-2.31 (m, 8H), 2.20-2.05 (m, 2H), 1.33 (t,  $J = 7.2$  Hz, 6H);  $^{13}\text{C}$  NMR (100 MHz,  $\text{CDCl}_3$ )  $\delta$ : 166.5, 166.1, 159.3 (2C), 129.7, 129.6, 128.3,

127.6, 116.7, 116.5, 113.9, 113.6, 67.1, 67.0, 66.5, 65.6, 62.8, 55.2, 50.3, 49.4, 35.5, 35.1, 31.6, 31.5, 14.0 (2C); LRMS (EI, 70 eV)  $m/z$  (%): 332 ( $M^+$ , 2), 206 (100), 173 (11), 134 (7); HRMS  $m/z$  (ESI) calcd for  $C_{18}H_{25}N_2O_4$  ( $M+H$ )<sup>+</sup> 333.1809, found 333.1817.

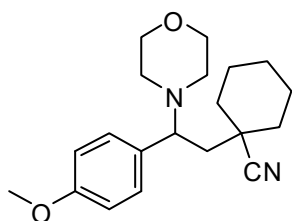

**1-(2-(4-Methoxyphenyl)-2-morpholinoethyl)cyclohexanec**

**arbonitrile (21):** Colorless oil; <sup>1</sup>H NMR (400 MHz, CDCl<sub>3</sub>)

$\delta$ : 7.09 (d,  $J$  = 8.4 Hz, 2H), 6.87 (d,  $J$  = 8.4 Hz, 2H), 3.81 (s,

3H), 3.74 (t,  $J$  = 7.2 Hz, 1H), 3.68 (t,  $J$  = 4.8 Hz, 4H), 2.48-2.43 (m, 2H), 2.36-2.31 (m, 2H), 2.15 (d,  $J$  = 13.6 Hz, 1H), 1.81-1.53 (m, 7H), 1.35-1.26 (m, 2H), 1.18-1.08 (m, 2H); <sup>13</sup>C NMR (100 MHz, CDCl<sub>3</sub>)  $\delta$ : 159.0, 129.9, 129.3, 123.6, 113.4, 67.0, 65.5, 55.2, 49.9, 41.7, 37.9, 37.5, 35.4, 25.3, 22.9 (2C); LRMS (EI, 70 eV)  $m/z$  (%): 328 ( $M^+$ , 1), 242 (6), 206 (100), 135 (12), 121 (8); HRMS  $m/z$  (ESI) calcd for  $C_{20}H_{29}N_2O_2$  ( $M+H$ )<sup>+</sup> 329.2224, found 329.2233.

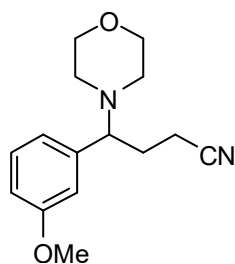

**4-(3-Methoxyphenyl)-4-morpholinobutanenitrile (22):**

Colorless oil; <sup>1</sup>H NMR (400 MHz, CDCl<sub>3</sub>)  $\delta$ : 7.27 (t,  $J$  = 8.0 Hz,

1H), 6.85-6.76 (m, 3H), 3.82 (s, 3H), 3.68 (t,  $J$  = 4.0 Hz, 4H),

3.37 (t,  $J$  = 6.8 Hz, 1H), 2.41 (brs, 4H), 2.38-2.13 (m, 3H),

1.98-1.91 (m, 1H); <sup>13</sup>C NMR (100 MHz, CDCl<sub>3</sub>)  $\delta$ : 159.7, 139.5, 129.5, 120.7, 119.6, 114.3, 112.8, 68.5, 67.1, 55.2, 50.7, 27.9, 14.2; LRMS (EI, 70 eV)  $m/z$  (%): 260 ( $M^+$ , 2), 206 (100), 174 (5), 134 (13), 91 (7); HRMS  $m/z$  (ESI) calcd for  $C_{15}H_{21}N_2O_2$  ( $M+H$ )<sup>+</sup> 261.1598, found 261.1609.



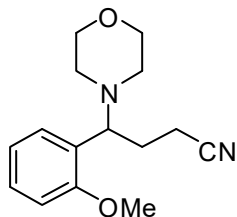

**4-(2-Methoxyphenyl)-4-morpholinobutanenitrile (23):**

Colorless oil;  $^1\text{H}$  NMR (400 MHz,  $\text{CDCl}_3$ )  $\delta$ : 7.28-7.20 (m, 2H), 6.97-6.89 (m, 2H), 4.07 (t,  $J = 6.4$  Hz, 1H), 3.81 (s, 3H), 3.67 (t,  $J = 4.4$  Hz, 4H), 2.42 (brs, 4H), 2.34-2.22 (m, 3H), 2.00-1.92 (m, 1H);  $^{13}\text{C}$  NMR (100 MHz,  $\text{CDCl}_3$ )  $\delta$ : 158.9, 136.5, 129.5, 119.9, 117.2, 113.6, 60.8, 55.2, 52.5, 28.3, 14.7; LRMS (EI, 70 eV)  $m/z$  (%): 260 ( $\text{M}^+$ , 2), 206 (100), 174 (4), 147 (12), 91 (12); HRMS  $m/z$  (ESI) calcd for  $\text{C}_{15}\text{H}_{21}\text{N}_2\text{O}_2$  ( $\text{M}+\text{H}$ ) $^+$  261.1598, found 261.1608.

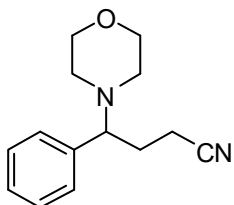

**4-Morpholino-4-phenylbutanenitrile (24):** Colorless oil;  $^1\text{H}$

NMR (400 MHz,  $\text{CDCl}_3$ )  $\delta$ : 7.37-7.29 (m, 3H), 7.21 (d,  $J = 7.2$  Hz, 2H), 3.68 (t,  $J = 4.8$  Hz, 4H), 3.42 (t,  $J = 7.2$  Hz, 1H), 2.41 (brs, 4H), 2.37-2.27 (m, 2H), 2.23-2.14 (m, 1H), 2.03-1.93 (m, 1H);  $^{13}\text{C}$  NMR (100 MHz,  $\text{CDCl}_3$ )  $\delta$ : 137.7, 128.5, 128.4, 127.9, 119.6, 68.5, 67.1, 50.6, 27.8, 14.2; LRMS (EI, 70 eV)  $m/z$  (%): 230 ( $\text{M}^+$ , 2), 176 (100), 144 (6), 105 (9), 91 (16); HRMS  $m/z$  (ESI) calcd for  $\text{C}_{14}\text{H}_{19}\text{N}_2\text{O}$  ( $\text{M}+\text{H}$ ) $^+$  231.1492, found 231.1504.

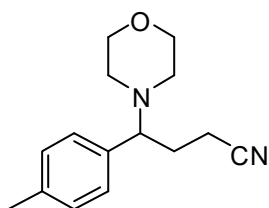

**4-Morpholino-4-p-tolylbutanenitrile (25):** Colorless oil;  $^1\text{H}$

NMR (400 MHz,  $\text{CDCl}_3$ )  $\delta$ : 7.16 (d,  $J = 7.2$  Hz, 2H), 7.09 (d,  $J = 7.6$  Hz, 2H), 3.67 (t,  $J = 4.8$  Hz, 4H), 3.38 (t,  $J = 7.2$  Hz, 1H), 2.39 (brs, 4H), 2.35 (s, 3H), 2.32-2.25 (m, 2H), 2.22-2.14 (m, 1H), 2.01-1.91 (m, 1H);  $^{13}\text{C}$  NMR (100 MHz,  $\text{CDCl}_3$ )  $\delta$ : 137.7, 134.6, 129.2, 128.3, 119.7, 68.2, 67.1, 50.6, 27.9, 21.1, 14.3; LRMS (EI, 70 eV)  $m/z$  (%): 244 ( $\text{M}^+$ , 2), 190 (100), 158 (8), 117 (10); HRMS  $m/z$  (ESI) calcd for  $\text{C}_{15}\text{H}_{21}\text{N}_2\text{O}$  ( $\text{M}+\text{H}$ ) $^+$  245.1648, found 245.1653.

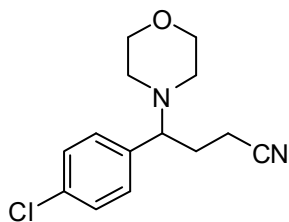

**4-(4-Chlorophenyl)-4-morpholinobutanenitrile (26):**

Colorless oil;  $^1\text{H}$  NMR (400 MHz,  $\text{CDCl}_3$ )  $\delta$ : 7.34 (d,  $J = 8.0$  Hz, 2H), 7.16 (d,  $J = 8.4$  Hz, 2H), 3.67 (t,  $J = 4.4$  Hz, 4H), 3.42 (t,  $J = 7.2$  Hz, 1H), 2.39-2.25 (m, 6H), 2.22-2.15 (m, 1H), 1.97-1.89 (m, 1H);  $^{13}\text{C}$  NMR (100 MHz,  $\text{CDCl}_3$ )  $\delta$ : 136.2, 133.7, 129.6, 128.7, 119.3, 67.8, 67.0, 50.5, 27.8, 14.2; LRMS (EI, 70 eV)  $m/z$  (%): 266( $\text{M}^+ + 2$ , 1), 264 ( $\text{M}^+$ , 3), 210 (100), 178 (8), 138 (9), 125 (15); HRMS  $m/z$  (ESI) calcd for  $\text{C}_{14}\text{H}_{18}^{35}\text{ClN}_2\text{O}$  ( $\text{M} + \text{H}$ ) $^+$  265.1102, found 265.1111.

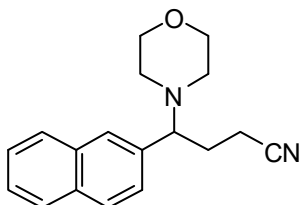

**4-Morpholino-4-(naphthalen-2-yl)butanenitrile (28):**

Colorless oil;  $^1\text{H}$  NMR (400 MHz,  $\text{CDCl}_3$ )  $\delta$ : 7.86-7.82 (m, 3H), 7.67 (s, 1H), 7.53-7.48 (m, 2H), 7.38 (d,  $J = 8.4$  Hz, 1H), 3.69 (t,  $J = 4.4$  Hz, 4H), 3.56 (t,  $J = 7.2$  Hz, 1H), 2.47-2.30 (m, 6H), 2.20-2.02 (m, 2H);  $^{13}\text{C}$  NMR (100 MHz,  $\text{CDCl}_3$ )  $\delta$ : 135.6, 133.1, 128.5, 127.8, 127.7, 127.6, 126.4, 126.2, 125.6, 119.5, 68.8, 67.1, 51.0, 28.0, 14.3; LRMS (EI, 70 eV)  $m/z$  (%): 280 ( $\text{M}^+$ , 4), 226 (100), 194 (6), 154 (23), 127 (7); HRMS  $m/z$  (ESI) calcd for  $\text{C}_{18}\text{H}_{21}\text{N}_2\text{O}$  ( $\text{M} + \text{H}$ ) $^+$  281.1648, found 281.1654.

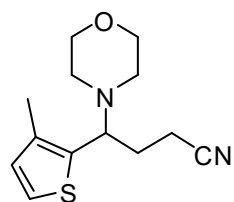

**4-(3-Methylthiophen-2-yl)-4-morpholinobutanenitrile (29):**

Colorless oil;  $^1\text{H}$  NMR (400 MHz,  $\text{CDCl}_3$ )  $\delta$ : 7.20 (d,  $J = 4.8$  Hz, 1H), 6.82 (d,  $J = 4.8$  Hz, 1H), 3.89 (t,  $J = 7.2$  Hz, 1H), 3.73-3.67 (m, 4H), 2.54-2.21 (m, 10H), 1.99-1.92 (m, 1H);  $^{13}\text{C}$  NMR (100 MHz,  $\text{CDCl}_3$ )  $\delta$ : 136.2, 134.9, 129.9, 123.8, 119.4, 67.0, 61.0, 50.5, 29.8, 14.4, 14.3; LRMS (EI, 70 eV)

$m/z$  (%): 250 ( $M^+$ , 3), 196 (100), 164 (32), 124 (22); HRMS  $m/z$  (ESI) calcd for  $C_{13}H_{19}N_2OS$  ( $M+H$ )<sup>+</sup> 251.1213, found 251.1221.

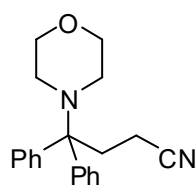

**4-Morpholino-4,4-diphenylbutanenitrile (31):** White solid; mp

164.1-164.8 °C (uncorrected); <sup>1</sup>H NMR (400 MHz, CDCl<sub>3</sub>) δ:

7.38-7.26 (m, 10H), 3.75 (t,  $J$  = 4.8 Hz, 4H), 2.56 (t,  $J$  = 7.6 Hz, 2H),

2.30 (brs, 4H), 2.06 (t,  $J$  = 8.0 Hz, 2H); <sup>13</sup>C NMR (100 MHz, CDCl<sub>3</sub>) δ: 139.0, 129.0,

127.7, 127.3, 120.1, 69.8, 67.4, 47.5, 33.8, 11.9; LRMS (EI, 70 eV)  $m/z$  (%): 306 ( $M^+$ ,

4), 252 (100), 220 (66), 179 (33), 165 (18); HRMS  $m/z$  (ESI) calcd for  $C_{20}H_{23}N_2O$

( $M+H$ )<sup>+</sup> 307.1805, found 307.1813.

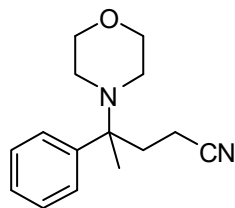

**4-Morpholino-4-phenylpentanenitrile (32):** Colorless oil; <sup>1</sup>H

NMR (400 MHz, CDCl<sub>3</sub>) δ: 7.43 (d,  $J$  = 8.0 Hz, 2H), 7.35 (t,  $J$  =

7.6 Hz, 2H), 7.26 (t,  $J$  = 7.2 Hz, 1H), 3.75-3.66 (m, 4H),

2.52-2.43 (m, 4H), 2.19-2.05 (m, 2H), 2.01-1.87 (m, 2H), 1.40 (s, 3H); <sup>13</sup>C NMR (100

MHz, CDCl<sub>3</sub>) δ: 143.4, 128.5, 127.1, 126.8, 120.0, 67.6, 61.8, 46.7, 37.0, 16.0, 12.2;

LRMS (EI, 70 eV)  $m/z$  (%): 244 ( $M^+$ , 3), 229 (13), 190 (100), 158 (10), 117 (10);

HRMS  $m/z$  (ESI) calcd for  $C_{15}H_{21}N_2O$  ( $M+H$ )<sup>+</sup> 245.1648, found 245.1660.

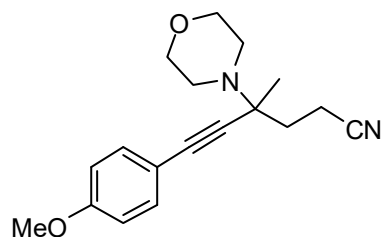

**6-(4-Methoxyphenyl)-4-methyl-4-morpholinohex-5-**

**-ynenitrile (33):** Colorless oil; <sup>1</sup>H NMR (400 MHz,

CDCl<sub>3</sub>) δ: 7.35 (d,  $J$  = 7.6 Hz, 2H), 6.84 (d,  $J$  = 8.0 Hz,

2H), 3.81 (s, 3H), 3.75 (brs, 4H), 2.70-2.55 (m, 6H), 2.18-2.05 (m, 2H), 1.39 (s, 3H);

<sup>13</sup>C NMR (100 MHz, CDCl<sub>3</sub>) δ: 159.6, 133.1, 120.2, 114.5, 113.9, 87.5, 85.7, 67.2,

57.1, 55.3, 47.0, 34.6, 22.7, 12.0; LRMS (EI, 70 eV)  $m/z$  (%): 298 ( $M^+$ , 1), 283 (15),

244 (100), 212 (17), 172 (14); HRMS  $m/z$  (ESI) calcd for  $C_{18}H_{23}N_2O_2$  ( $M+H$ )<sup>+</sup> 299.1754, found 299.1763.

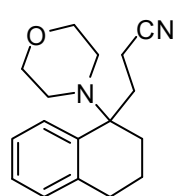

**3-(1-Morpholino-1,2,3,4-tetrahydronaphthalen-1-yl)propanenitrile**

**(34):** Colorless oil; <sup>1</sup>H NMR (400 MHz, CDCl<sub>3</sub>)  $\delta$ : 7.45 (t,  $J$  = 4.4 Hz, 1H), 7.15-7.08 (m, 3H), 3.74-3.65 (m, 4H), 2.79-2.72 (m, 2H),

2.53-2.36 (m, 5H), 2.21-2.02 (m, 4H), 1.88-1.82 (m, 2H), 1.68-1.62 (m, 1H); <sup>13</sup>C NMR (100 MHz, CDCl<sub>3</sub>)  $\delta$ : 138.3, 137.7, 129.6, 127.3, 126.8, 125.6, 120.3, 67.6, 60.2, 46.4, 35.6, 29.4, 26.7, 20.1, 11.7; LRMS (EI, 70 eV)  $m/z$  (%): 270 ( $M^+$ , 3), 216(100), 184 (63), 143 (41), 128 (31); HRMS  $m/z$  (ESI) calcd for  $C_{17}H_{23}N_2O$  ( $M+H$ )<sup>+</sup> 271.1805, found 271.1801.

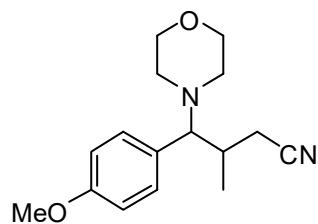

**4-(4-Methoxyphenyl)-3-methyl-4-morpholinobutanenitrile (35):**

**ile (35):**

d.r. = 1.3:1 (from *E-1o*);

Colorless oil; <sup>1</sup>H NMR (400 MHz, CDCl<sub>3</sub>)  $\delta$ : 7.05-7.02 (m, 4H), 6.89-6.87 (m, 4H), 3.81 (s, 6H), 3.71-3.61 (m, 8H), 3.21-3.14 (m, 2H), 2.65-2.28 (m, 13H), 1.94-1.88 (m, 1H), 1.16 (d,  $J$  = 6.4 Hz, 3H), 0.91 (d,  $J$  = 6.4 Hz, 3H); <sup>13</sup>C NMR (100 MHz, CDCl<sub>3</sub>)  $\delta$ : 159.1, 159.0, 130.1, 130.0, 127.2, 126.4, 119.2, 119.0, 113.6, 113.4, 73.0, 72.8, 67.1 (2C), 55.2, 50.3, 49.6, 30.6, 30.3, 22.4, 20.7, 17.4, 16.8; LRMS (EI, 70 eV)  $m/z$  (%): 274 ( $M^+$ , 1), 206 (100), 188 (4), 148 (8), 121 (8); HRMS  $m/z$  (ESI) calcd for  $C_{16}H_{23}N_2O_2$  ( $M+H$ )<sup>+</sup> 275.1754, found 275.1766.

d.r. = 1.4:1 (from *Z-1p*)

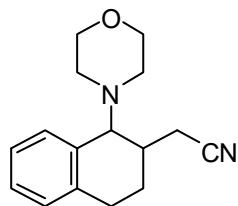

**2-(1-Morpholino-1,2,3,4-tetrahydronaphthalen-2-yl)acetonitrile**

**le (36):** Colorless oil; d.r. = 3:1;  $^1\text{H}$  NMR (400 MHz,  $\text{CDCl}_3$ )  $\delta$ :

7.37-7.09 (m, 4H), 3.75-3.52 (m, 5H), 2.89-2.13 (m, 10H),

1.80-1.68 (m, 1H);  $^{13}\text{C}$  NMR (100 MHz,  $\text{CDCl}_3$ )  $\delta$ : 137.5, 136.3, 134.4, 133.6, 130.2,

130.1, 129.1, 128.9, 127.6, 127.2, 125.8, 125.5, 119.8, 118.9, 67.7, 67.6, 66.8, 63.5,

54.4, 50.8, 38.2, 34.3, 28.2, 27.1, 25.8, 23.7, 21.9, 20.7; LRMS (EI, 70 eV)  $m/z$  (%):

256 ( $\text{M}^+$ , 7), 188 (98), 169 (33), 129 (100), 115 (14); HRMS  $m/z$  (ESI) calcd for

$\text{C}_{16}\text{H}_{21}\text{N}_2\text{O}$  ( $\text{M}+\text{H}$ ) $^+$  257.1648, found 257.1656.

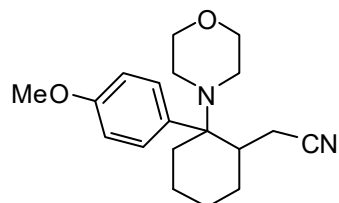

**2-(2-(4-Methoxyphenyl)-2-morpholinocyclohexyl)aceto**

**nitrile (37):** Colorless oil; d.r. = 1:1;  $^1\text{H}$  NMR (400 MHz,

$\text{CDCl}_3$ )  $\delta$ : 7.15 (d,  $J$  = 8.4 Hz, 4H), 6.93-6.88 (m, 4H),

3.82 (s, 3H), 3.81 (s, 3H), 3.66-3.61 (m, 8H), 3.14-3.02 (m, 2H), 2.80 (d,  $J$  = 7.2 Hz,

1H), 2.57-2.04 (m, 13H), 1.93-1.83 (m, 2H), 1.72-1.15 (m, 12H);  $^{13}\text{C}$  NMR (100 MHz,

$\text{CDCl}_3$ )  $\delta$ : 158.3, 158.2, 130.0, 128.2, 127.8, 126.6, 120.8, 119.9, 113.3, 67.6, 67.4,

62.4, 61.8, 55.1, 45.5, 45.3, 35.6, 34.1, 27.0, 25.8, 24.8, 23.5, 21.9, 21.0, 20.2, 19.3,

17.6, 15.5; LRMS (EI, 70 eV)  $m/z$  (%): 314 ( $\text{M}^+$ , 43), 274 (15), 232 (73), 187 (25),

147 (29), 121 (100); HRMS  $m/z$  (ESI) calcd for  $\text{C}_{19}\text{H}_{27}\text{N}_2\text{O}_2$  ( $\text{M}+\text{H}$ ) $^+$  315.2067, found

315.2075.

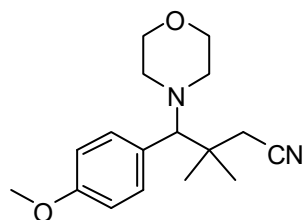

**4-(4-Methoxyphenyl)-3,3-dimethyl-4-morpholinobutane**

**nitrile (38):** Colorless oil;  $^1\text{H}$  NMR (400 MHz,  $\text{CDCl}_3$ )  $\delta$ :

7.15 (d,  $J$  = 8.4 Hz, 2H), 6.88 (d,  $J$  = 8.0 Hz, 2H), 3.82 (s,

3H), 3.72-3.64 (m, 4H), 3.30 (s, 1H), 2.68-2.62 (m, 3H), 2.36-2.31 (m, 3H), 1.30 (s,

3H), 1.00 (s, 3H);  $^{13}\text{C}$  NMR (100 MHz,  $\text{CDCl}_3$ )  $\delta$ : 158.9, 131.7, 126.8, 119.0, 113.3, 76.7, 67.4, 55.2, 53.0, 39.4, 30.5, 25.9, 24.6; LRMS (EI, 70 eV)  $m/z$  (%): 288 ( $\text{M}^+$ , 1), 206 (100), 162 (3), 121 (9); HRMS  $m/z$  (ESI) calcd for  $\text{C}_{17}\text{H}_{25}\text{N}_2\text{O}_2$  ( $\text{M}+\text{H}$ ) $^+$  289.1911, found 289.1919.

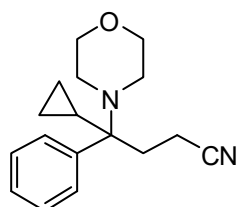

**4-Cyclopropyl-4-morpholino-4-phenylbutanenitrile (39):**

White solid; mp 106.1-107.1 °C (uncorrected);  $^1\text{H}$  NMR (400 MHz,  $\text{CDCl}_3$ )  $\delta$ : 7.64 (d,  $J = 8.0$  Hz, 2H), 7.34 (t,  $J = 7.2$  Hz, 2H), 7.27-7.23 (m, 1H), 3.78-3.67 (m, 4H), 2.80-2.76 (m, 2H), 2.63-2.59 (m, 2H), 2.40-2.32 (m, 1H), 2.09-2.00 (m, 1H), 1.92-1.84 (m, 1H), 1.50-1.42 (m, 1H), 1.26-1.17 (m, 1H), 0.74-0.66 (m, 2H), 0.61-0.48 (m, 2H);  $^{13}\text{C}$  NMR (100 MHz,  $\text{CDCl}_3$ )  $\delta$ : 144.0, 128.2, 127.5, 127.0, 120.3, 67.8, 63.0, 47.4, 28.8, 14.1, 11.2, 1.3, 0.7; LRMS (EI, 70 eV)  $m/z$  (%): 270 ( $\text{M}^+$ , 1), 229 (15), 216 (100), 141 (34); HRMS  $m/z$  (ESI) calcd for  $\text{C}_{17}\text{H}_{23}\text{N}_2\text{O}$  ( $\text{M}+\text{H}$ ) $^+$  271.1805, found 271.1813.

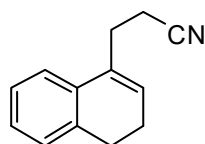

**3-(3,4-Dihydronaphthalen-1-yl)propanenitrile (40)<sup>8</sup>:** Colorless oil;  $^1\text{H}$  NMR (400 MHz,  $\text{CDCl}_3$ )  $\delta$ : 7.25-7.11 (m, 4H), 6.00 (t,  $J = 4.4$  Hz, 1H), 2.82-2.74 (m, 4H), 2.56 (t,  $J = 7.6$  Hz, 2H), 2.31-2.26 (m, 2H);  $^{13}\text{C}$  NMR (100 MHz,  $\text{CDCl}_3$ )  $\delta$ : 136.8, 133.1, 133.0, 128.0, 127.4, 127.2, 126.5, 121.7, 119.3, 28.6, 28.0, 22.9, 16.7.

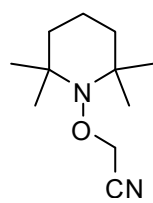

**2-(2,2,6,6-Tetramethylpiperidin-1-yloxy)acetonitrile (41)<sup>9</sup>:** Colorless oil;  $^1\text{H}$  NMR (400 MHz,  $\text{CDCl}_3$ )  $\delta$ : 4.51 (s, 2H), 1.58-1.31 (m, 6H), 1.20 (s, 6H), 1.10 (s, 6H);  $^{13}\text{C}$  NMR (100 MHz,  $\text{CDCl}_3$ )  $\delta$ : 116.0, 62.6, 60.3, 39.5, 32.9, 19.8, 16.8.

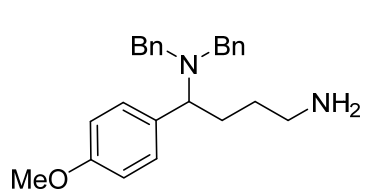

***N,N'*-dibenzyl-1-(4-methoxyphenyl)butane-1,4-diamine (42):<sup>10</sup>**

To a suspension of LiAlH<sub>4</sub> (0.3 mmol) in THF (1 mL) at 0 °C was slowly added a solution of **4** (0.15 mmol) in THF (1.0 mL), then, the mixture was warmed to room temperature, and stirred for an additional 4 h. Water was cautiously added until gas evolution ceased, followed by addition of 1M NaOH until the solution became basic (pH > 9). The aqueous layer was extracted with EtOAc (3×10 mL). The combined organic layer was washed with H<sub>2</sub>O (2×10 mL) and brine (10 mL), and dried (anhyd Na<sub>2</sub>SO<sub>4</sub>). The residue was further purified by flash chromatography (CH<sub>2</sub>Cl<sub>2</sub>/MeOH/NH<sub>4</sub>OH, 90/10/1 to 80/20/1), yielding the corresponding amine **42**.

Colorless oil; <sup>1</sup>H NMR (400 MHz, CDCl<sub>3</sub>) δ: 7.39-7.28 (m, 8H), 7.24-7.12 (m, 4H), 6.90 (d, *J* = 8.0 Hz, 2H), 3.80-3.77 (m, 7H), 3.60 (t, *J* = 7.2 Hz, 1H), 3.08 (d, *J* = 13.6 Hz, 2H), 2.59 (brs, 2H), 2.10 (dd, *J* = 9.6, 17.2 Hz, 1H), 1.67 (brs, 2H), 1.42 (brs, 1H); <sup>13</sup>C NMR (100 MHz, CDCl<sub>3</sub>) δ: 158.5, 140.3, 130.4, 129.9, 128.7, 128.2, 126.7, 113.2, 60.7, 55.1, 53.5, 41.3, 29.1, 28.8; HRMS *m/z* (ESI) calcd for C<sub>25</sub>H<sub>31</sub>N<sub>2</sub>O (M+H)<sup>+</sup> 375.2431, found 375.2442.

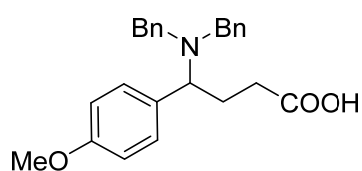

**4-(Dibenzylamino)-4-(4-methoxyphenyl)butanoic acid (43):<sup>10</sup>**

The mixture of **4** (0.15 mmol) and NaOH (0.15 mmol) in ethanol/water (1:1, 2 mL) was heated to reflux for 72 h. After cooling to room temperature, the ethanol was removed in vacuo and the aqueous phase was acidified by

1 M HCl (to pH 5.5-6) and extracted with EtOAc (3×10 mL). The organic layer was dried with anhydrous Na<sub>2</sub>SO<sub>4</sub>. The solvent was evaporated under reduced pressure. The residue was purified by flash chromatography(EtOAc/Hexane, 1/2), yielding the corresponding acid **43**

Colorless oil; <sup>1</sup>H NMR (400 MHz, CDCl<sub>3</sub>) δ: 7.39 (d, *J* = 7.2 Hz, 4H), 7.31 (t, *J* = 7.6 Hz, 4H), 7.22 (t, *J* = 7.2 Hz, 2H), 7.16 (d, *J* = 8.4 Hz, 2H), 6.93 (d, *J* = 8.0 Hz, 2H), 3.87 (d, *J* = 13.6 Hz, 2H), 3.83 (s, 3H), 3.72 (t, *J* = 7.2 Hz, 1H), 3.10 (d, *J* = 13.6 Hz, 2H), 2.55-2.35 (m, 3H), 2.01-1.93 (m, 1H); <sup>13</sup>C NMR (100 MHz, CDCl<sub>3</sub>) δ: 179.2, 158.9, 139.0, 130.1, 129.2, 129.0, 128.4, 127.0, 113.4, 60.9, 55.2, 53.6, 32.4, 26.4; HRMS *m/z* (ESI) calcd for C<sub>25</sub>H<sub>28</sub>NO<sub>3</sub> (M+H)<sup>+</sup> 390.2064, found 390.2076.

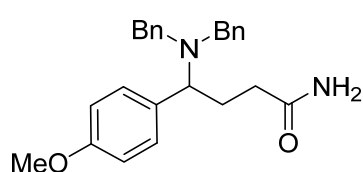

**4-(Dibenzylamino)-4-(4-methoxyphenyl)butanamide**

**(44):<sup>11</sup>**

Nitrile **4** (0.15 mmol) was dissolved in a mixture of water/THF (1:3, 2 mL). Acetamide (4 equiv) and PdCl<sub>2</sub> (0.015 mmol) were added, and the mixture was stirred at room temperature for 24 h. The reaction was diluted with EtOAc and washed with NaHCO<sub>3</sub> and brine. After dried over Na<sub>2</sub>SO<sub>4</sub>, it was concentrated and purified by flash chromatography (EtOAc/Hexane, 1/2) to give the compound amide **44**.

Colorless oil; <sup>1</sup>H NMR (400 MHz, CDCl<sub>3</sub>) δ: 7.37-7.14 (m, 12H), 7.20 (d, *J* = 8.0 Hz, 2H), 5.52 (s, 1H), 5.20 (s, 1H), 3.83 (s, 3H), 3.80 (d, *J* = 13.6 Hz, 2H), 3.62 (t, *J* = 7.2 Hz, 1H), 3.12 (d, *J* = 13.6 Hz, 2H), 2.40-2.29 (m, 2H), 2.17-2.04 (m, 2H); <sup>13</sup>C NMR (100 MHz, CDCl<sub>3</sub>) δ: 175.4, 158.7, 140.1, 130.0, 129.9, 128.8, 128.2, 126.8, 113.4,



60.7, 55.2, 53.5, 33.3, 27.2; HRMS  $m/z$  (ESI) calcd for  $C_{25}H_{29}N_2O_2$  (M+H)<sup>+</sup> 389.2224, found 389.2232.

### Supplementary References

(1) Gajare, A. S., Jensen, R. S., Toyota, K., Yoshifuji, M. & Ozawa, F. Low-coordinated diphosphinidencyclobutene ligands: a New entry for stille cross-coupling of aryl bromides. *Synlett* 144-148 (2005).

(2) Larsen, C. R. & Grotjahn, D. B. Stereoselective alkene isomerization over one position. *J. Am. Chem. Soc.* **134**, 10357-10360 (2012).

(3) Lee, C.-L. *et al.* First total synthesis of antrocamphin A and its analogs as anti-inflammatory and anti-platelet aggregation agents. *Org. Biomol. Chem.* **9**, 70-73 (2011).

(4) Blum, T. R., Zhu, Y., Nordeen, S. A. & Yoon, T. P. Photocatalytic synthesis of dihydrobenzofurans by oxidative [3+2] cycloaddition of phenols. *Angew. Chem. Int. Ed.* **53**, 11056-11059 (2014).

(5) Ojha, D. P. & Prabhu, K. R. Palladium catalyzed coupling of tosylhydrazones with aryl and heteroaryl halides in the absence of external ligand: synthesis of substituted olefins *J. Org. Chem.* **77**, 11027-11033 (2012).

(6) Yan, J., Jin, S. & Wang, B. A novel redox-sensitive protecting group for boronic acids, MPMP-diol. *Tetrahedron Lett.* **46**, 8503-8505 (2005).

(7) Liwosz, T. W. & Chemler, S. R. Copper-catalyzed oxidative amination and allylic amination of alkenes. *Chem.-Eur. J.* **19**, 12771-12777 (2013).

(8) Chatalova-Sazepin, C., Wang, Q. M., Sammis, G. & Zhu, J. Copper-catalyzed intermolecular carboetherification of unactivated alkenes by alkyl nitriles and alcohols. *Angew. Chem. Int. Ed.* **54**, 5443-5446 (2015).

(9) Bunescu, A., Wang, Q. & Zhu, J. Synthesis of functionalized epoxides by copper-catalyzed alkylative epoxidation of allylic Alcohols with alkyl nitriles. *Org. Lett.* **17**, 1890-1893 (2015).

(10) Rappoport, Z. *The Chemistry of the Cyano Group*. (Wiley, London, 1970).

(11) Maffioli, S. I., Marzorati, E. & Marazzi, A. Mild and reversible dehydration of primary amides with PdCl<sub>2</sub> in aqueous acetonitrile. *Org. Lett.* **7**, 5237-5239 (2005).

## Supplementary Figures

### Supplementary Figure 1. $^1\text{H}$ , $^{13}\text{C}$ -NMR spectra of product 4

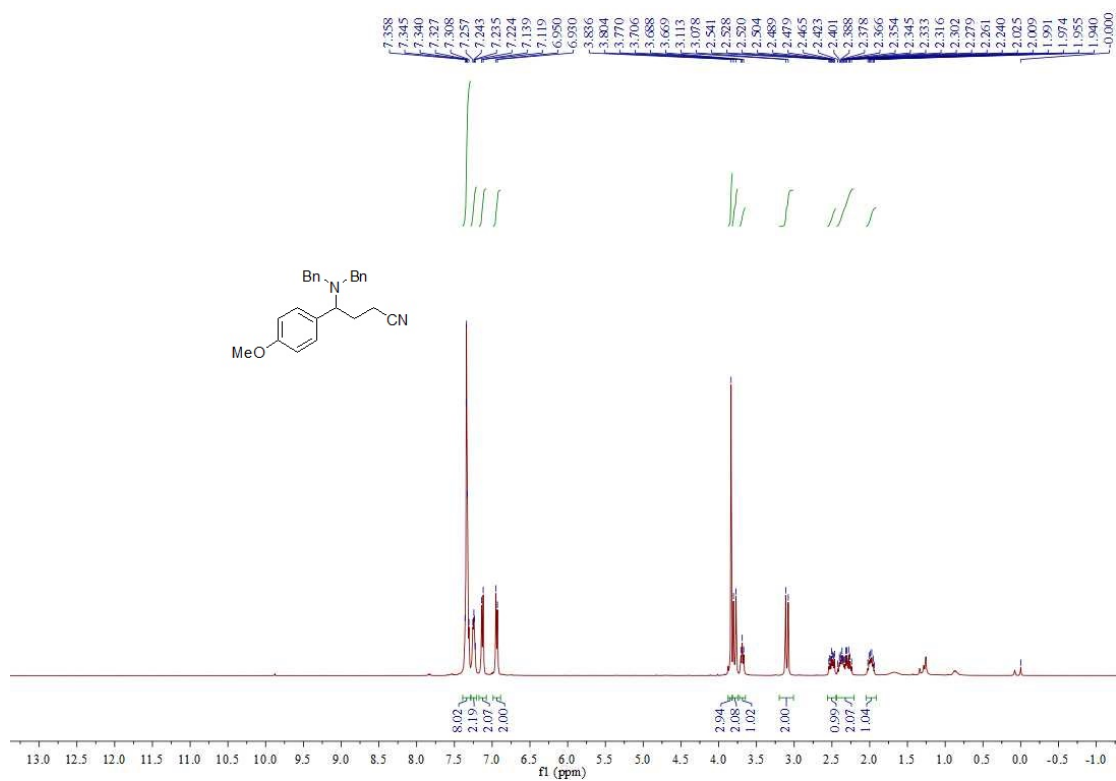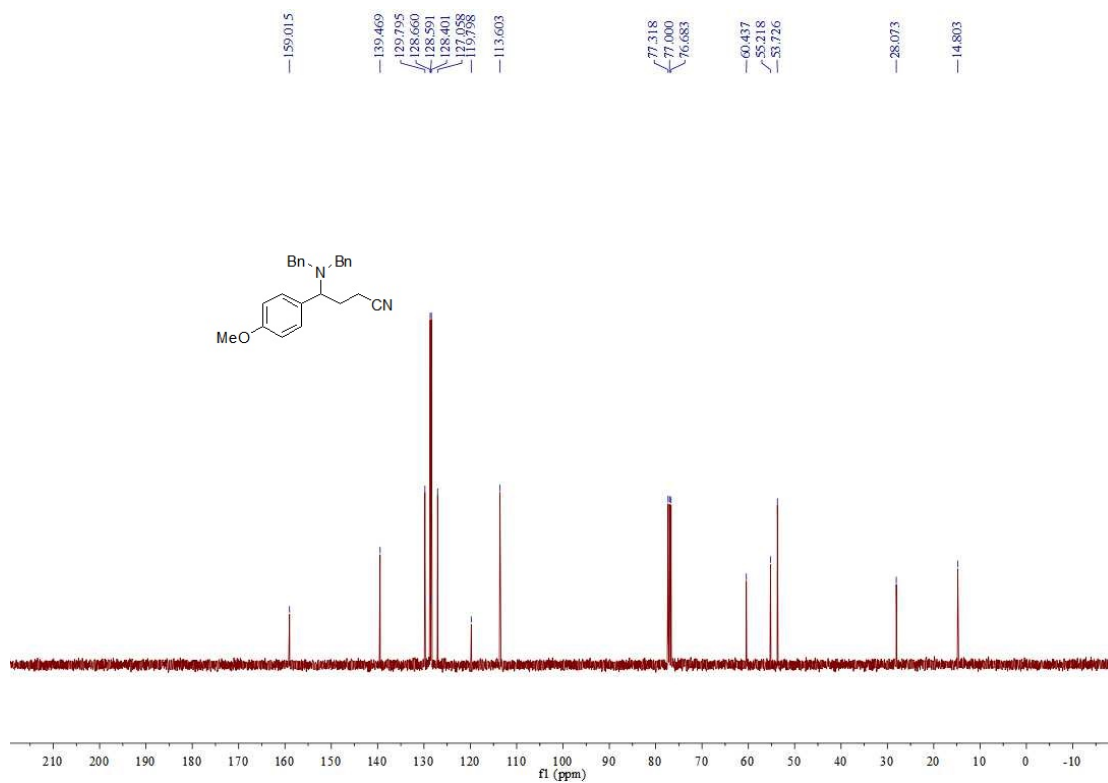

Supplementary Figure 2.  $^1\text{H}$ ,  $^{13}\text{C}$ -NMR spectra of product **5**

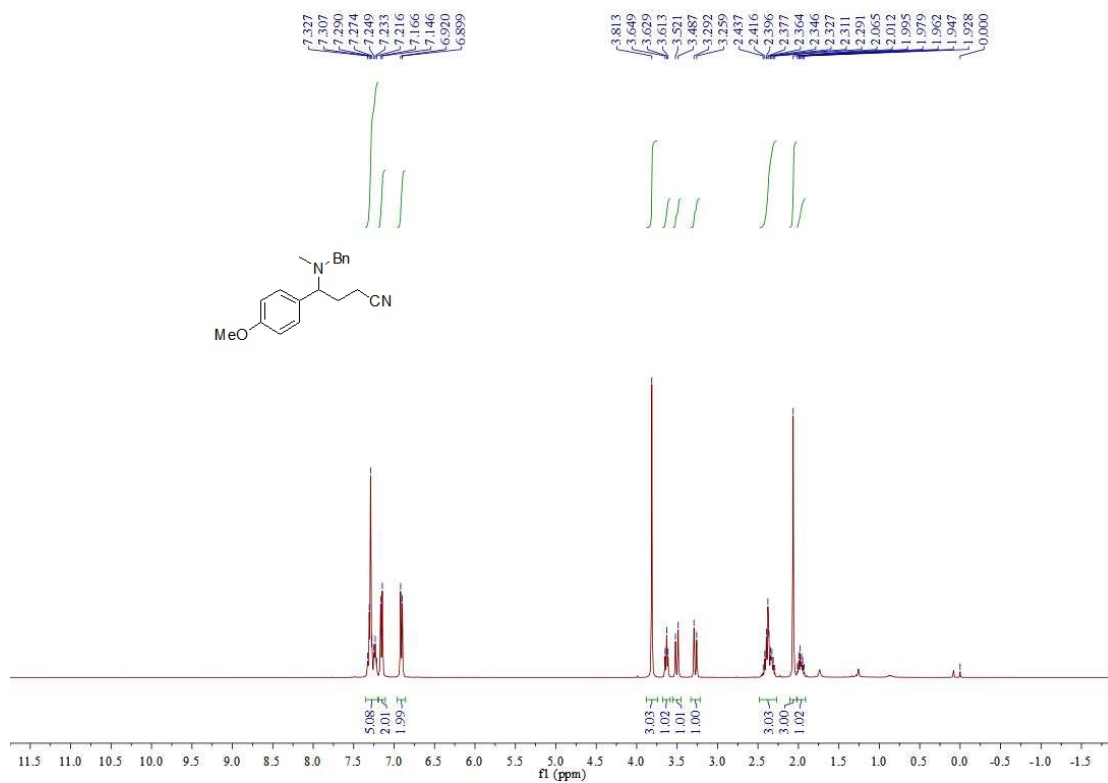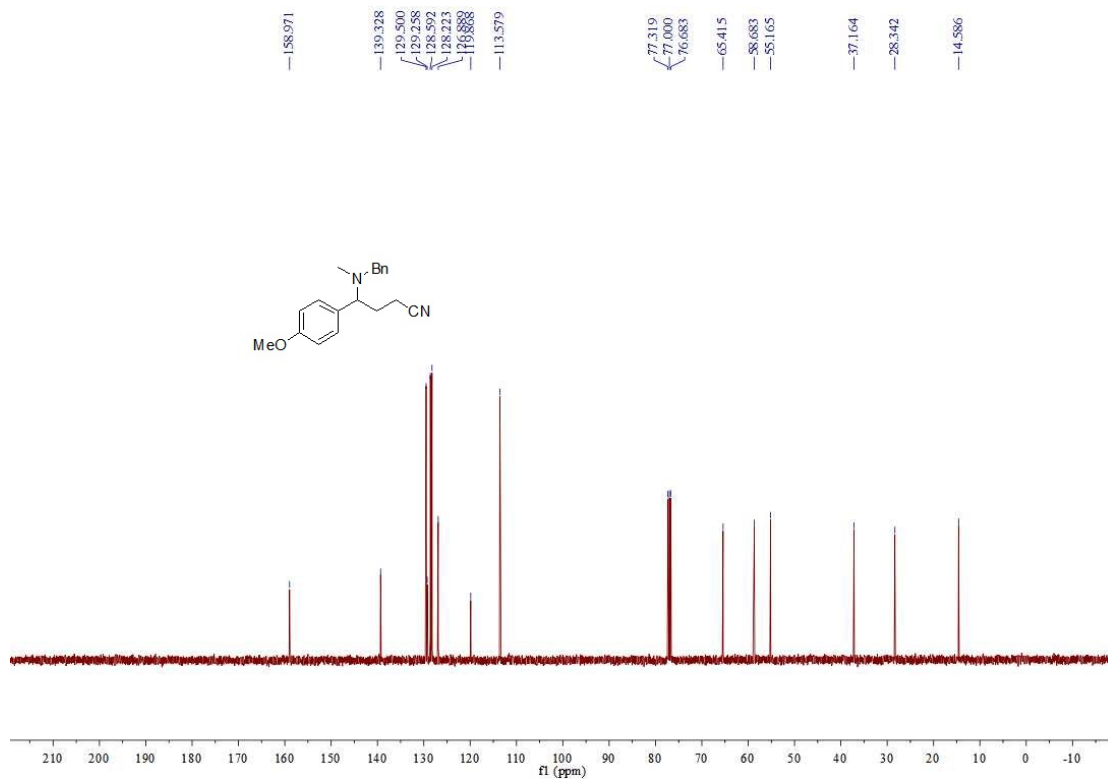

Supplementary Figure 3.  $^1\text{H}$ ,  $^{13}\text{C}$ -NMR spectra of product 6

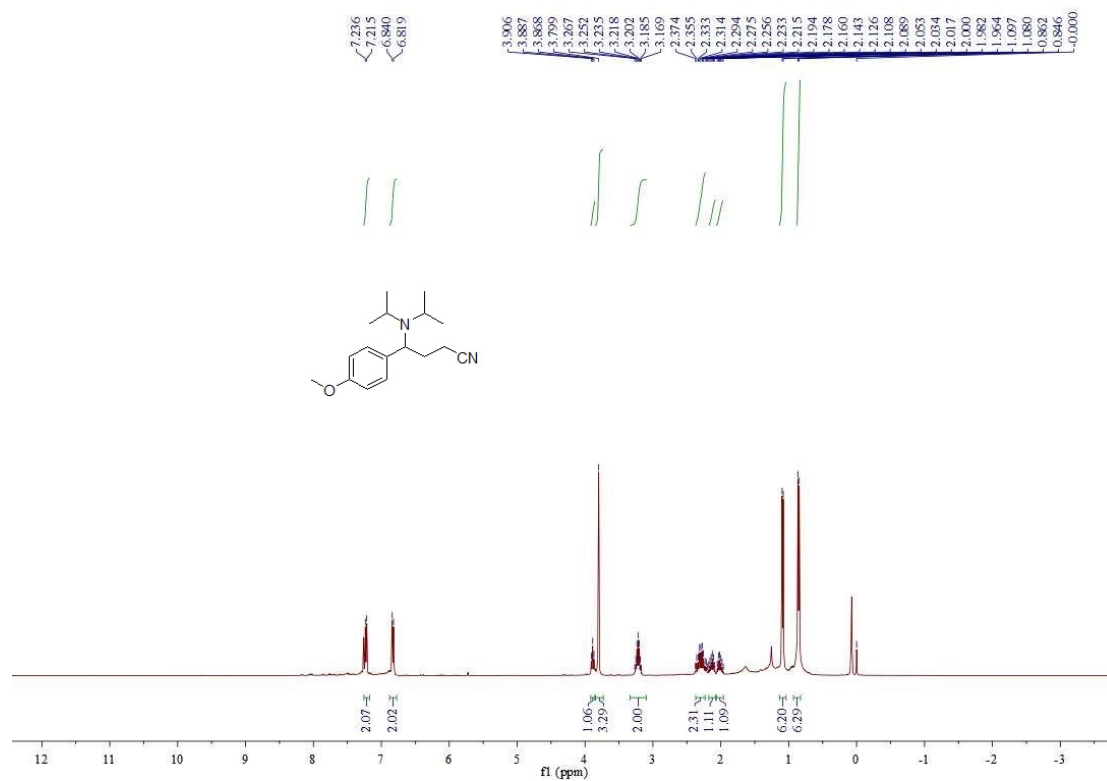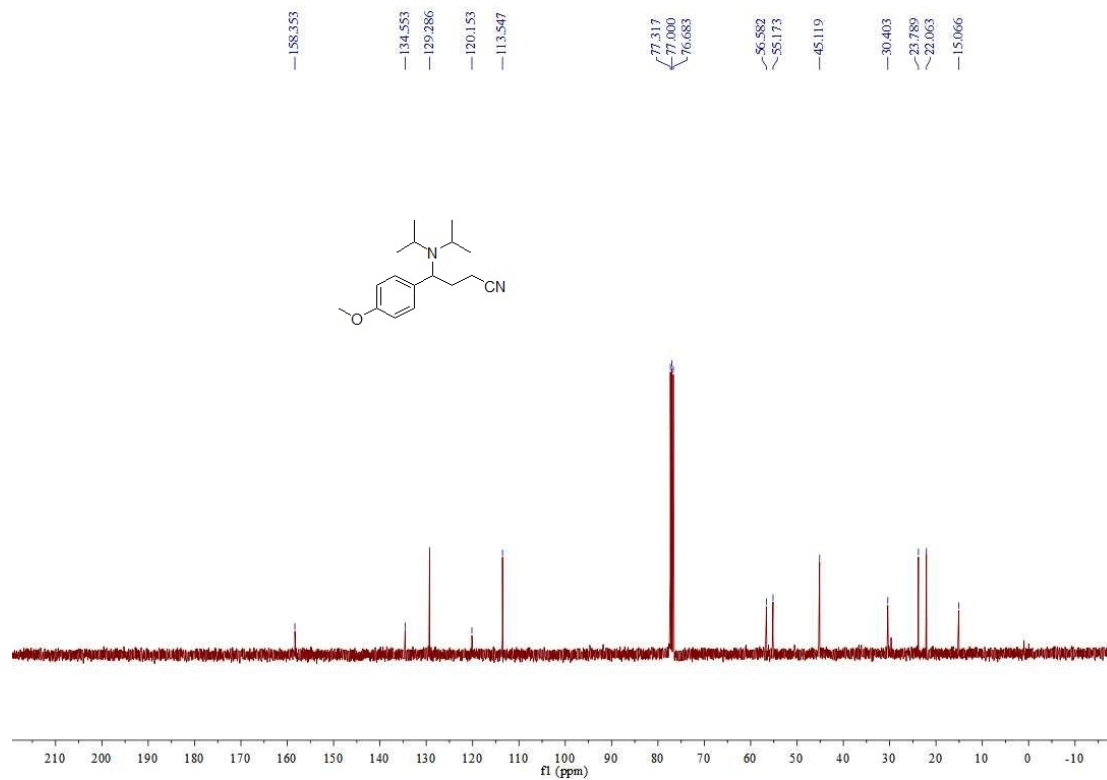

Supplementary Figure 4.  $^1\text{H}$ ,  $^{13}\text{C}$ -NMR spectra of product 7

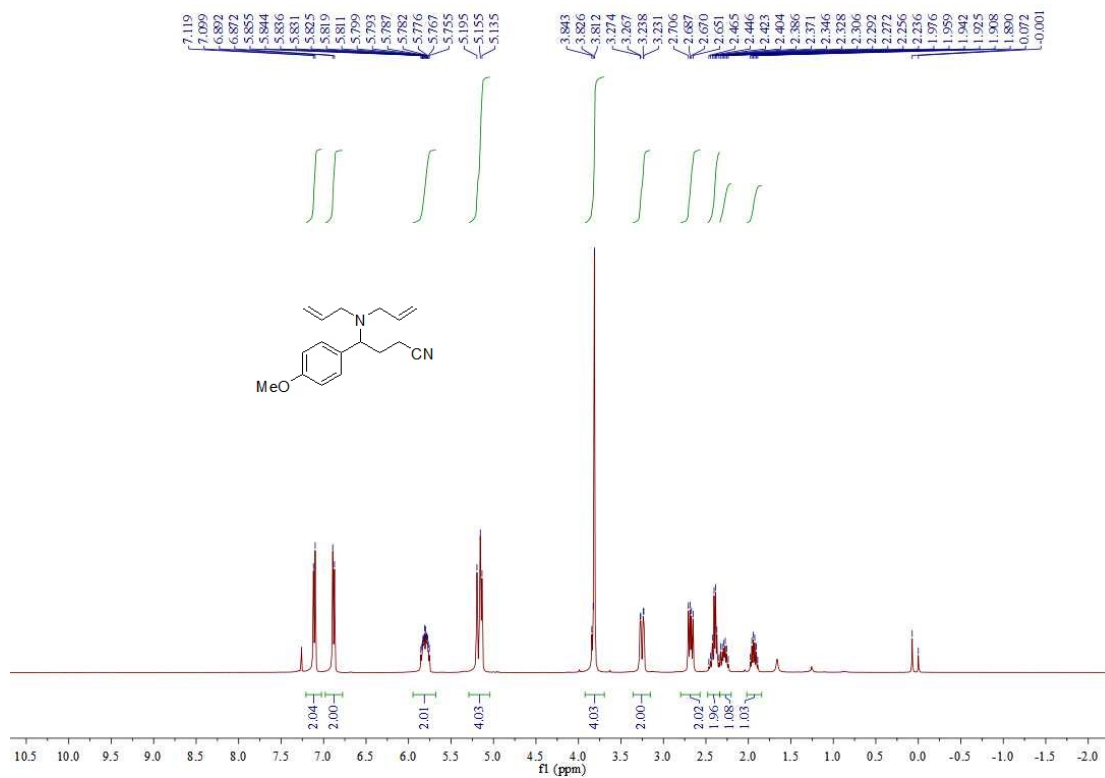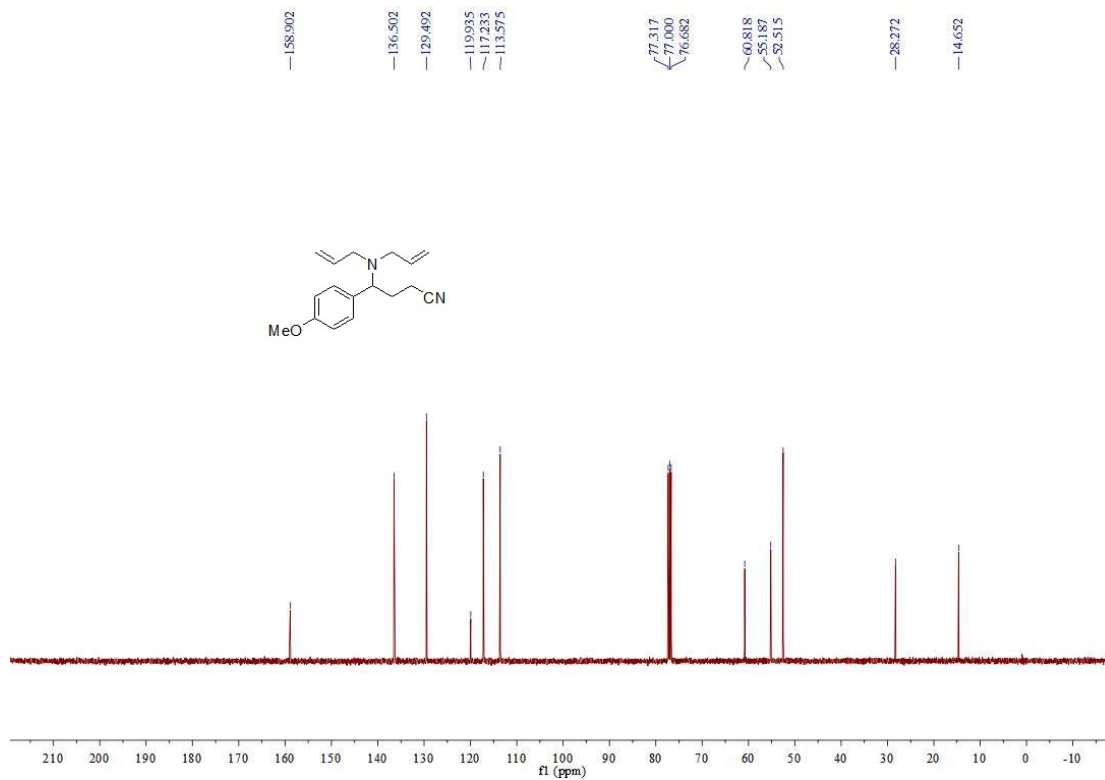

Supplementary Figure 5.  $^1\text{H}$ ,  $^{13}\text{C}$ -NMR spectra of product 8

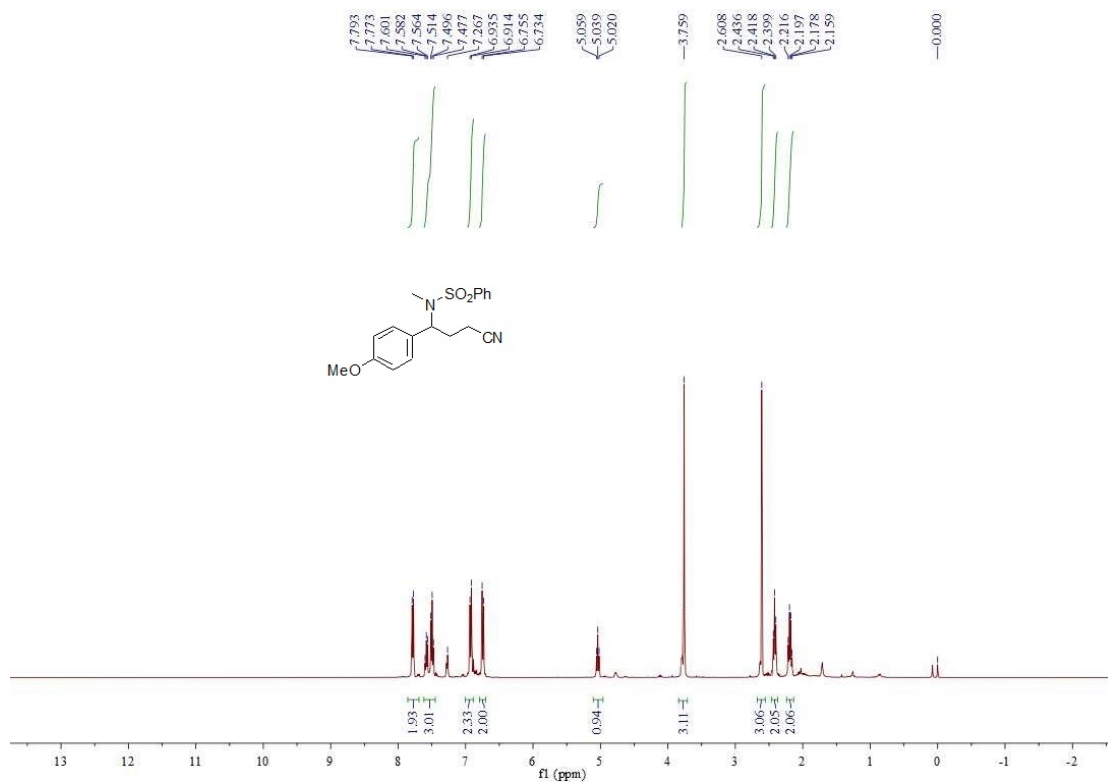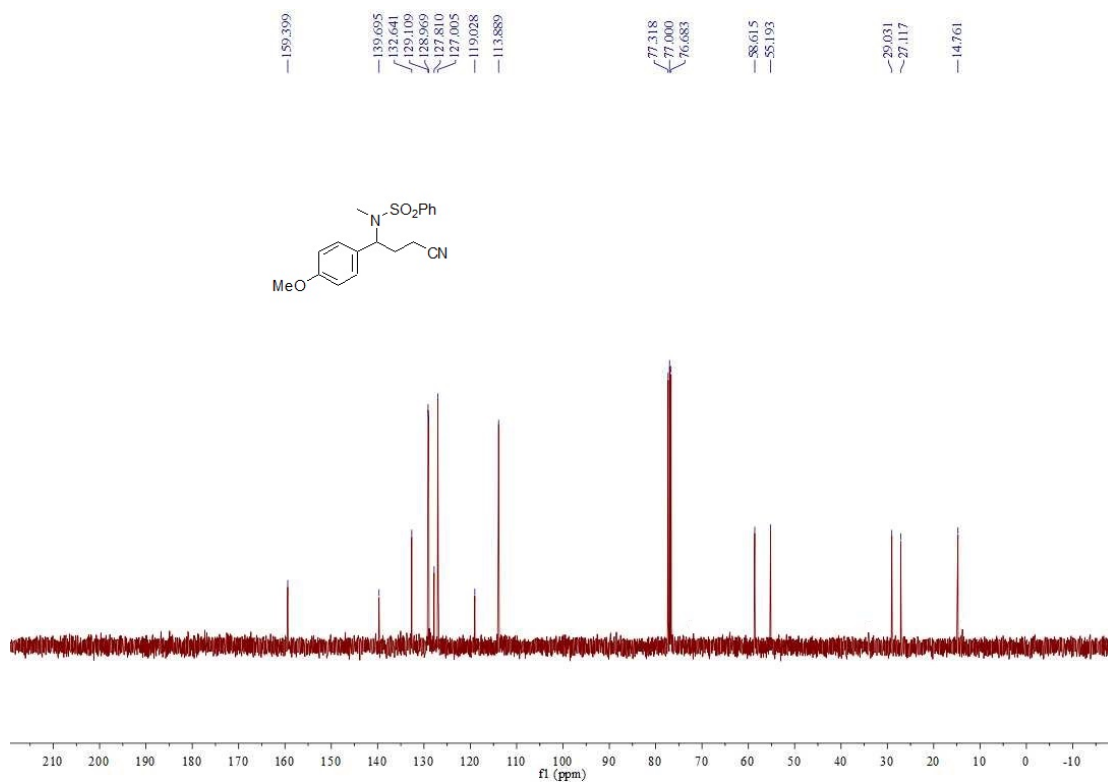

Supplementary Figure 6.  $^1\text{H}$ ,  $^{13}\text{C}$ -NMR spectra of product 9

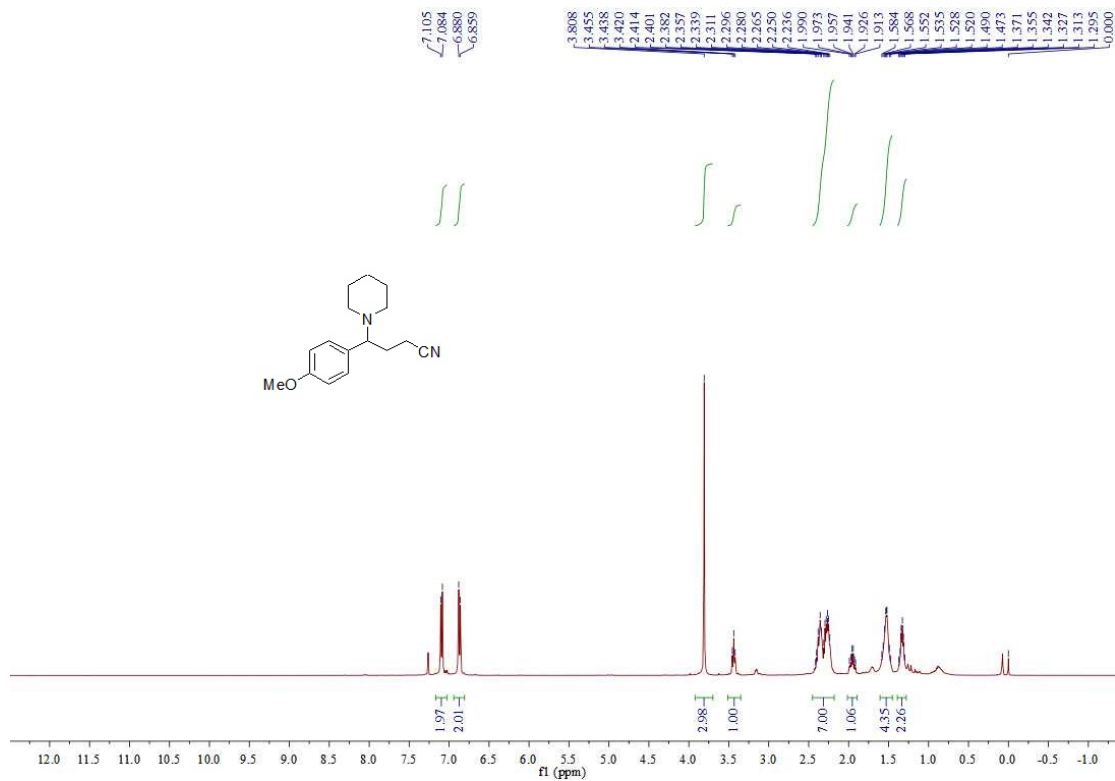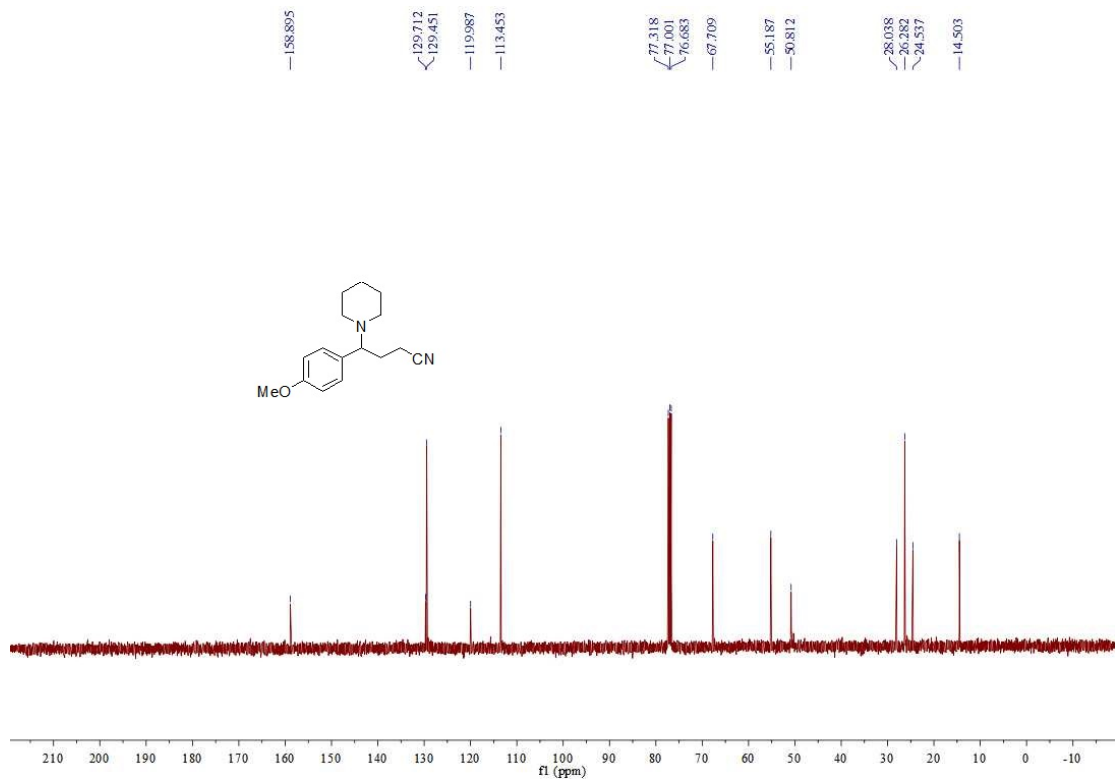



Supplementary Figure 7.  $^1\text{H}$ ,  $^{13}\text{C}$ -NMR spectra of product 10

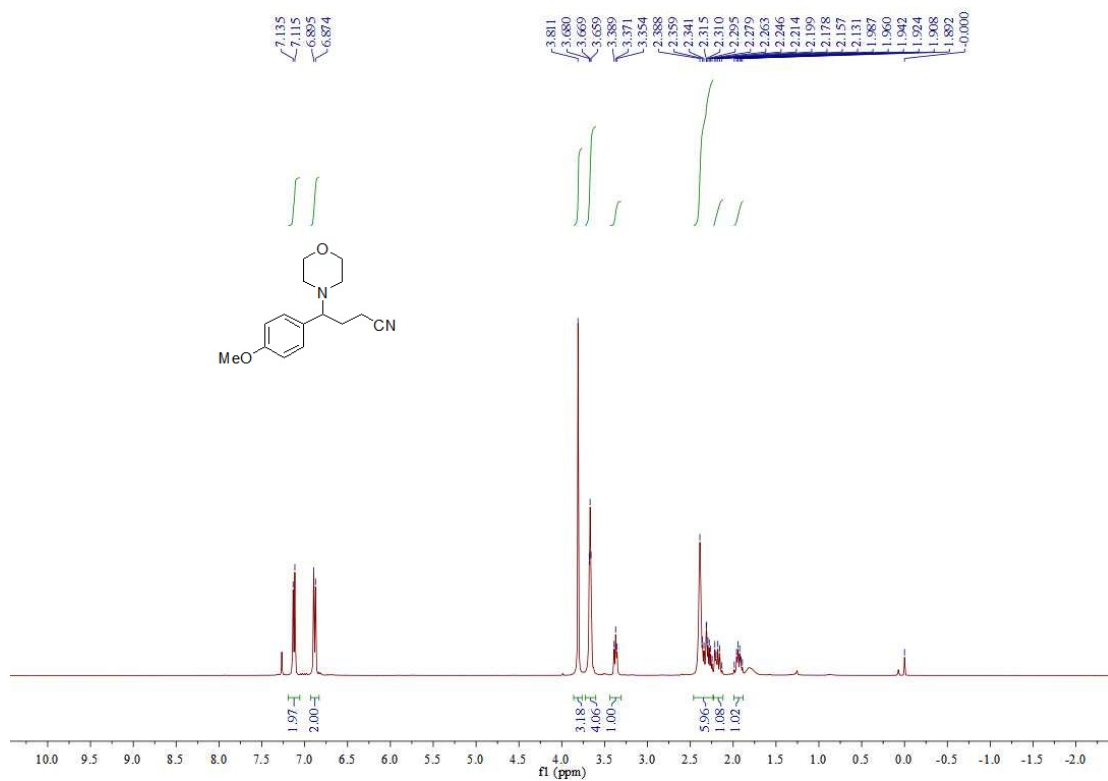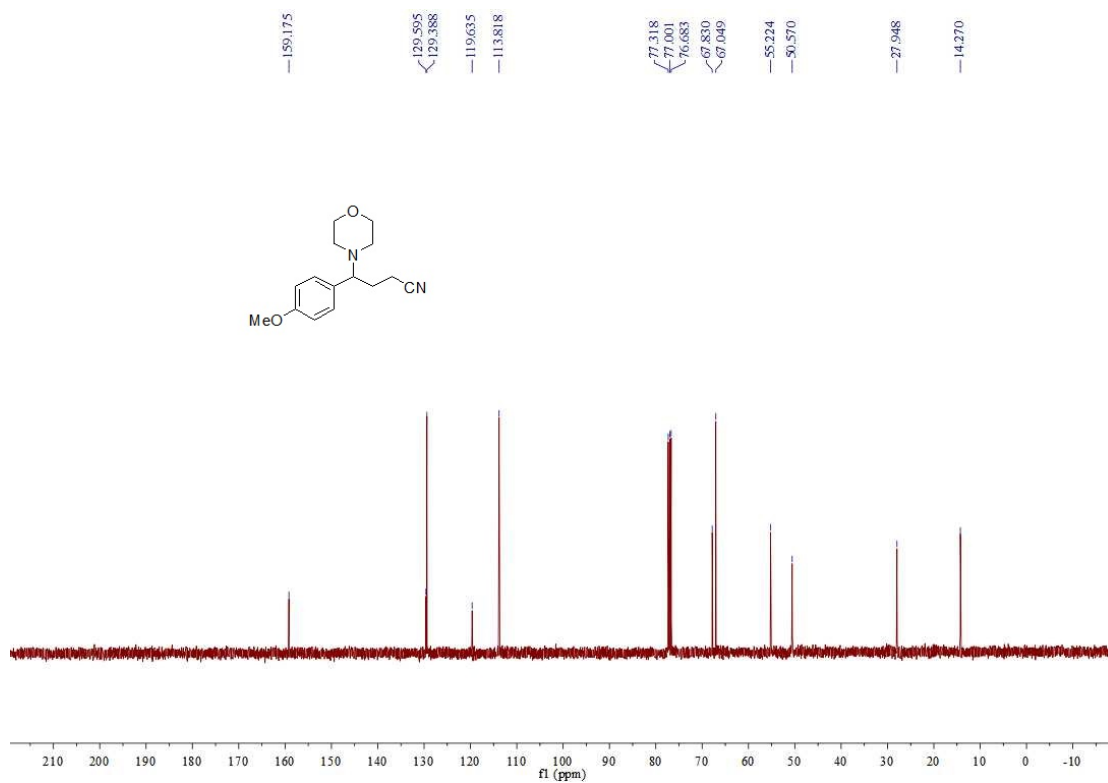

Supplementary Figure 8.  $^1\text{H}$ ,  $^{13}\text{C}$ -NMR spectra of product 11

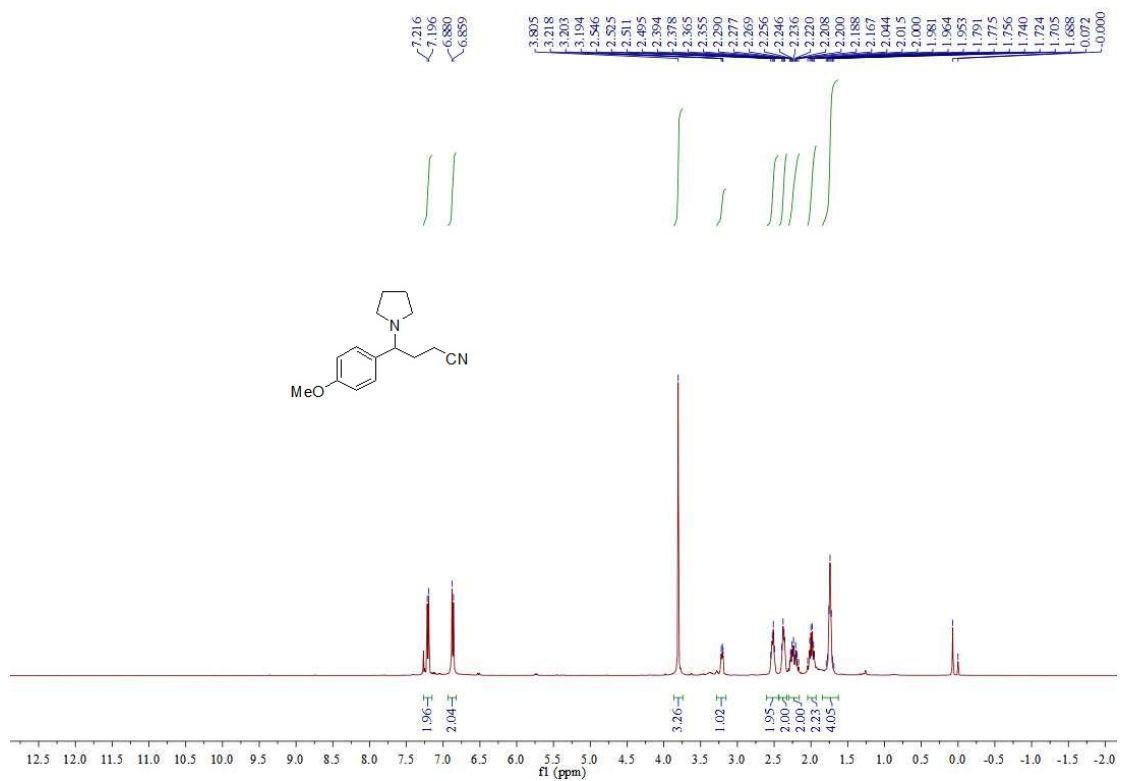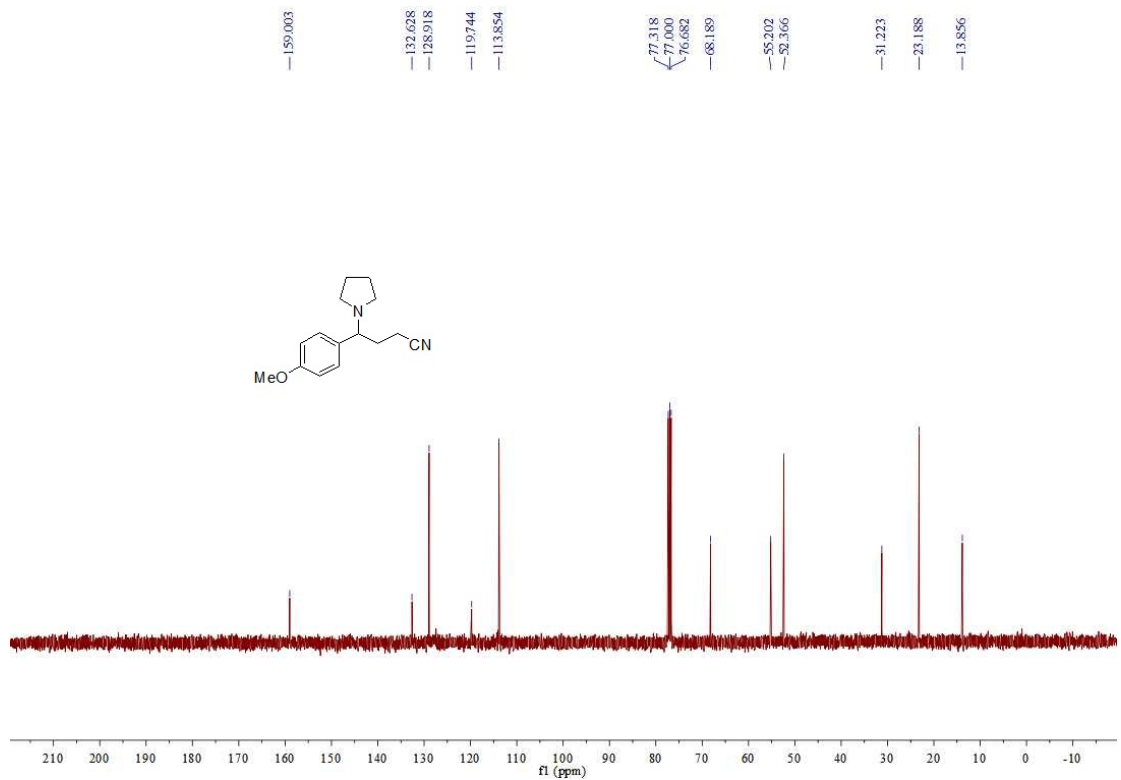

Supplementary Figure 9.  $^1\text{H}$ ,  $^{13}\text{C}$ -NMR spectra of product 12

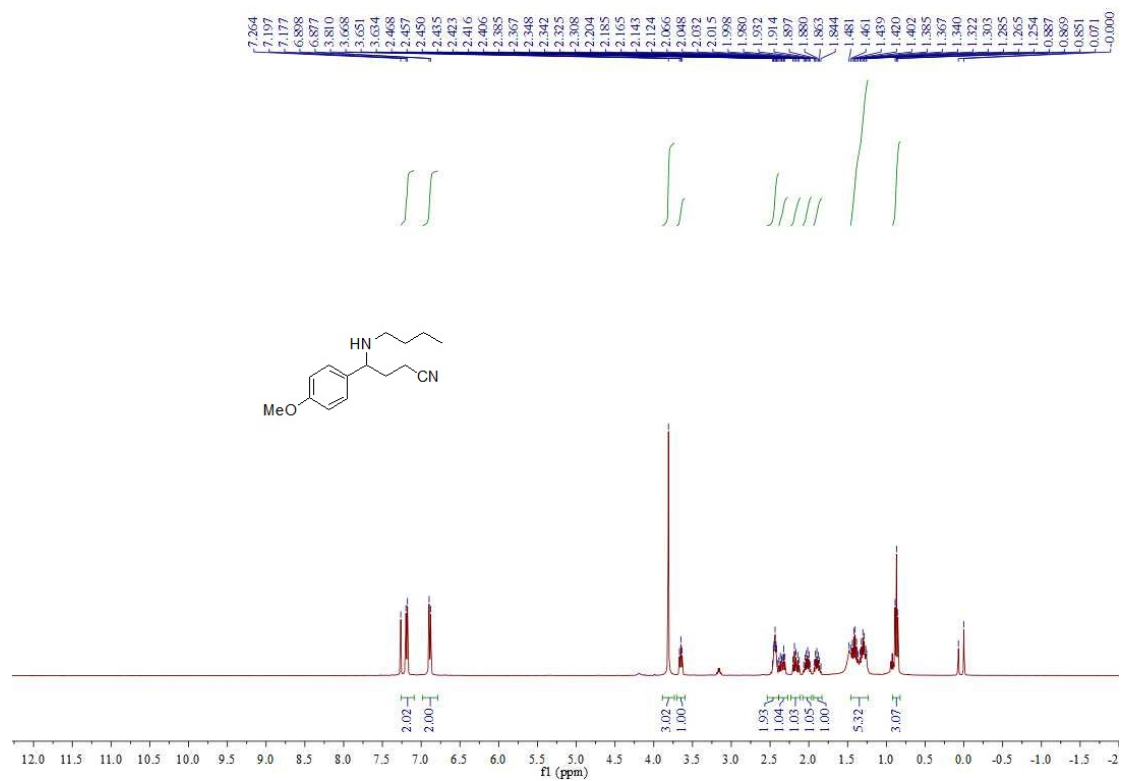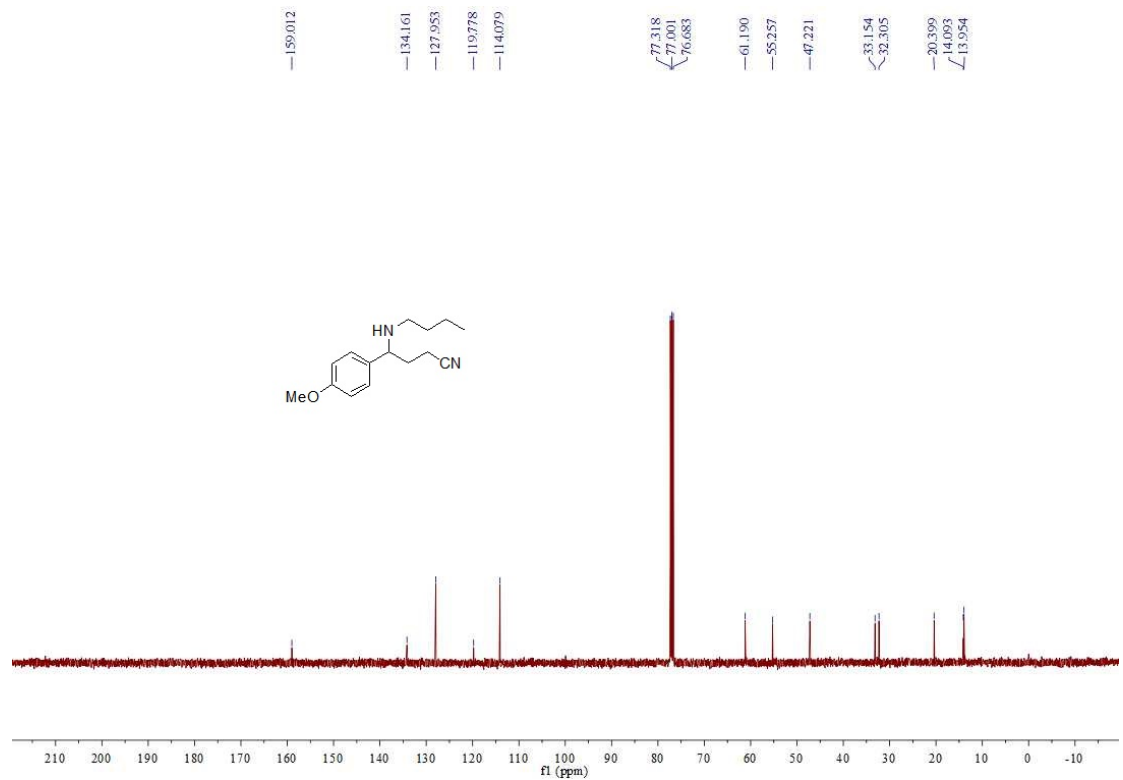

Supplementary Figure 10.  $^1\text{H}$ ,  $^{13}\text{C}$ -NMR spectra of product 13

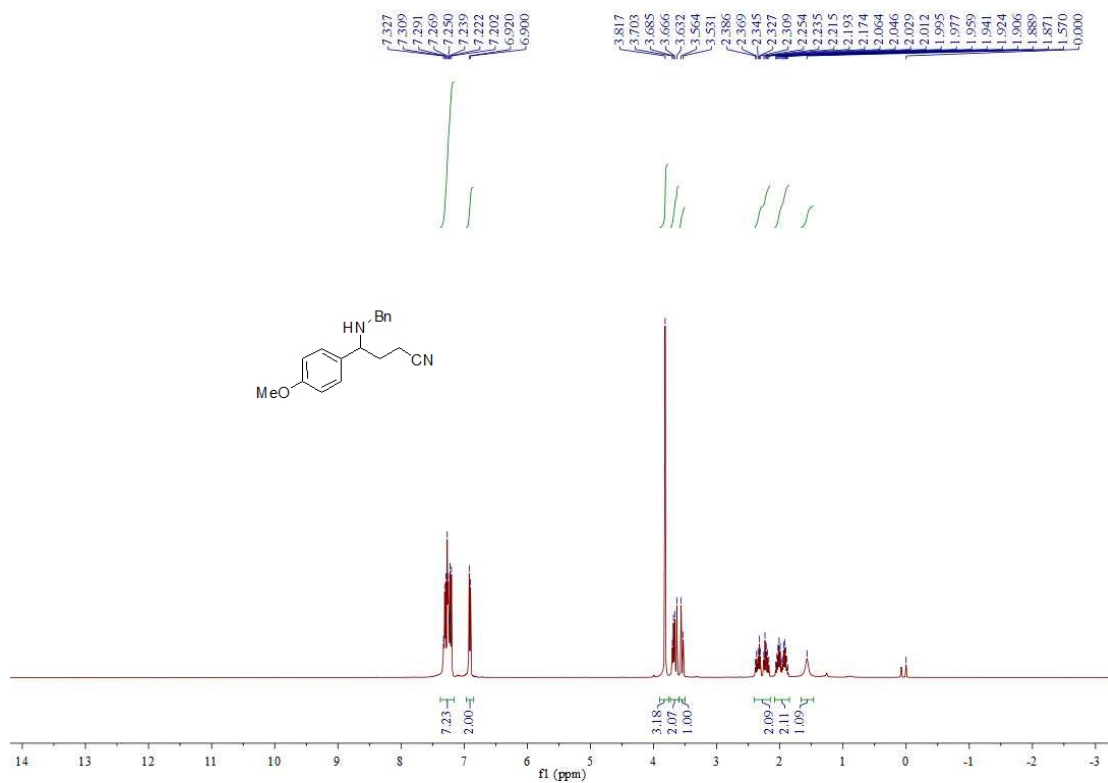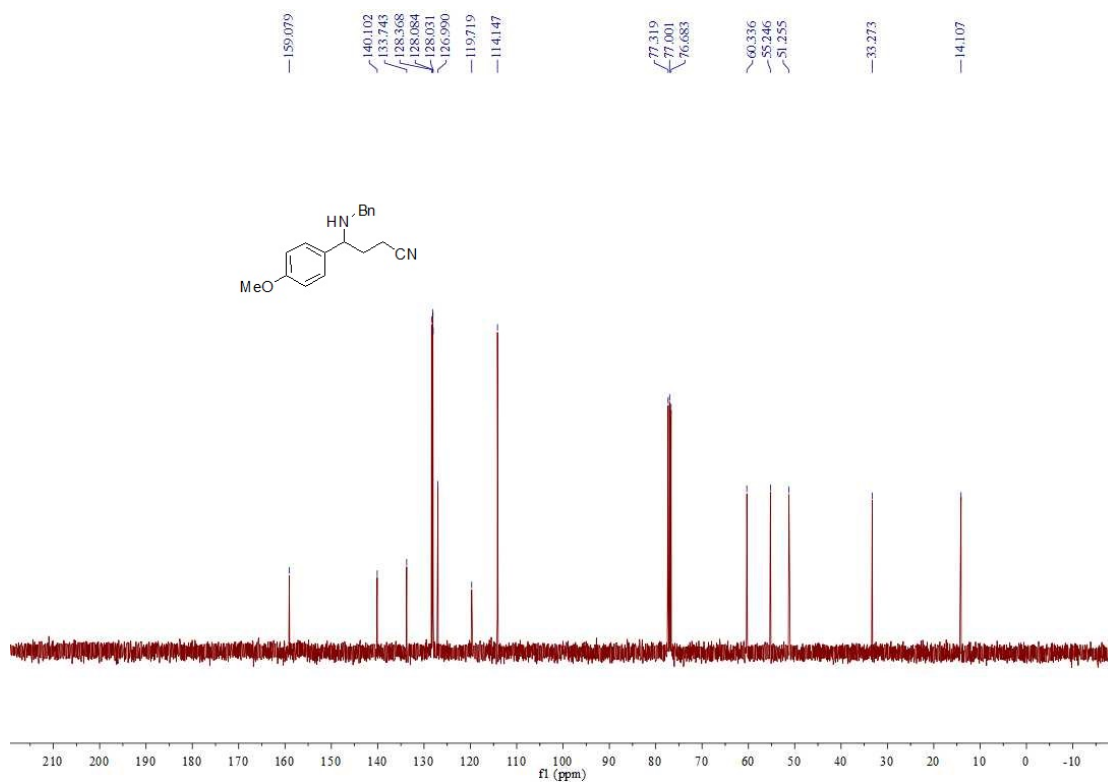

Supplementary Figure 11.  $^1\text{H}$ ,  $^{13}\text{C}$ -NMR spectra of product 14

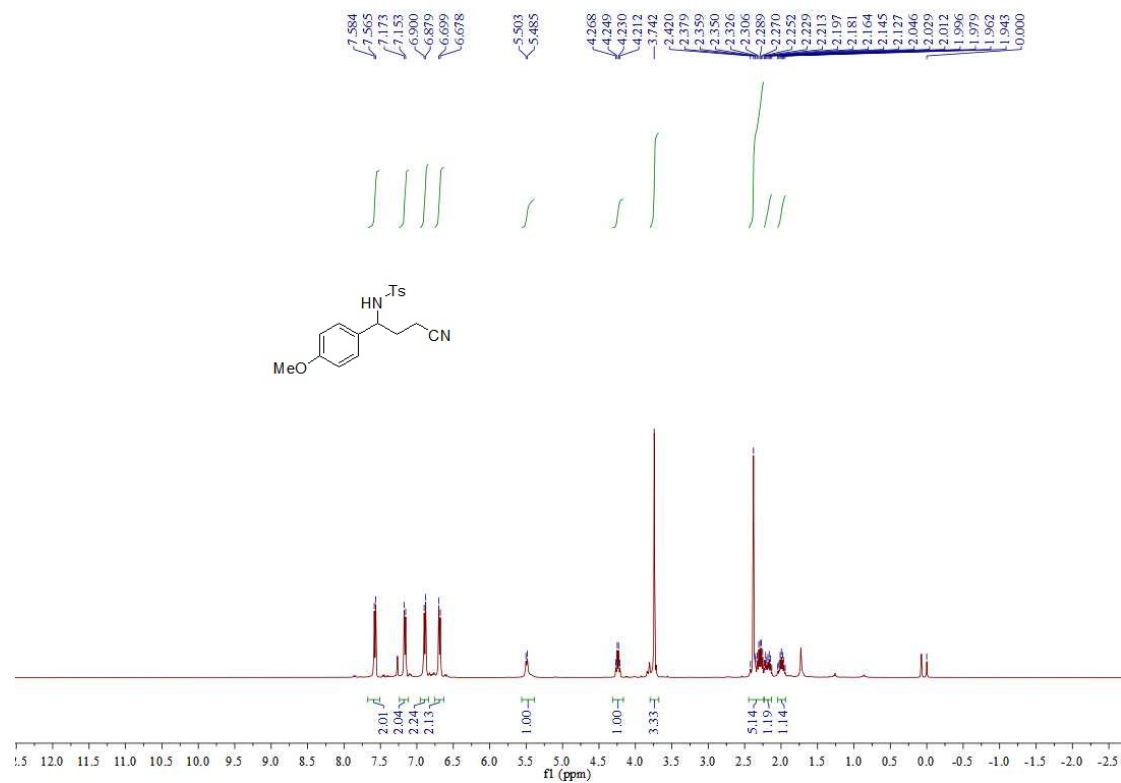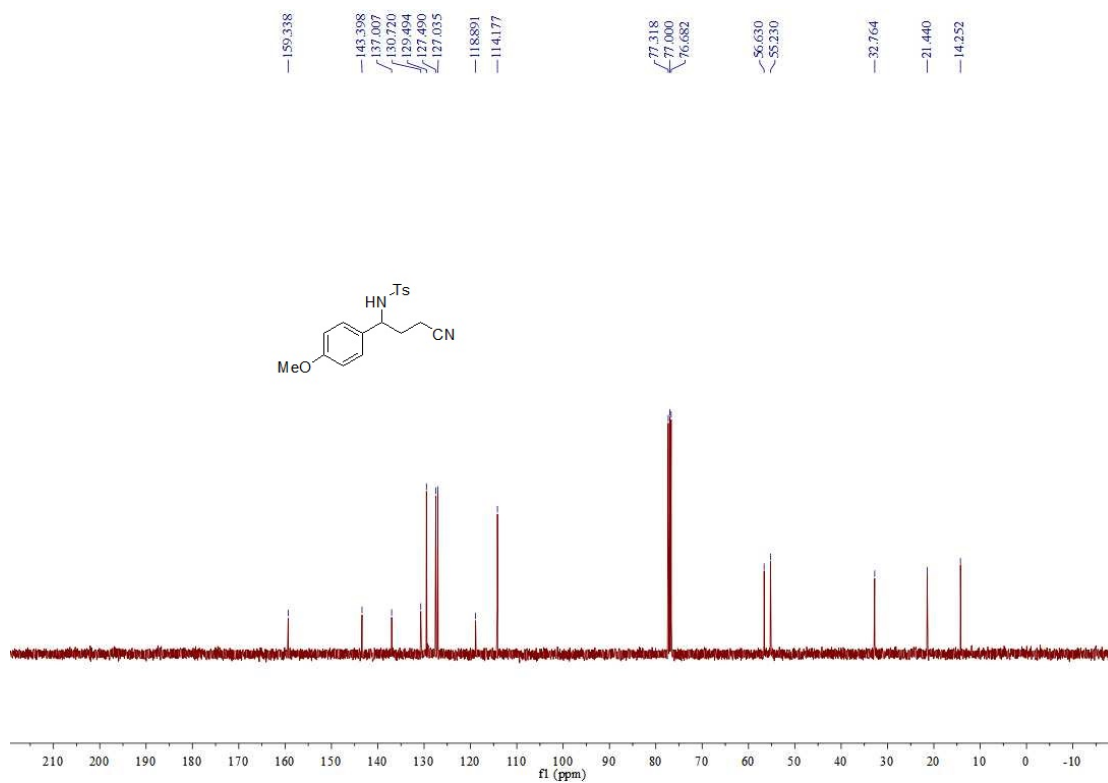

Supplementary Figure 12.  $^1\text{H}$ ,  $^{13}\text{C}$ -NMR spectra of product 15

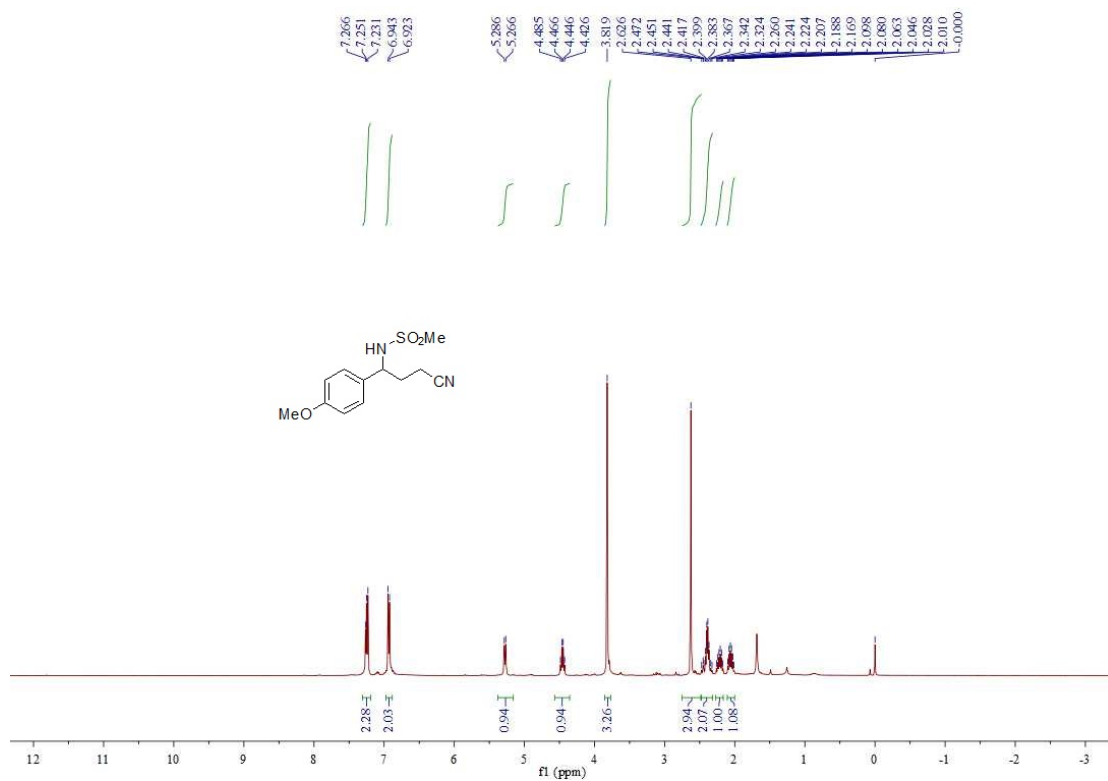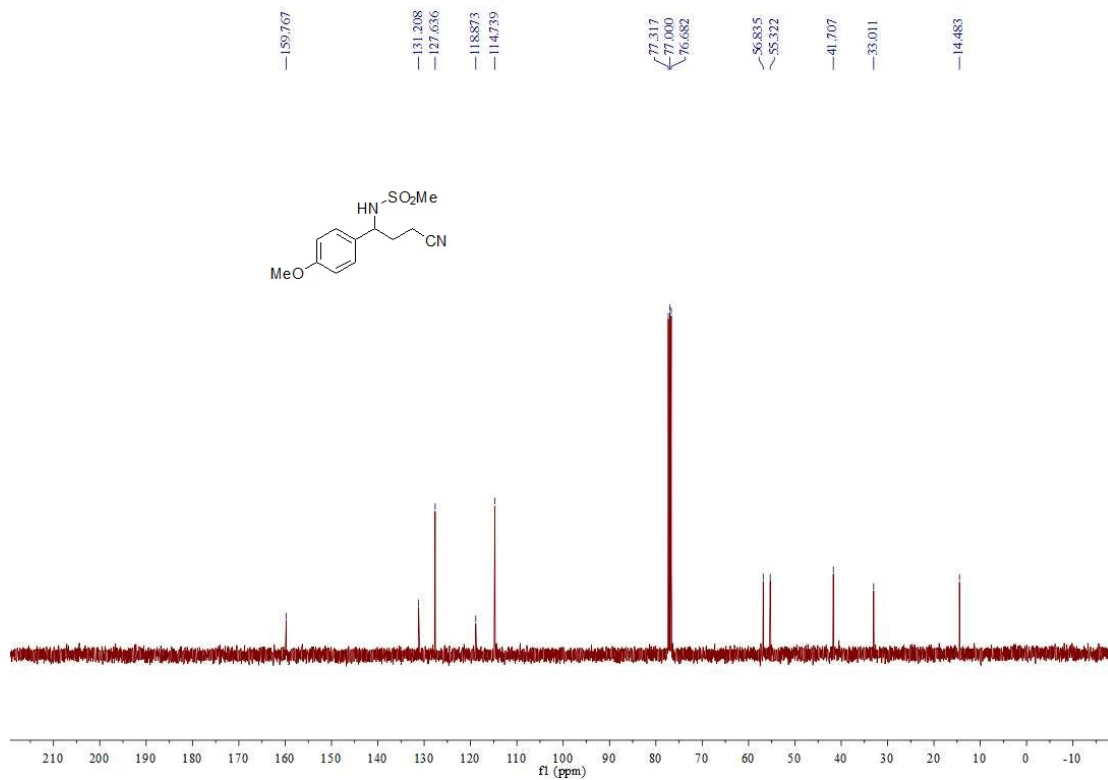

Supplementary Figure 13.  $^1\text{H}$ ,  $^{13}\text{C}$ -NMR spectra of product 17

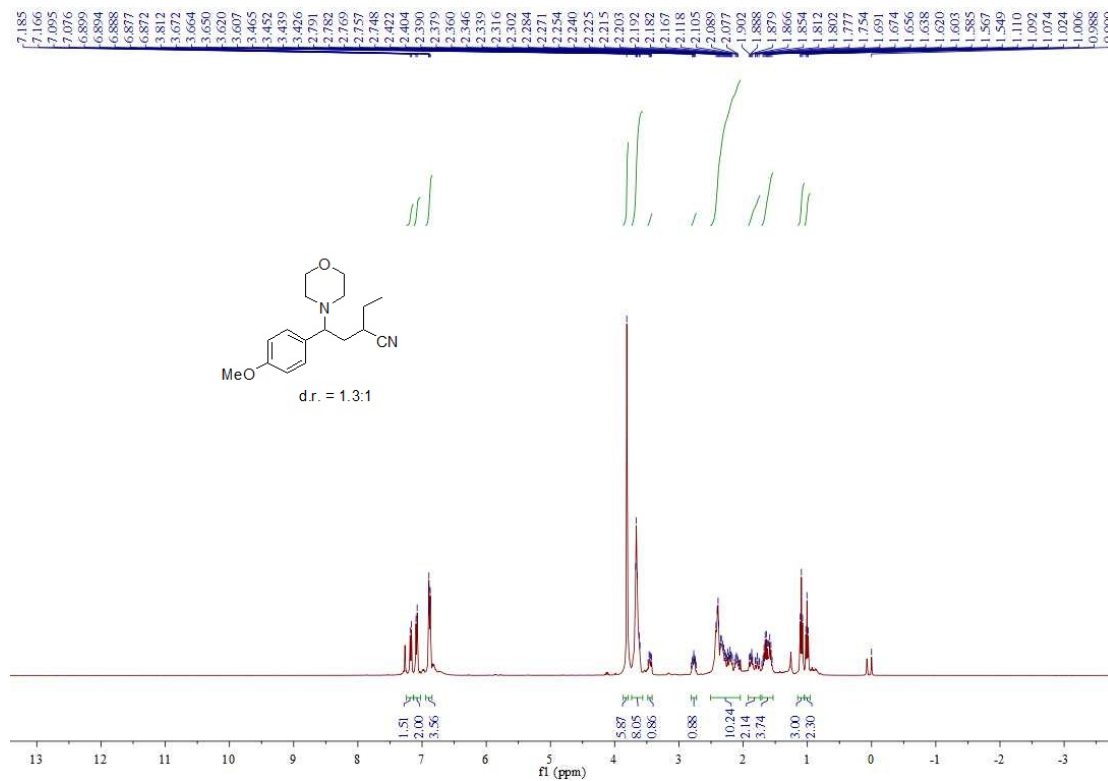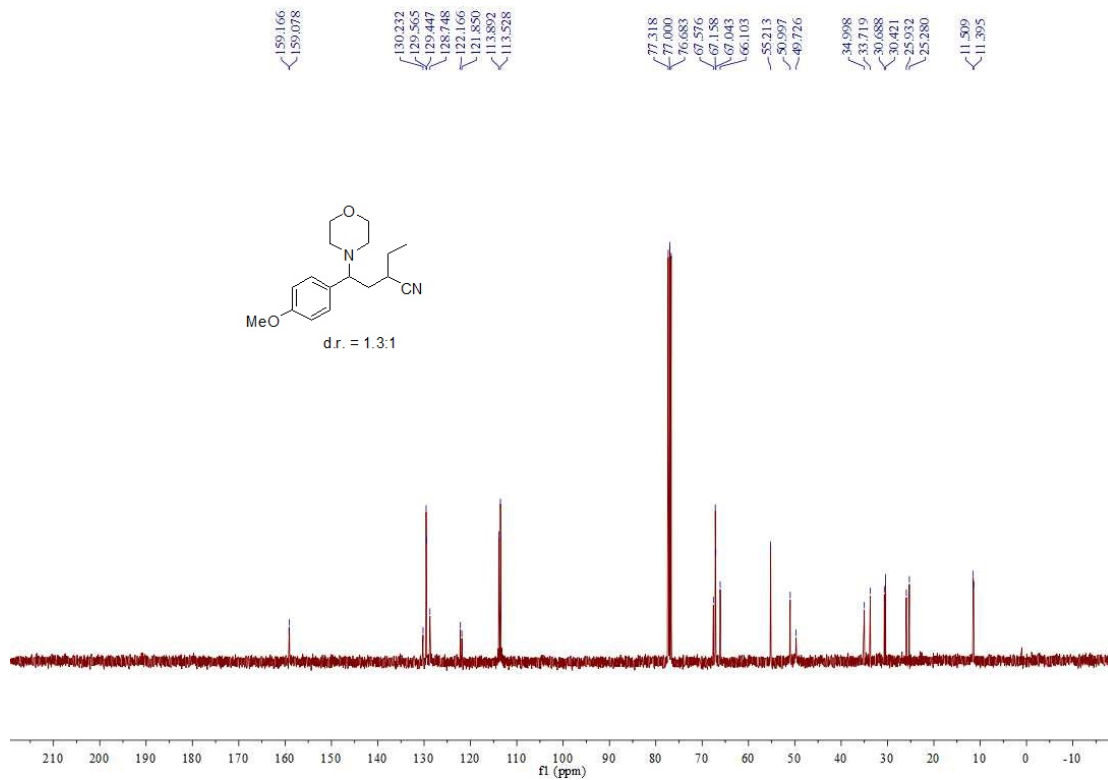

Supplementary Figure 14.  $^1\text{H}$ ,  $^{13}\text{C}$ -NMR spectra of product **18**

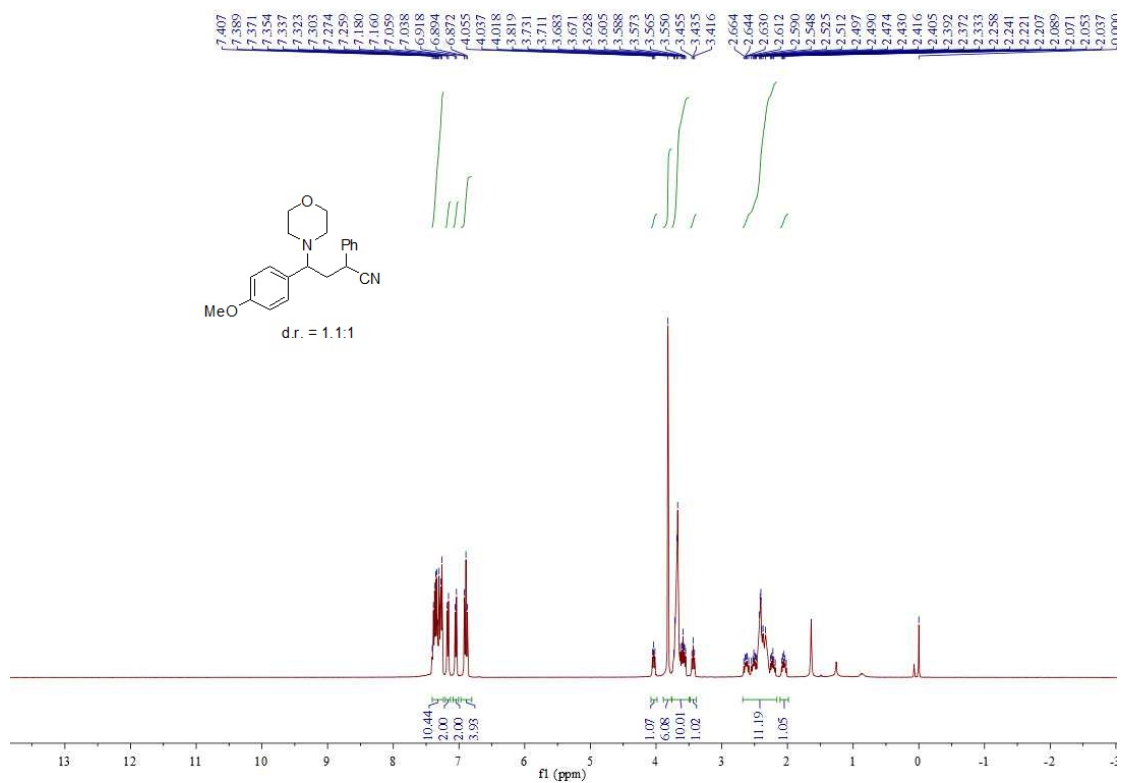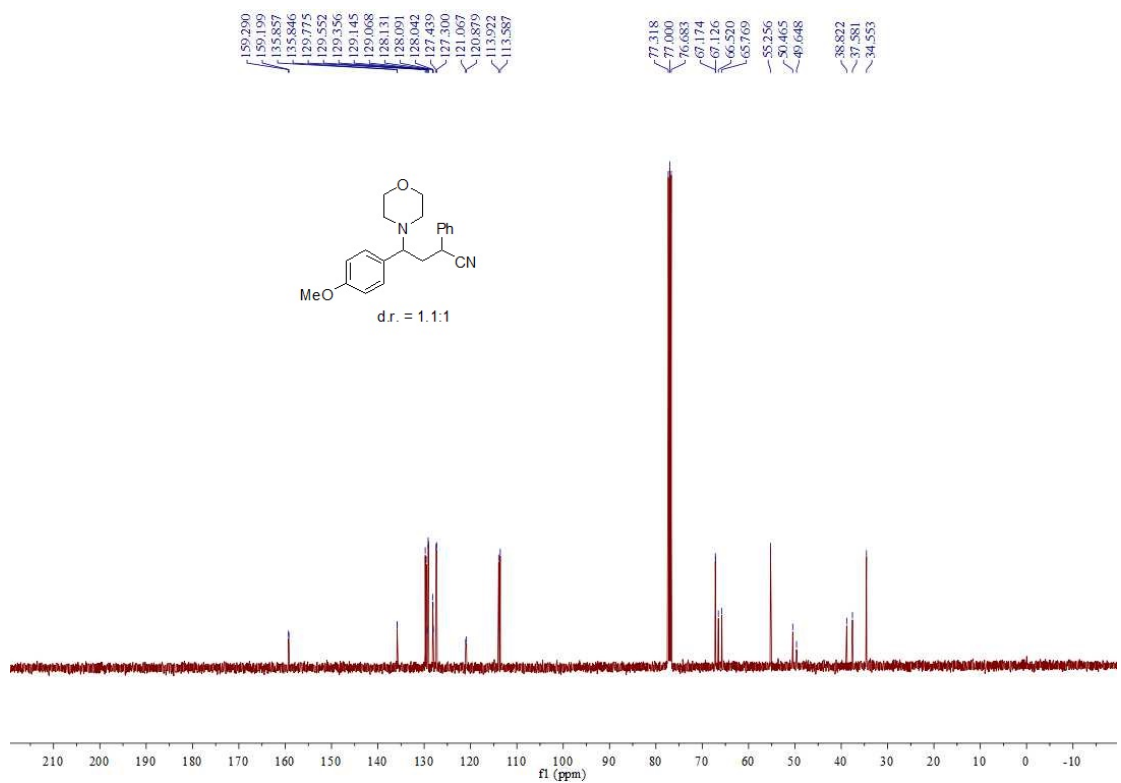



Supplementary Figure 15.  $^1\text{H}$ ,  $^{13}\text{C}$ -NMR spectra of product 19

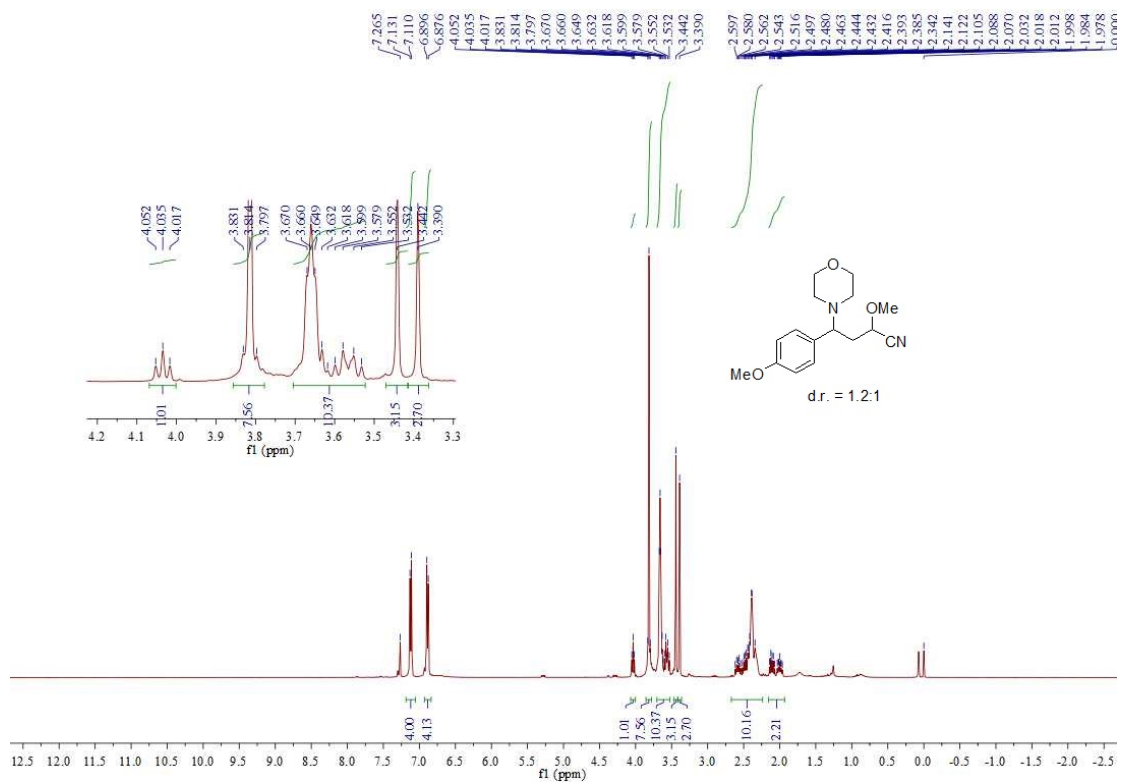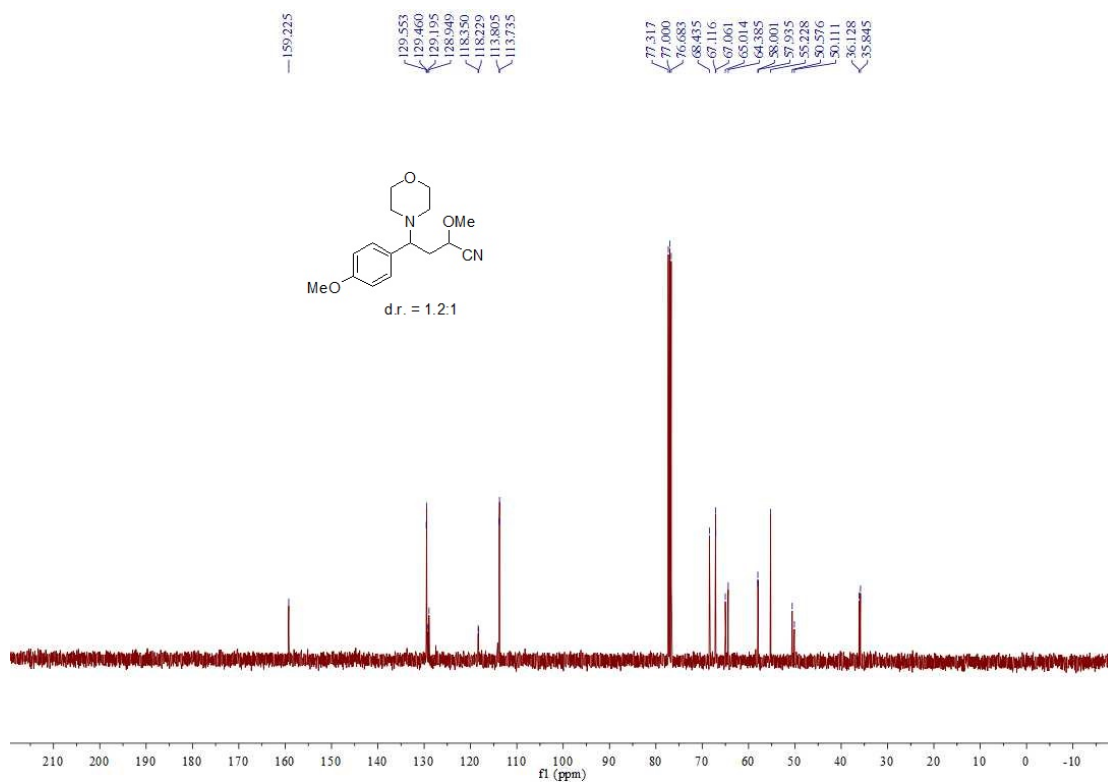

Supplementary Figure 16. <sup>1</sup>H, <sup>13</sup>C-NMR spectra of product 20

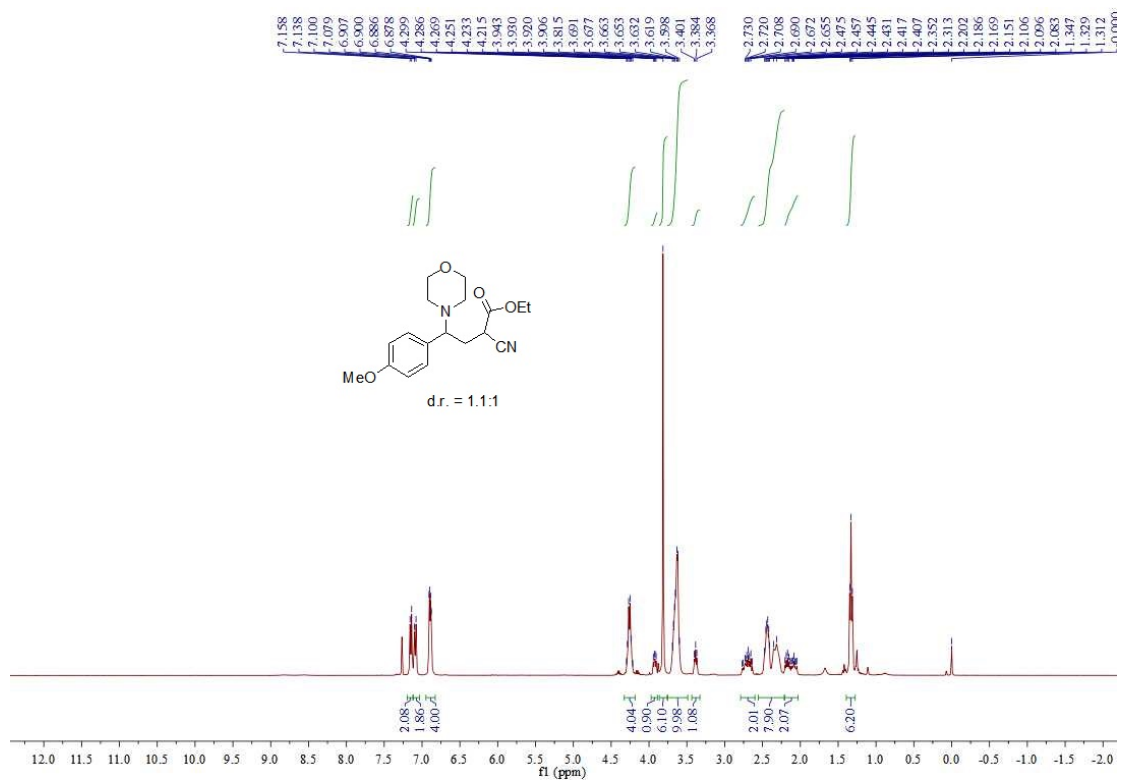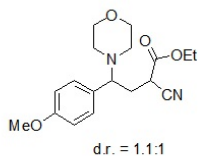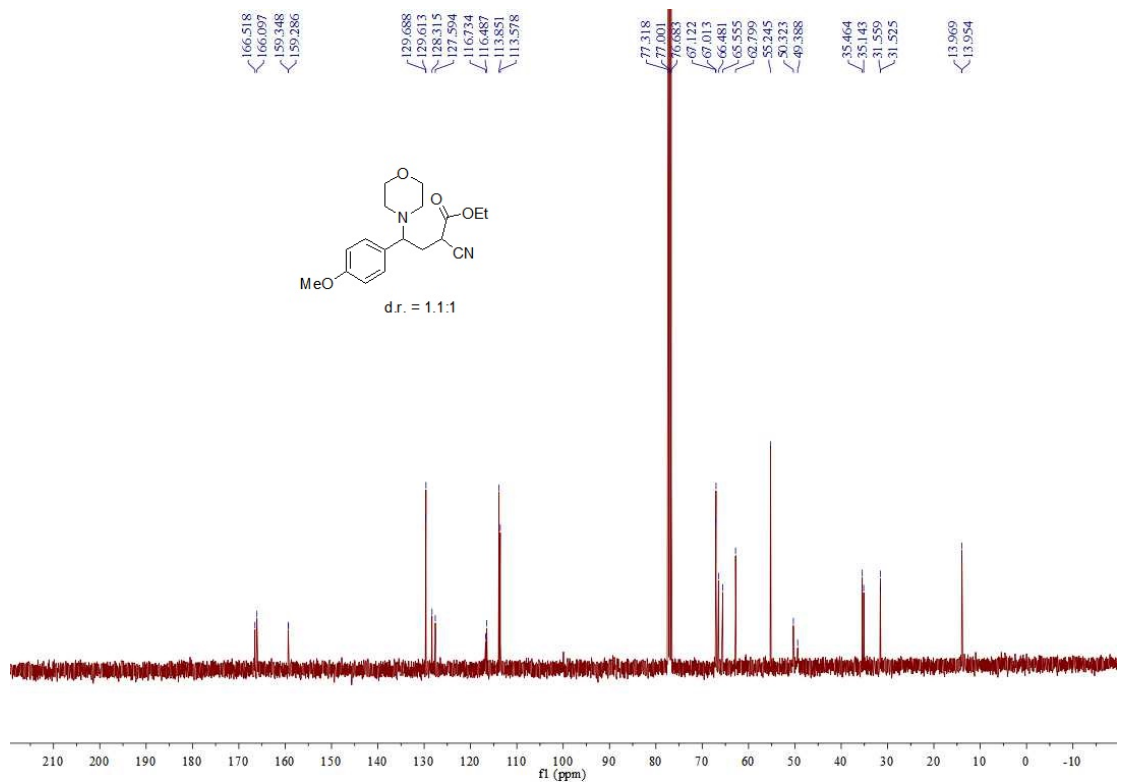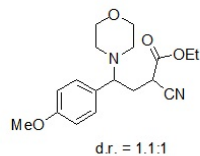

Supplementary Figure 17.  $^1\text{H}$ ,  $^{13}\text{C}$ -NMR spectra of product 21

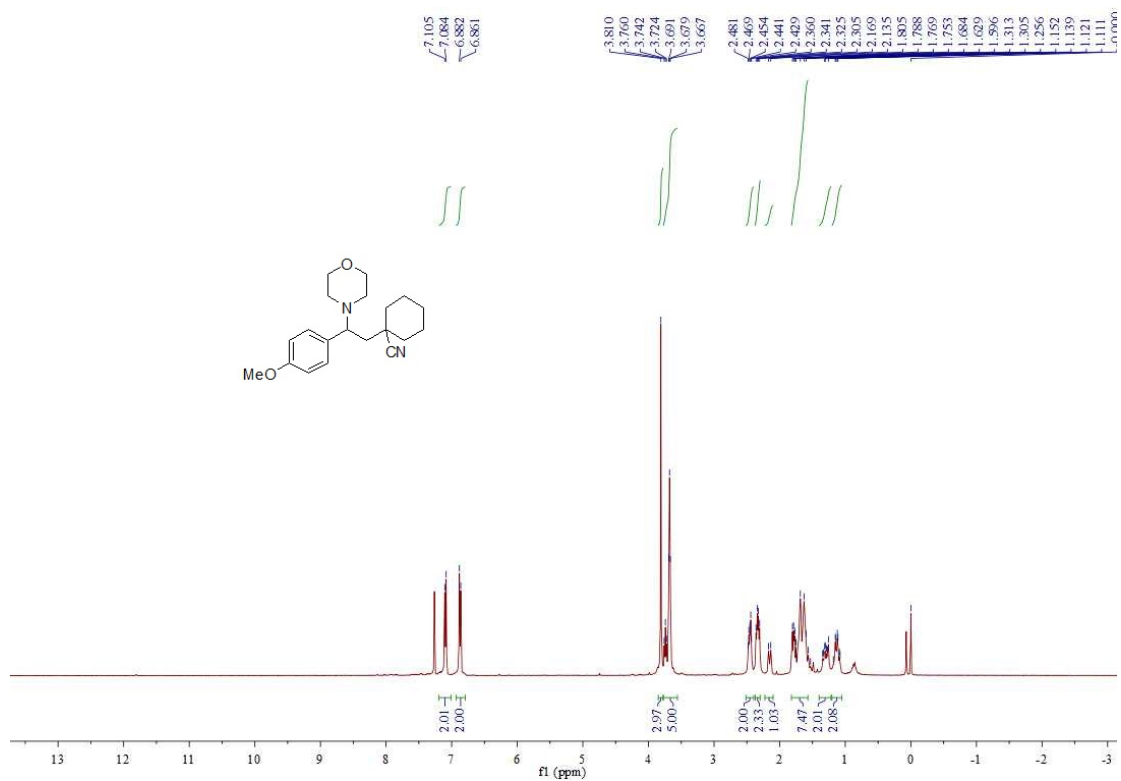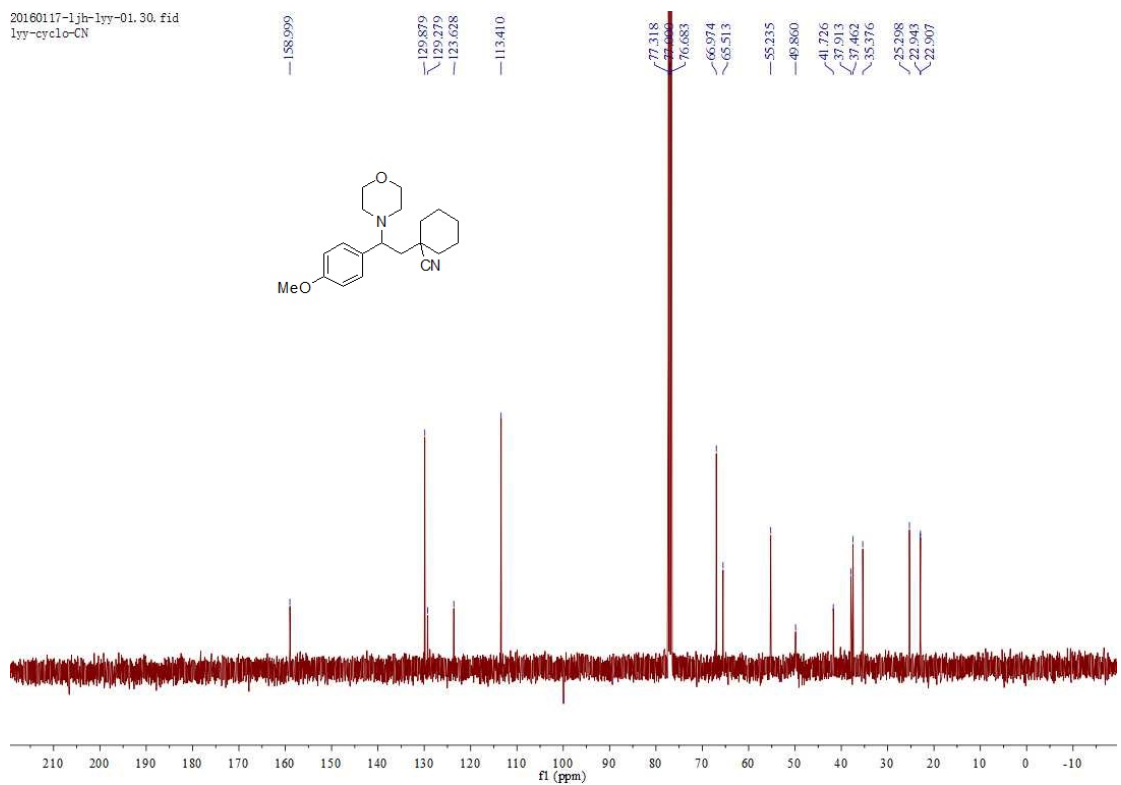

Supplementary Figure 18.  $^1\text{H}$ ,  $^{13}\text{C}$ -NMR spectra of product **22**

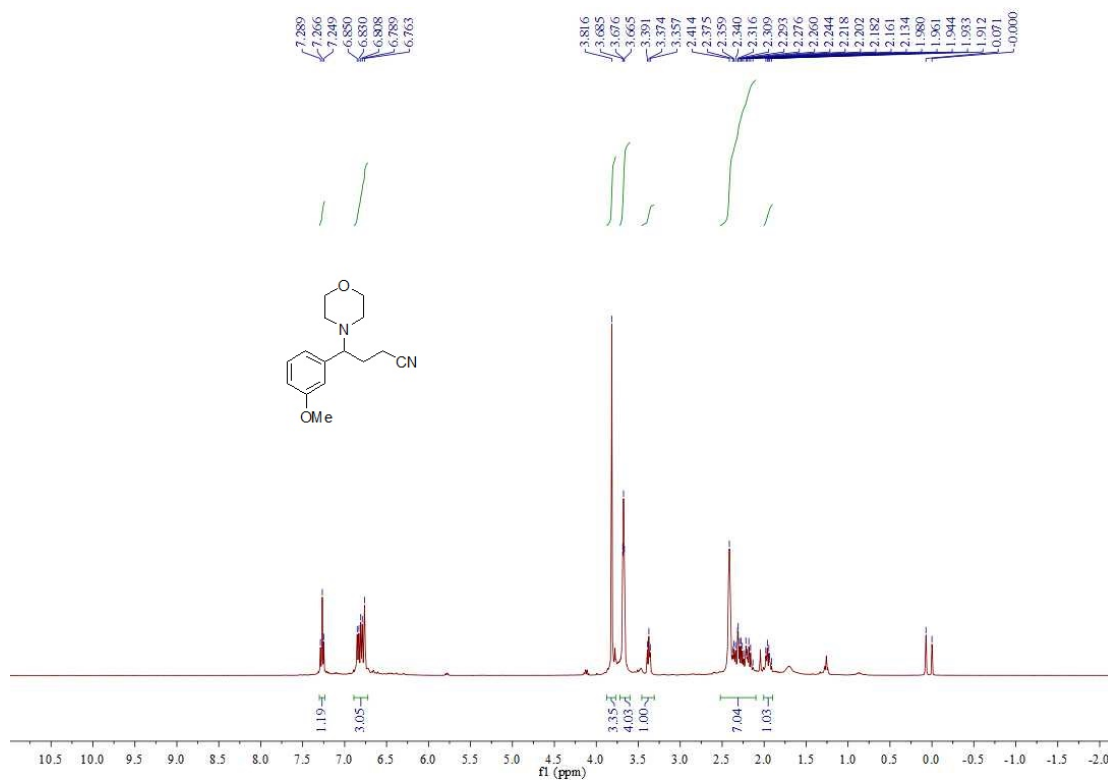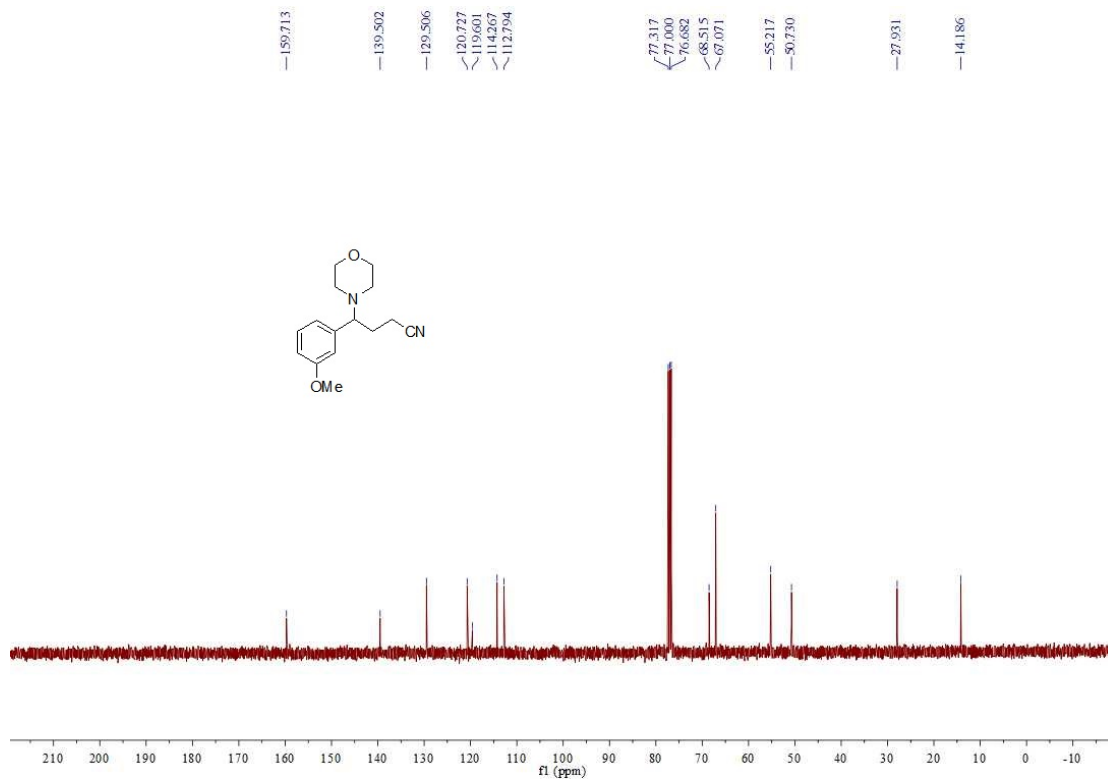

Supplementary Figure 19.  $^1\text{H}$ ,  $^{13}\text{C}$ -NMR spectra of product **23**

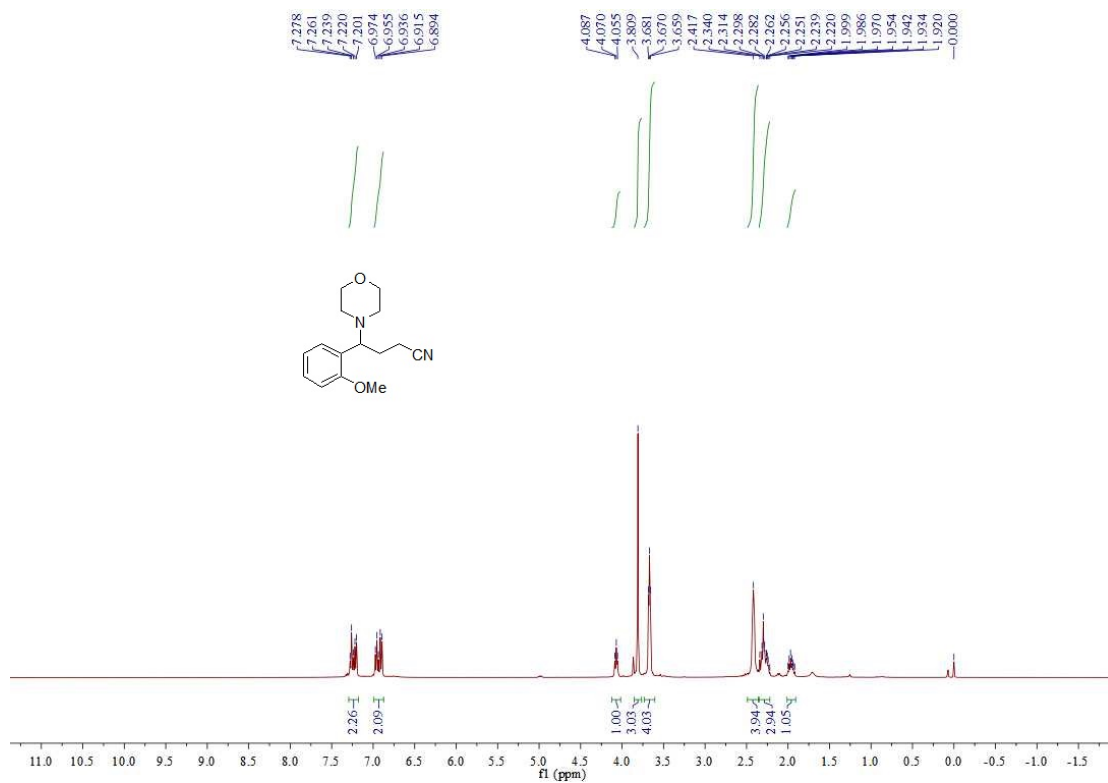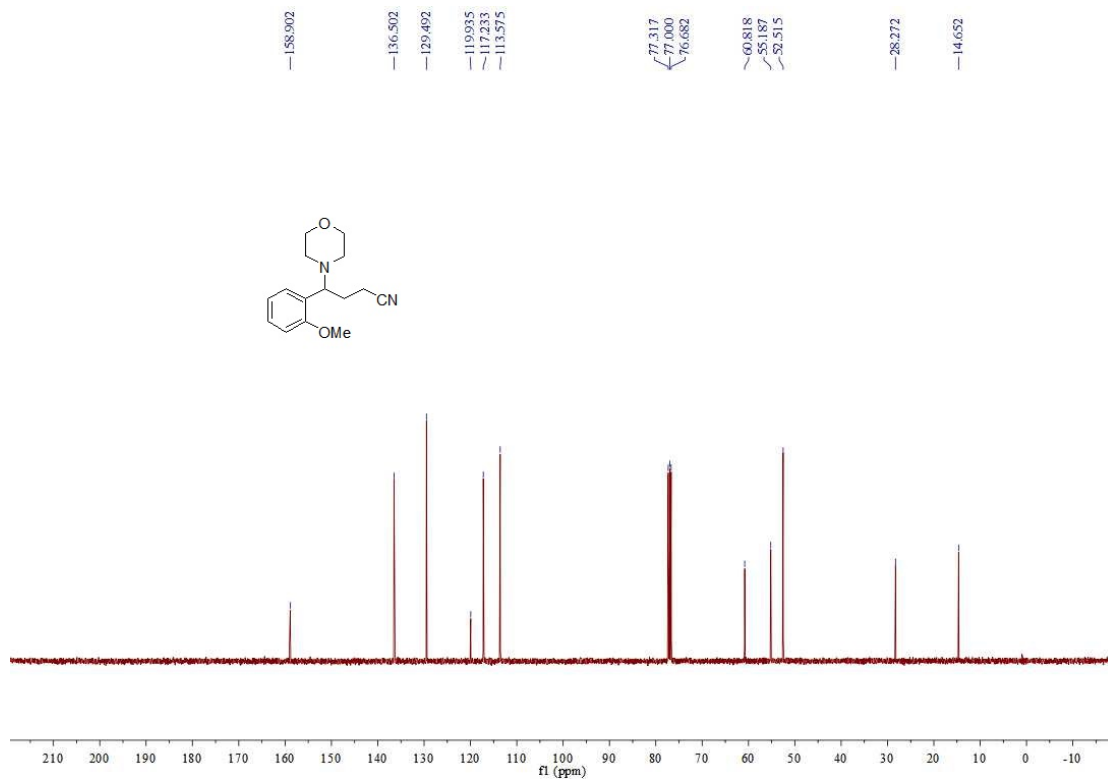

Supplementary Figure 20.  $^1\text{H}$ ,  $^{13}\text{C}$ -NMR spectra of product 24

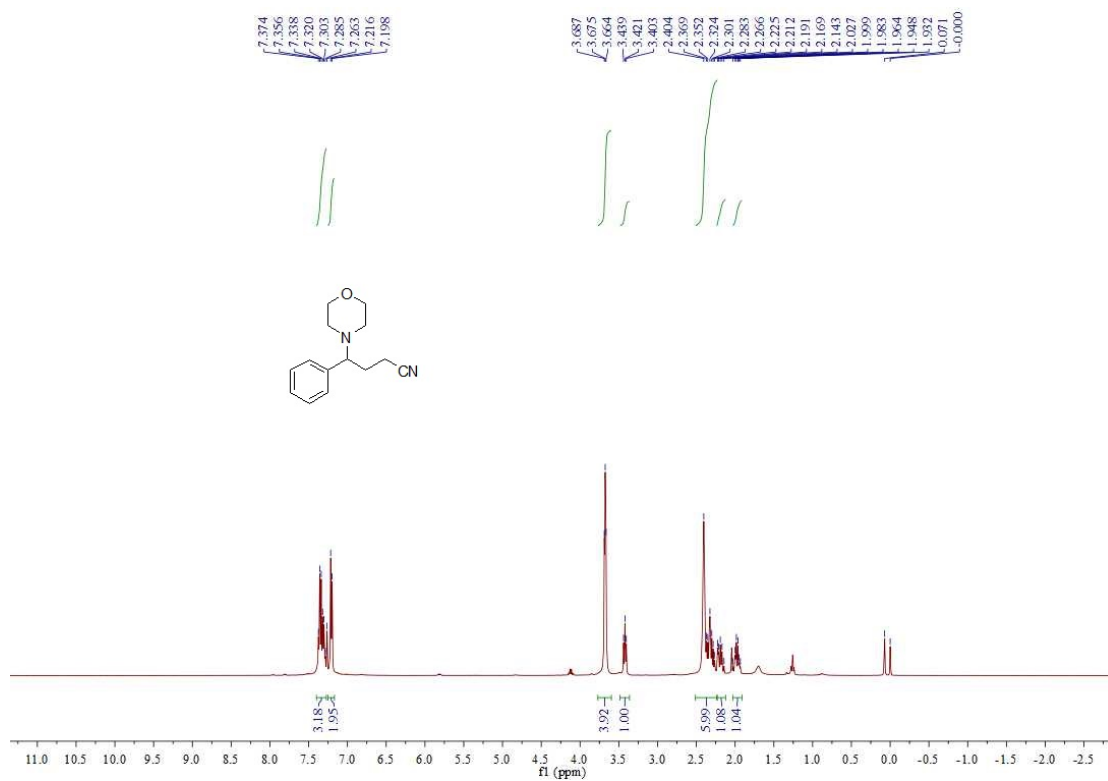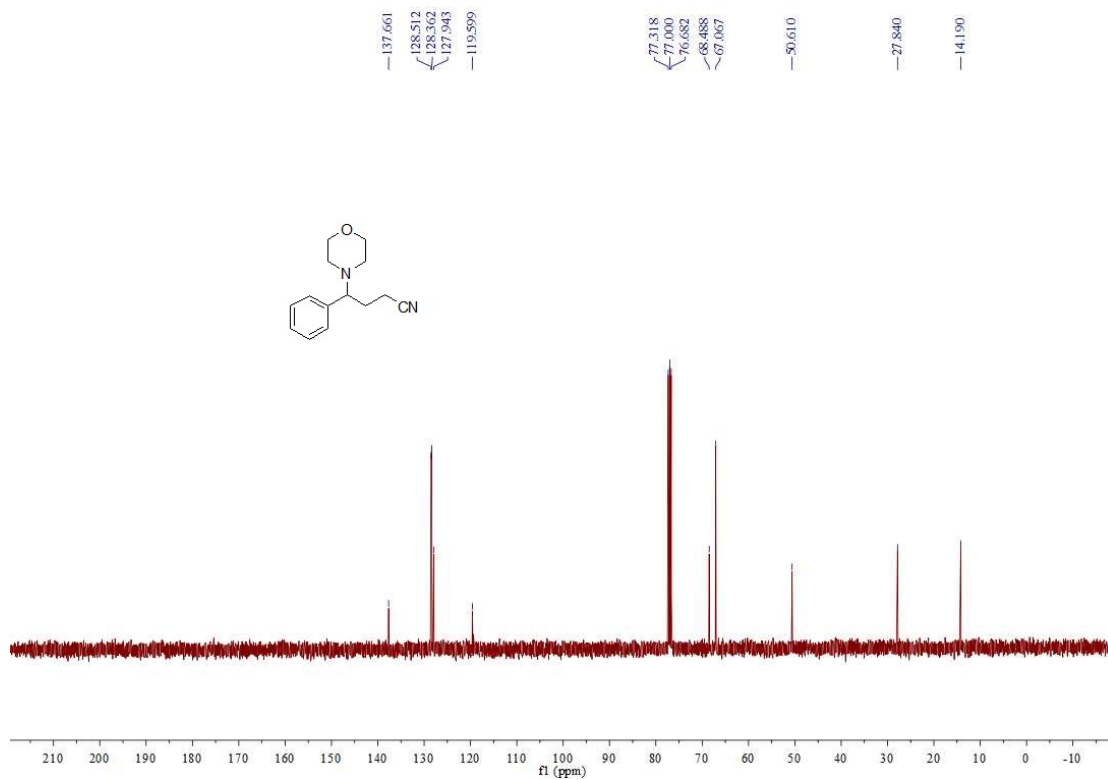

Supplementary Figure 21.  $^1\text{H}$ ,  $^{13}\text{C}$ -NMR spectra of product 25

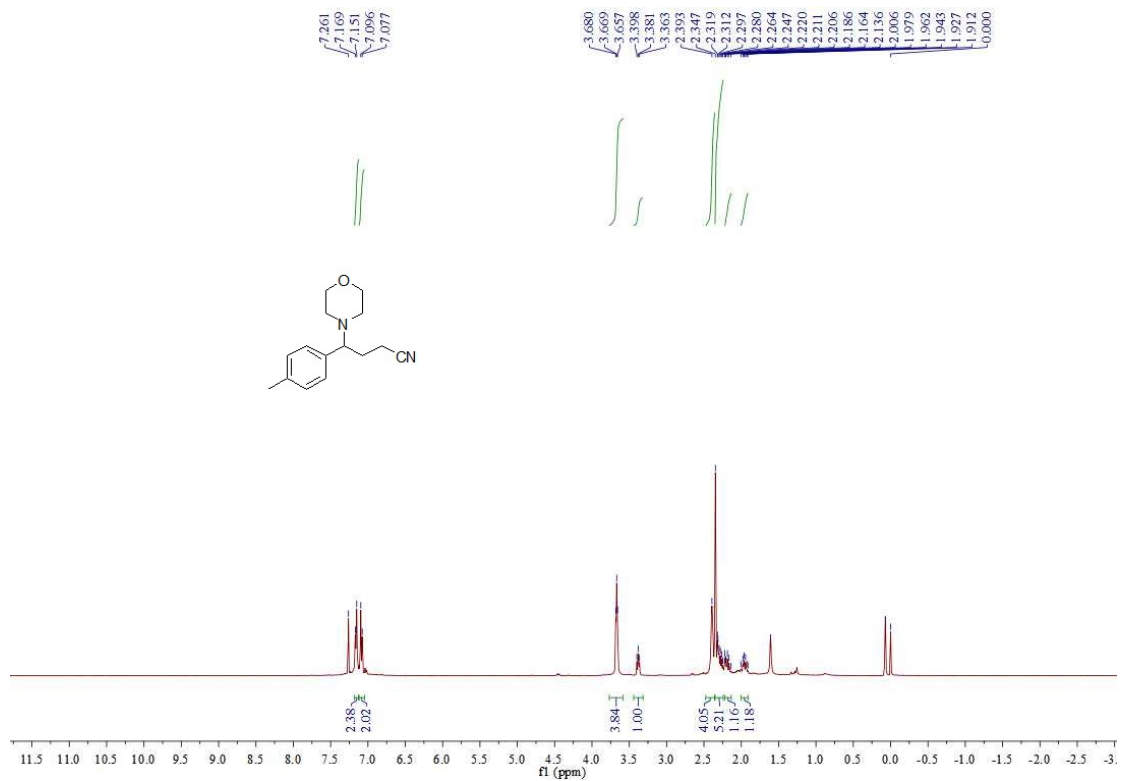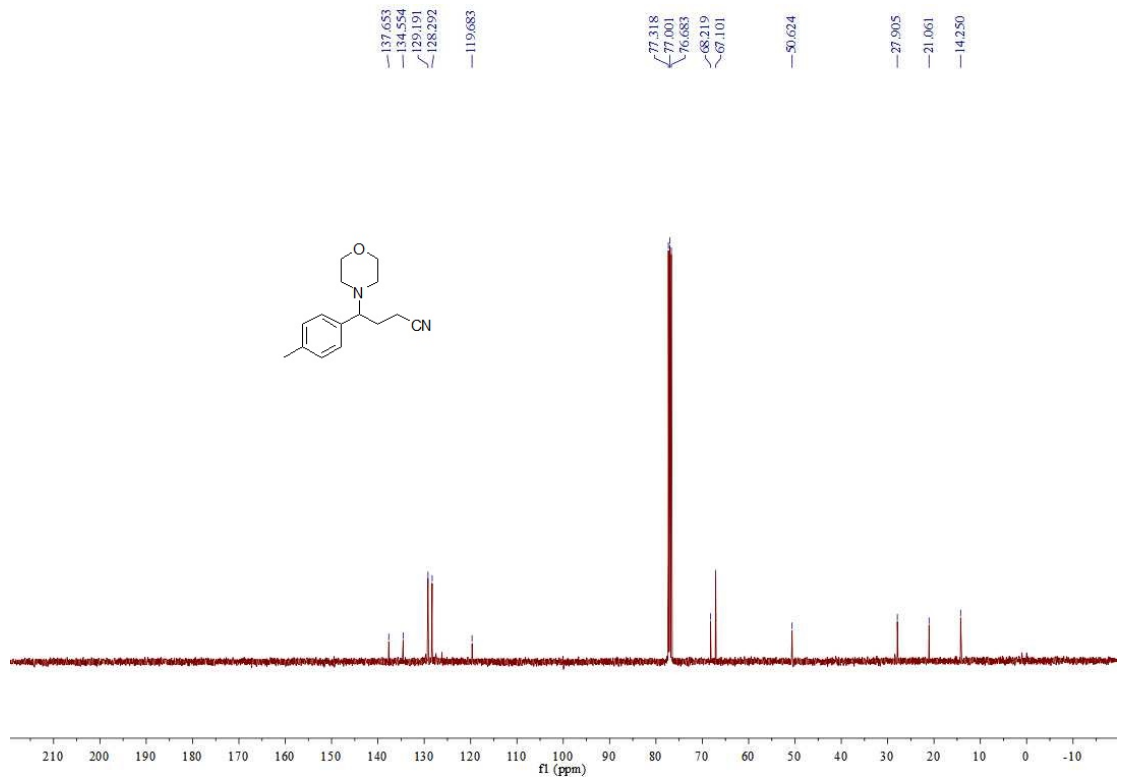

Supplementary Figure 22.  $^1\text{H}$ ,  $^{13}\text{C}$ -NMR spectra of product 26

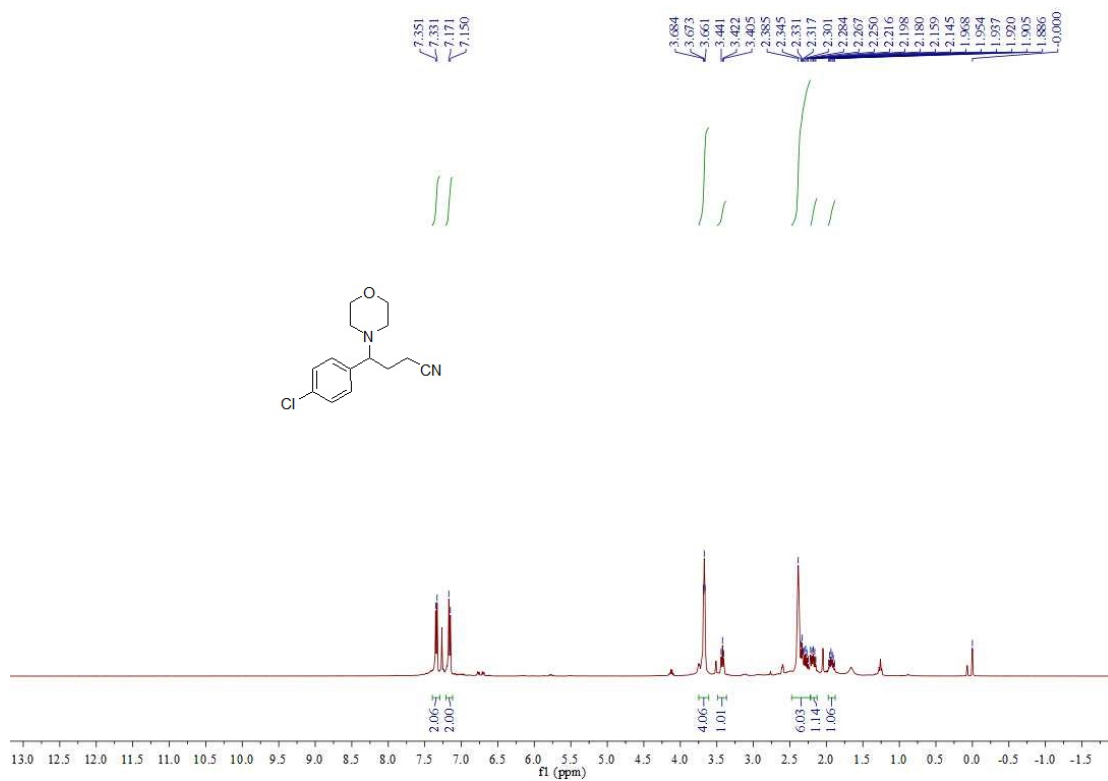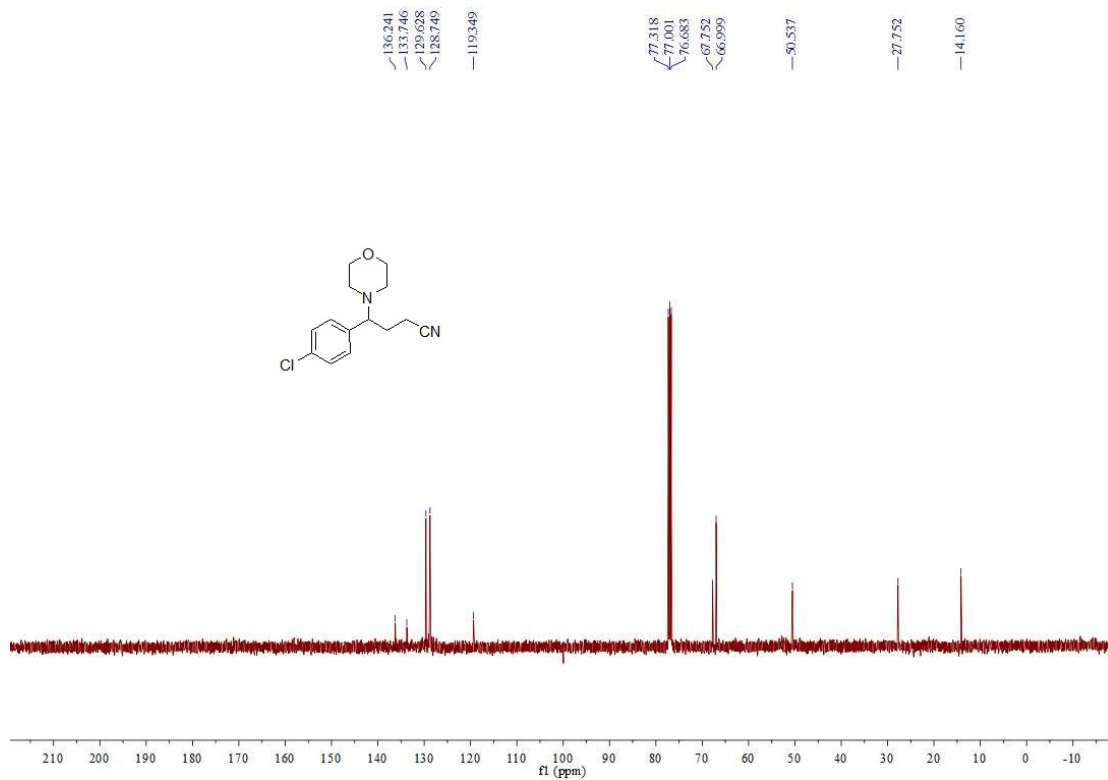



Supplementary Figure 23.  $^1\text{H}$ ,  $^{13}\text{C}$ -NMR spectra of product 28

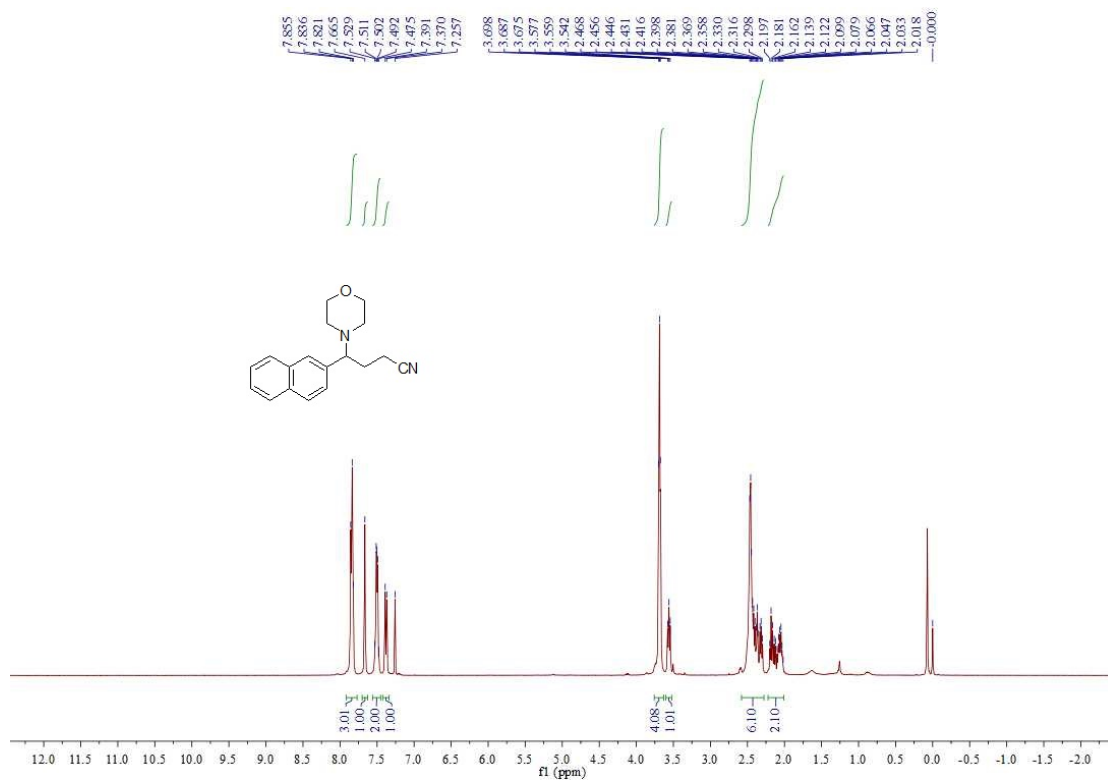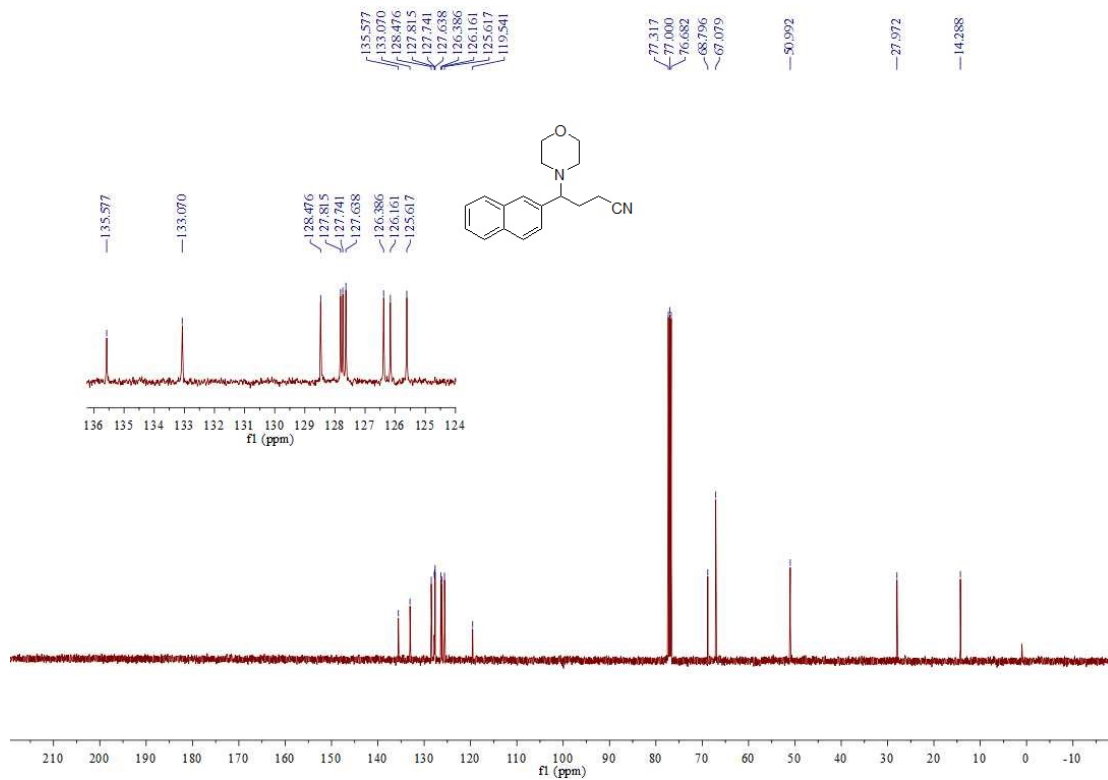

Supplementary Figure 24.  $^1\text{H}$ ,  $^{13}\text{C}$ -NMR spectra of product 29

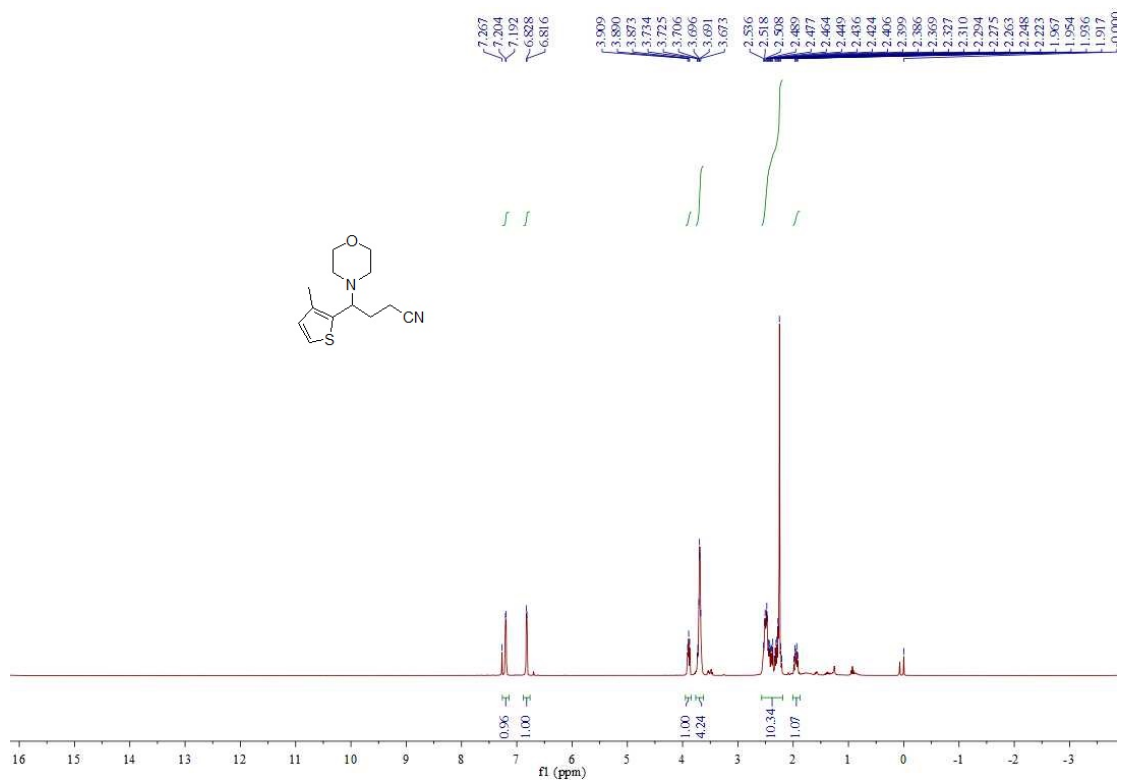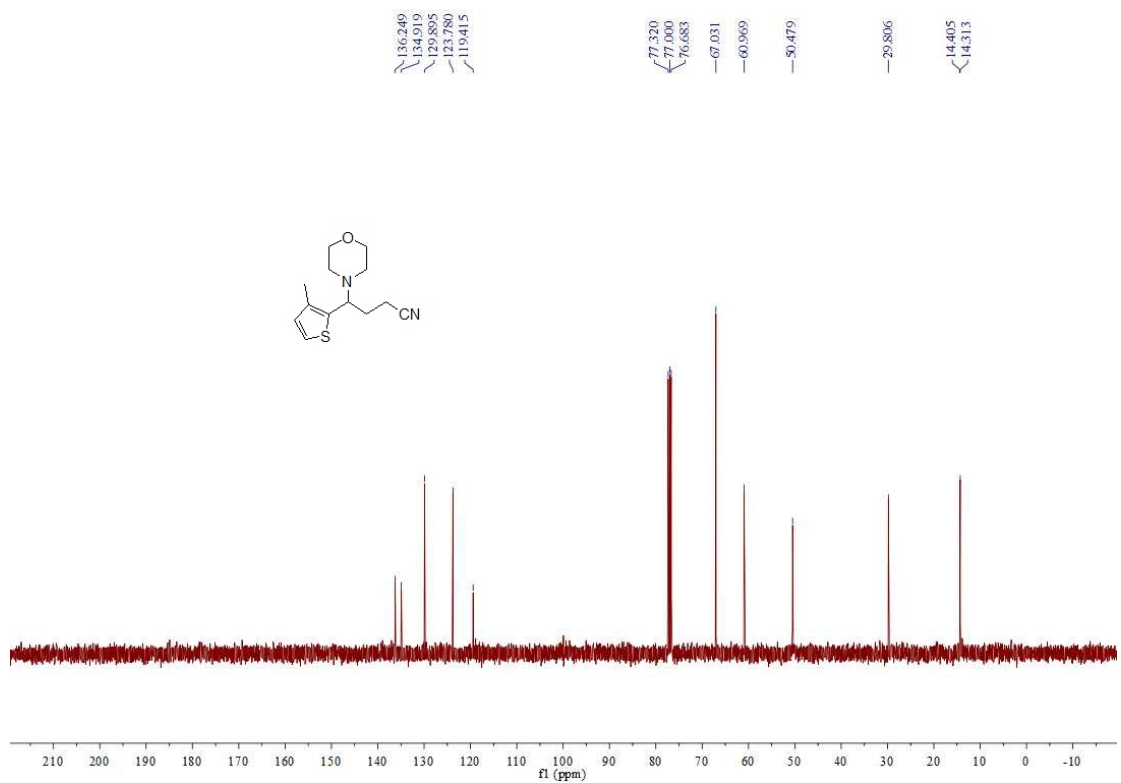

Supplementary Figure 25.  $^1\text{H}$ ,  $^{13}\text{C}$ -NMR spectra of product **31**

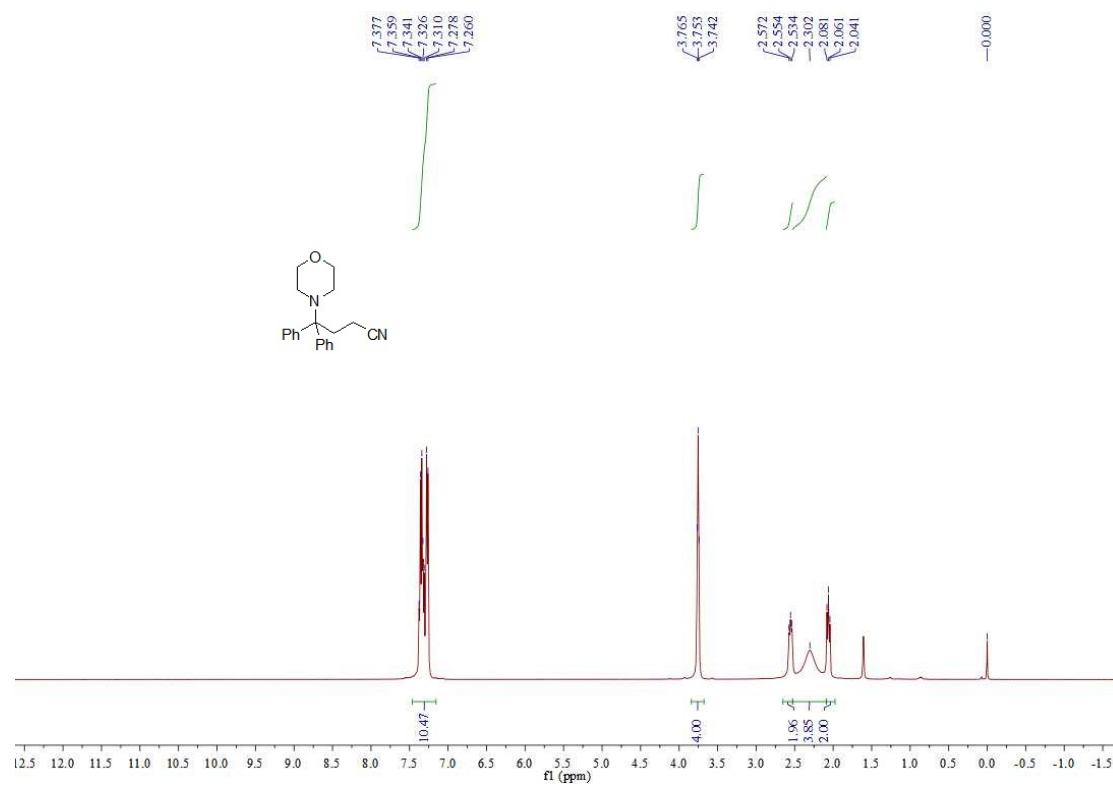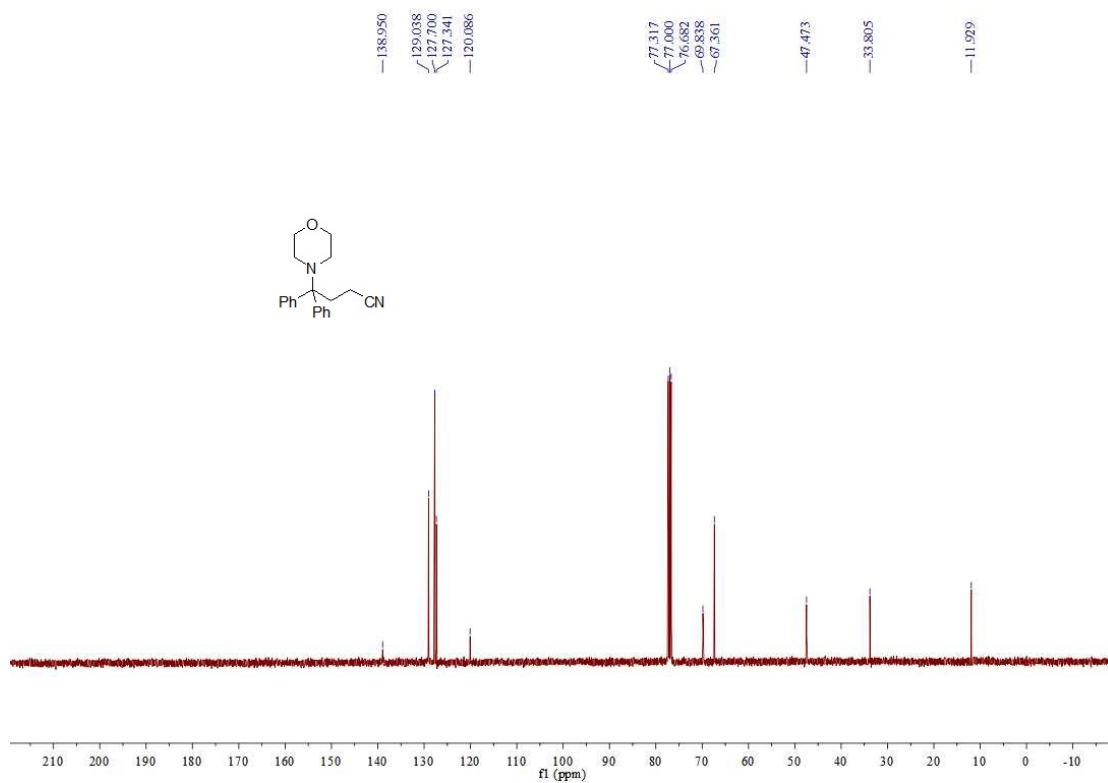

Supplementary Figure 26.  $^1\text{H}$ ,  $^{13}\text{C}$ -NMR spectra of product 32

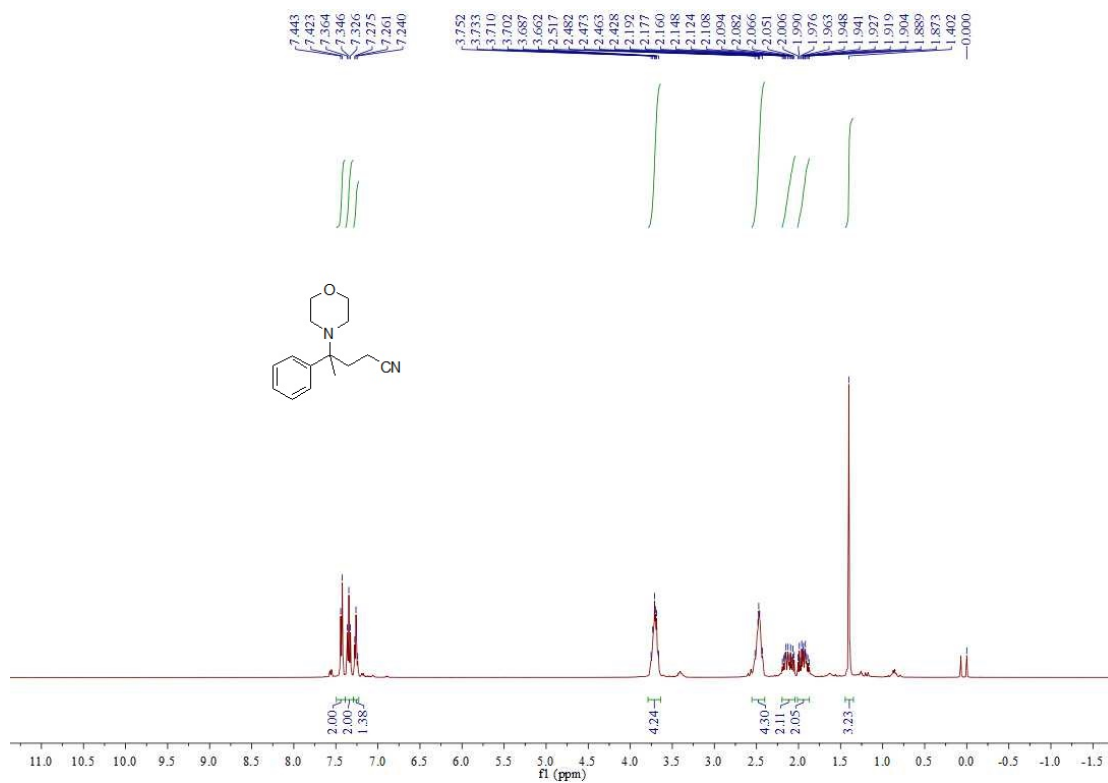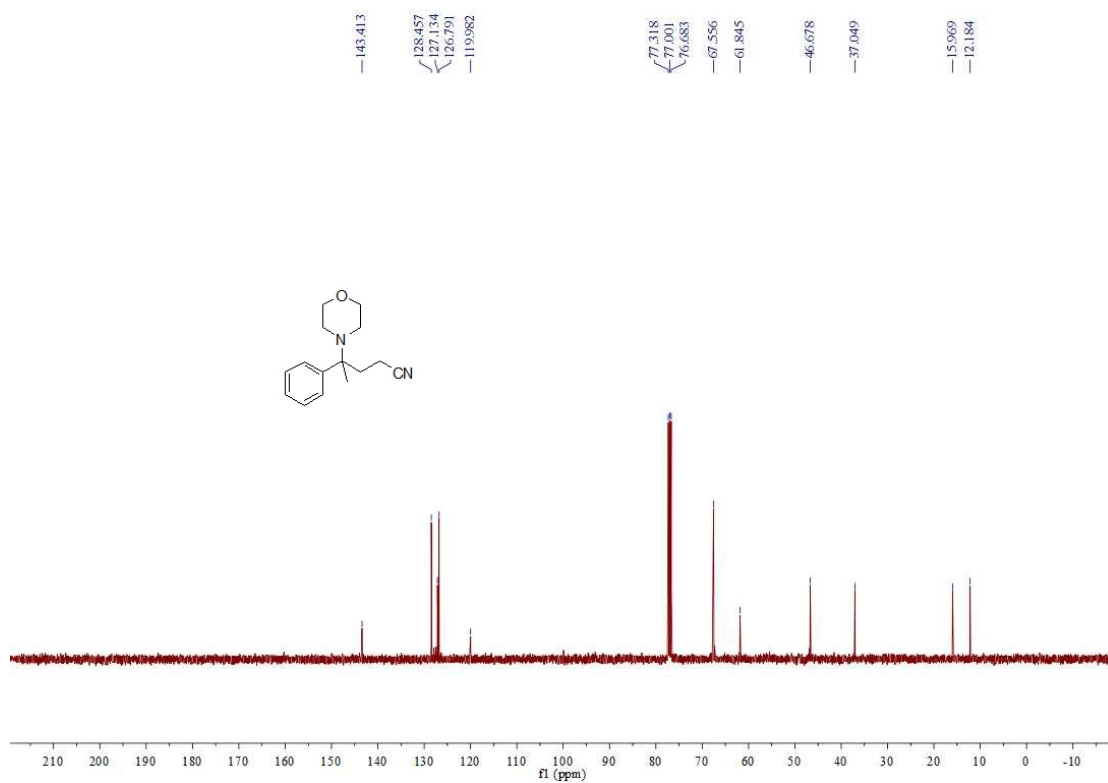

Supplementary Figure 27.  $^1\text{H}$ ,  $^{13}\text{C}$ -NMR spectra of product **33**

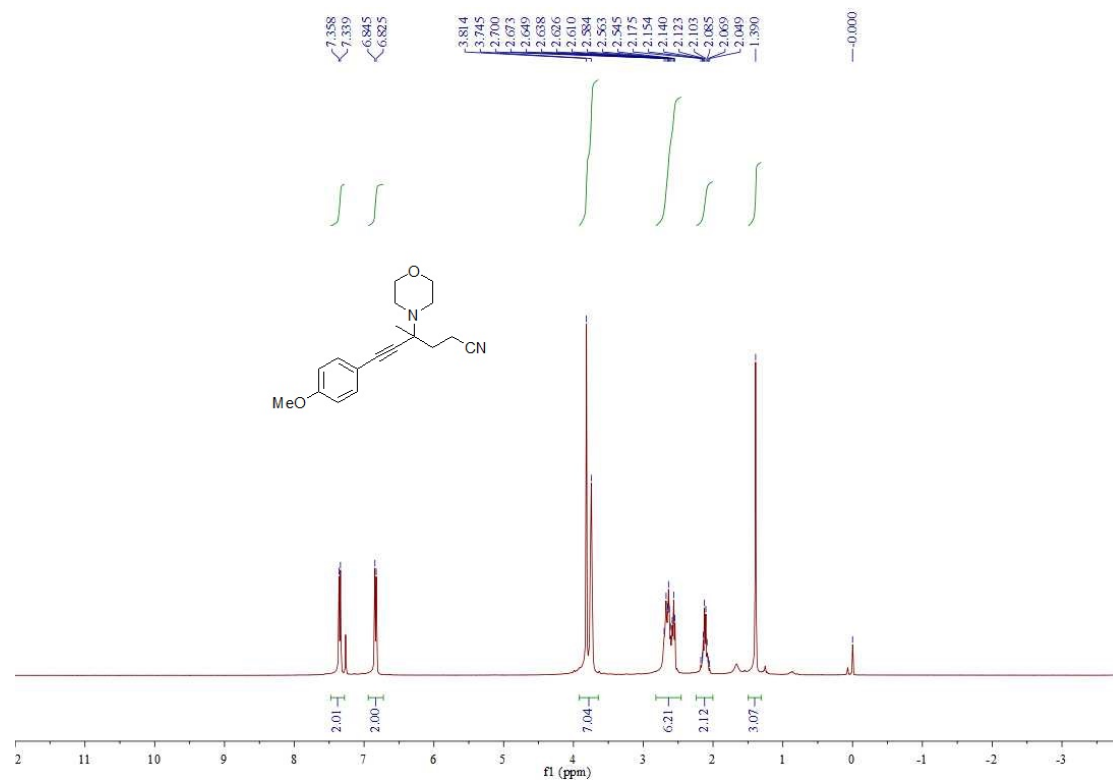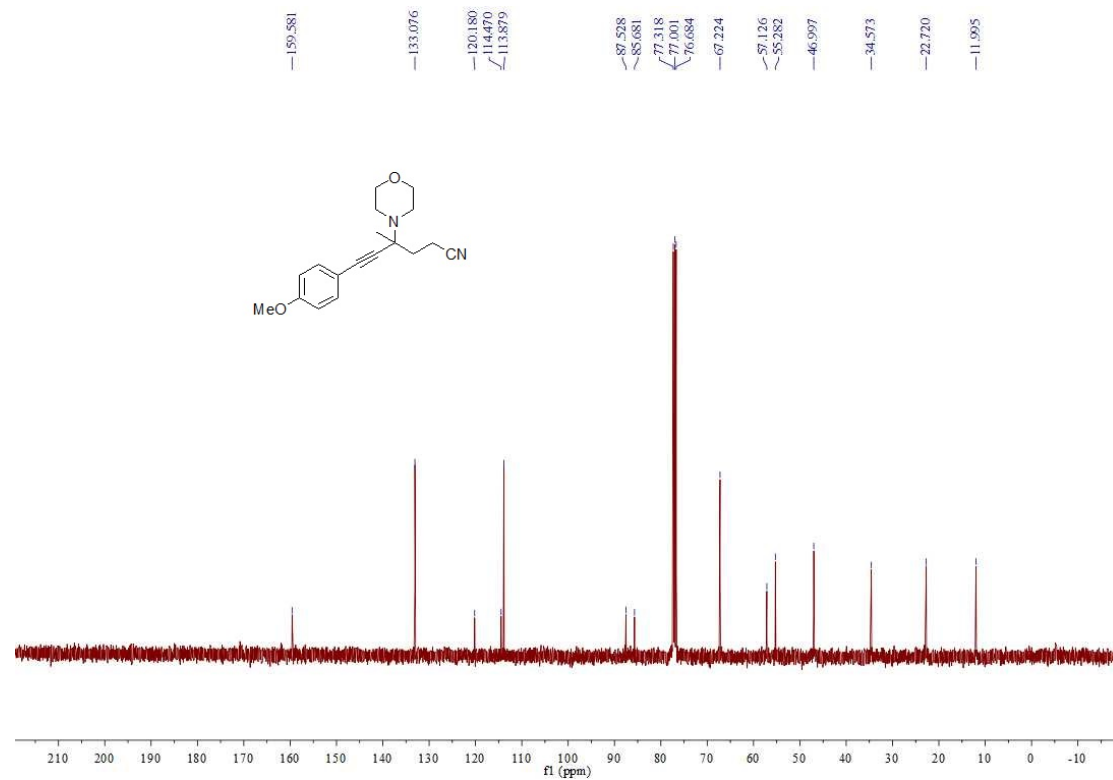

Supplementary Figure 28.  $^1\text{H}$ ,  $^{13}\text{C}$ -NMR spectra of product 34

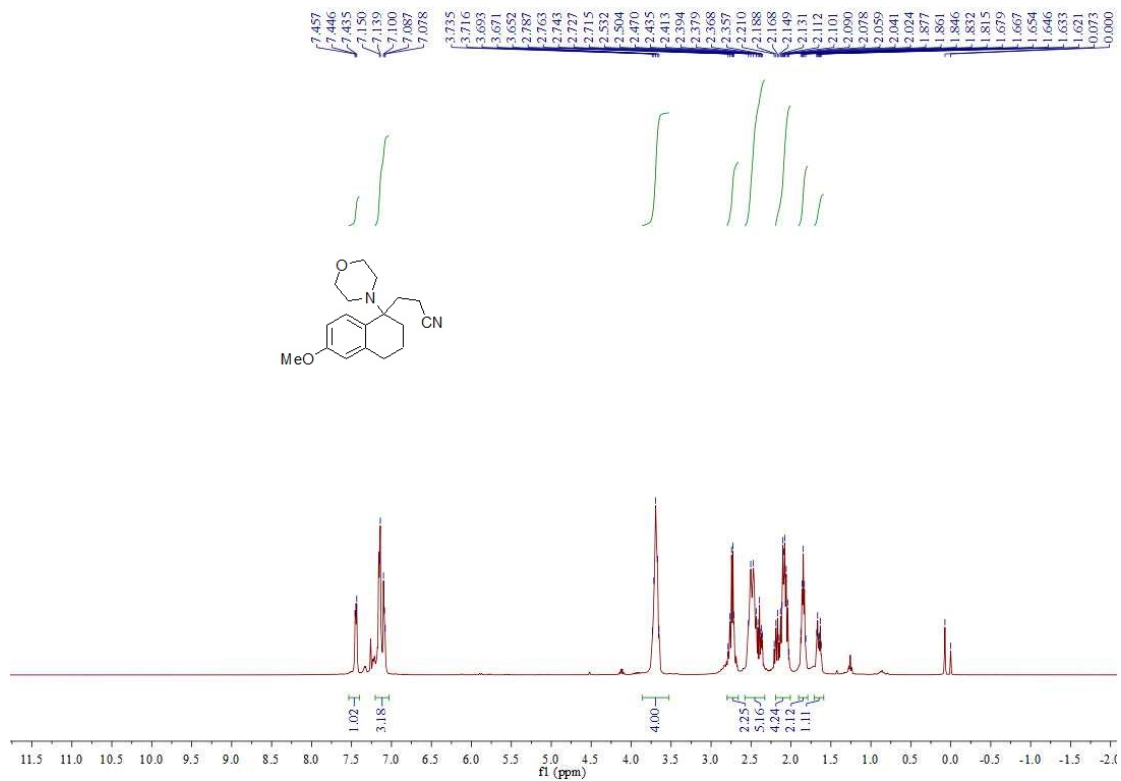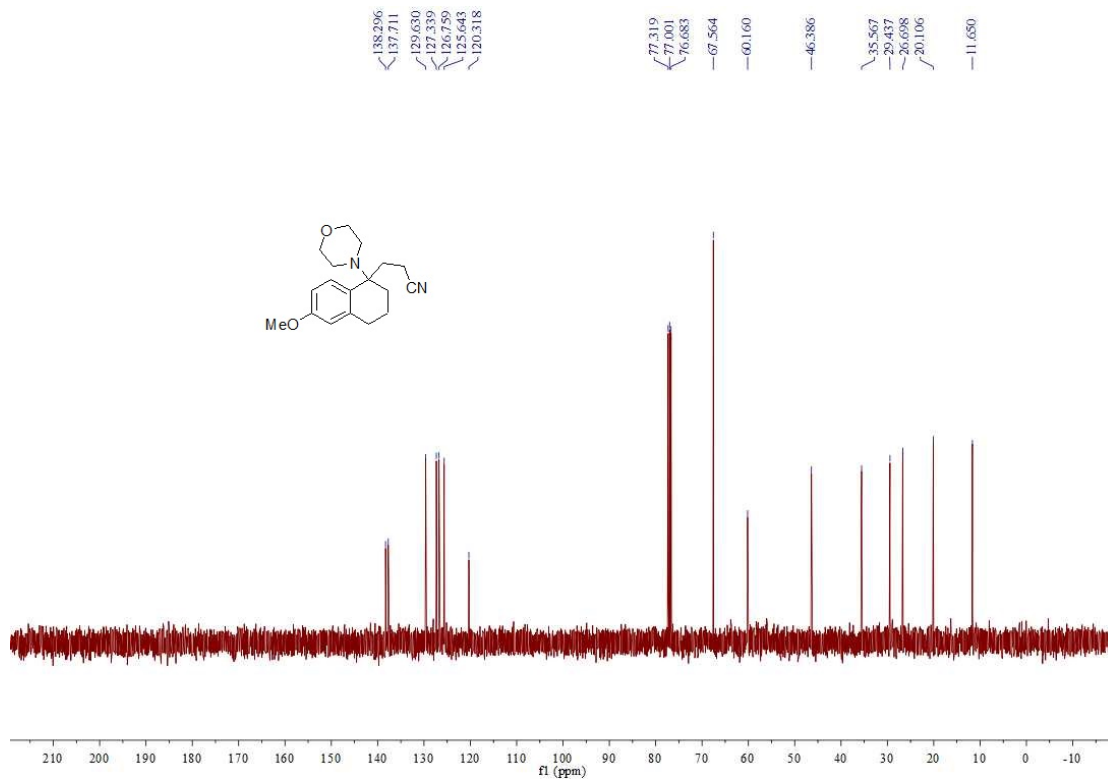

Supplementary Figure 29.  $^1\text{H}$ ,  $^{13}\text{C}$ -NMR spectra of product **35**

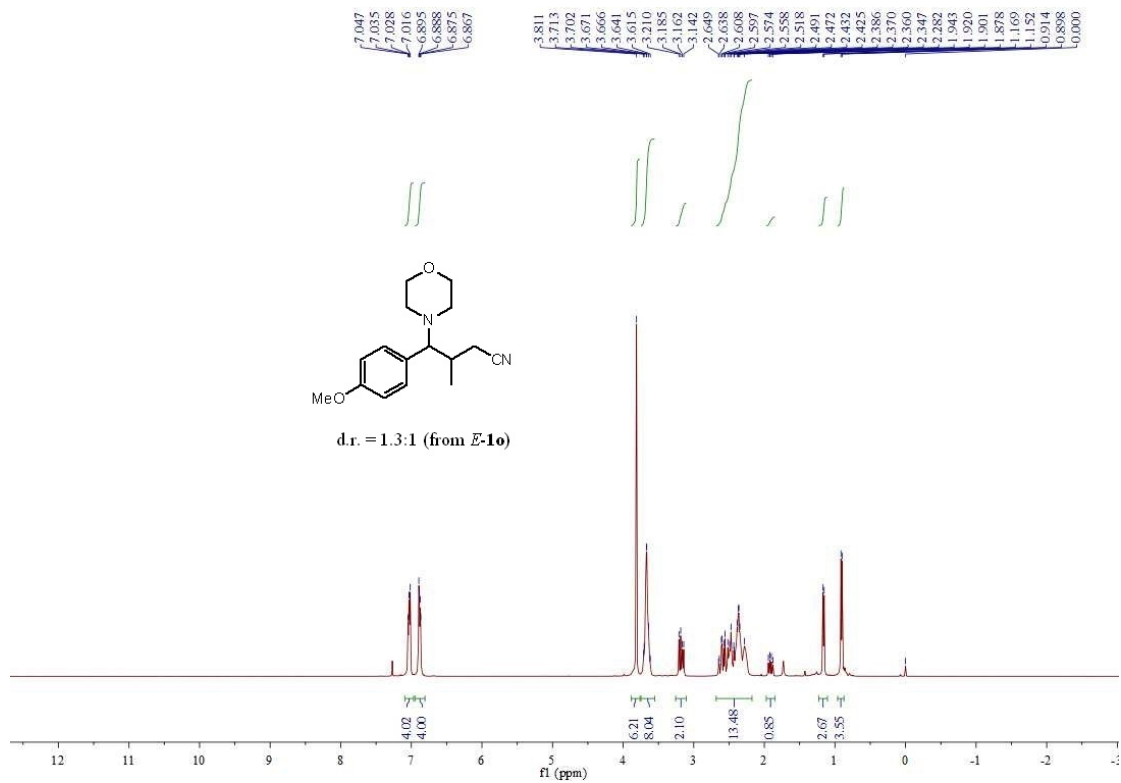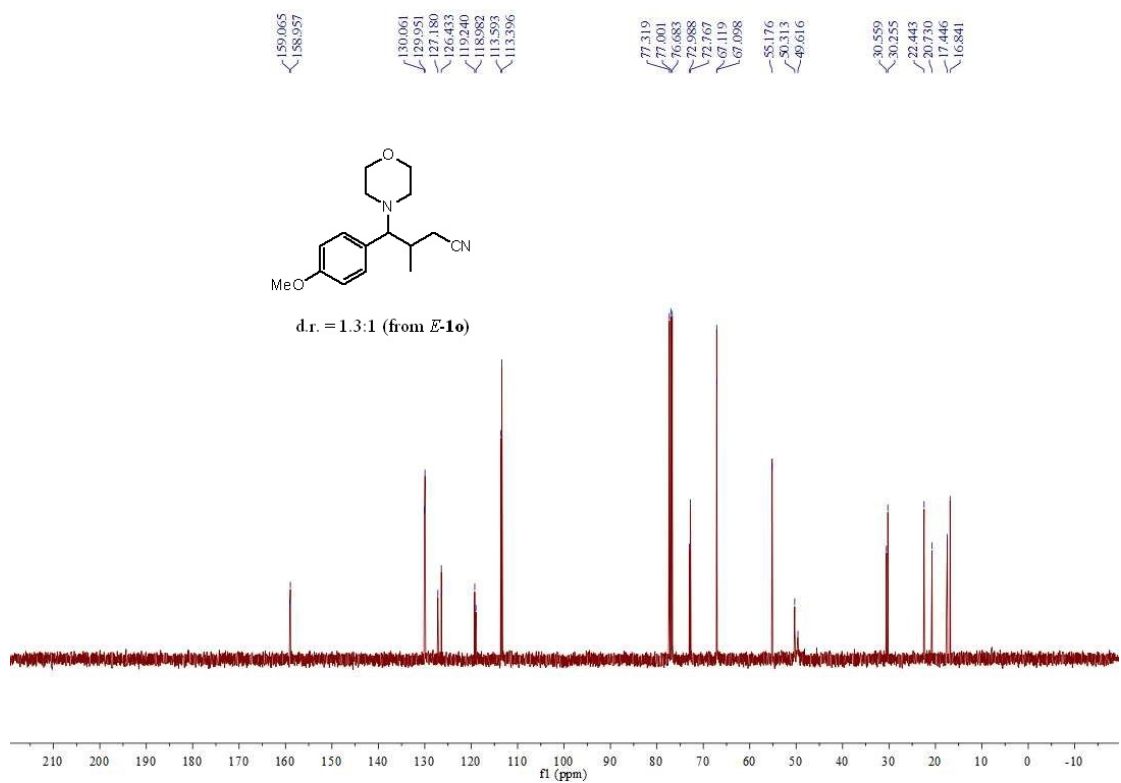

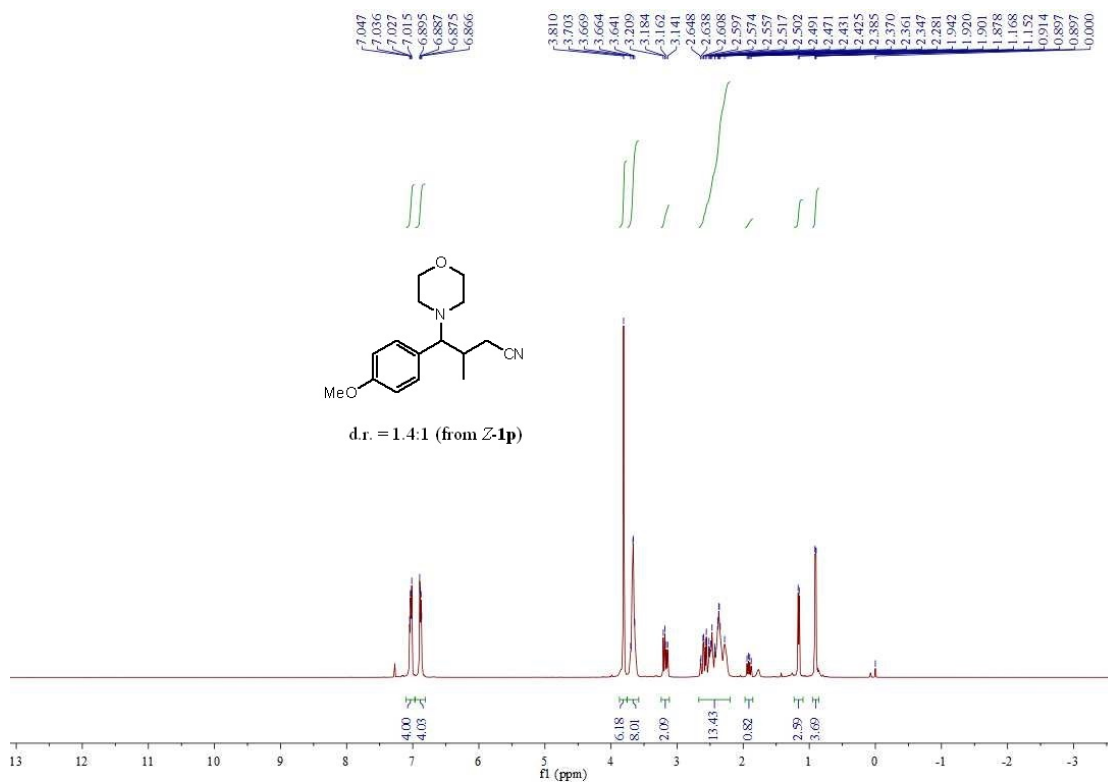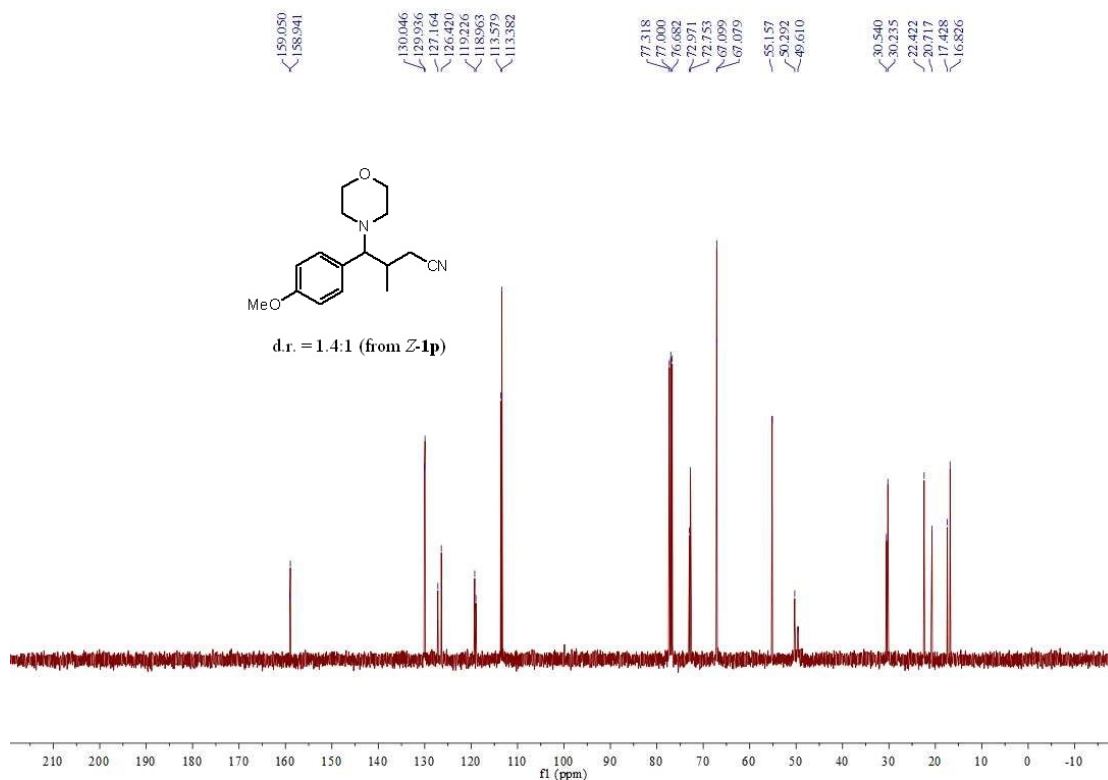





Supplementary Figure 31. <sup>1</sup>H, <sup>13</sup>C-NMR spectra of product 37

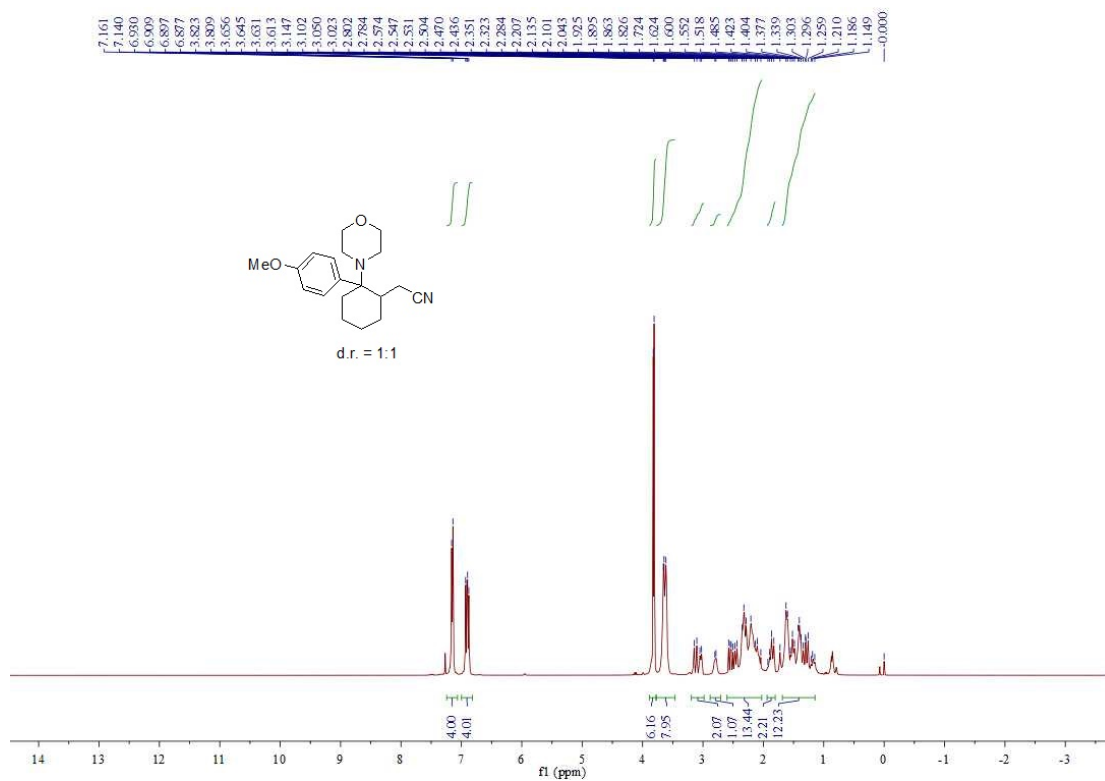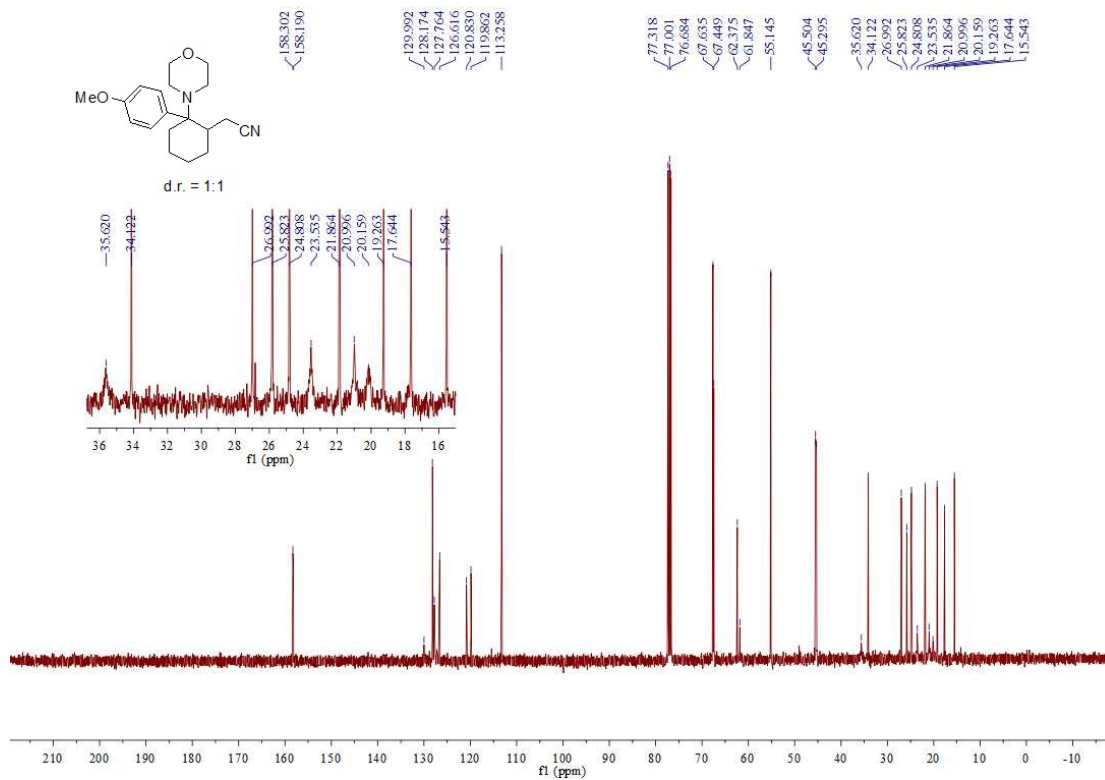

Supplementary Figure 32.  $^1\text{H}$ ,  $^{13}\text{C}$ -NMR spectra of product 38

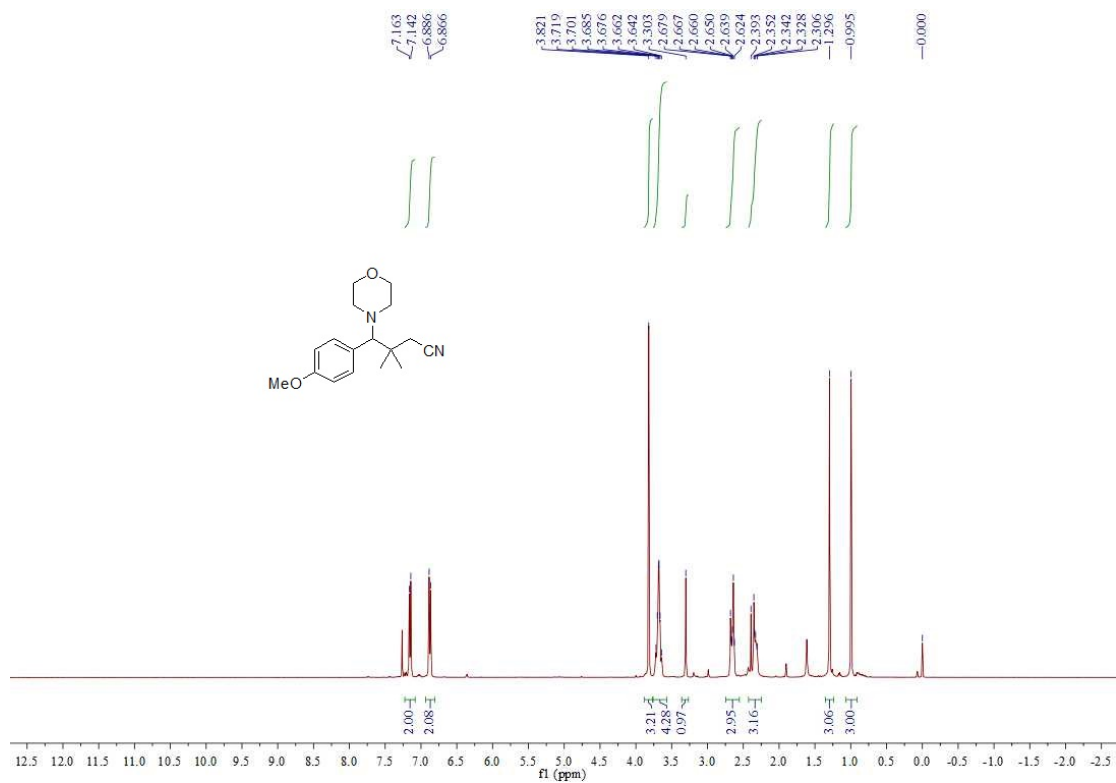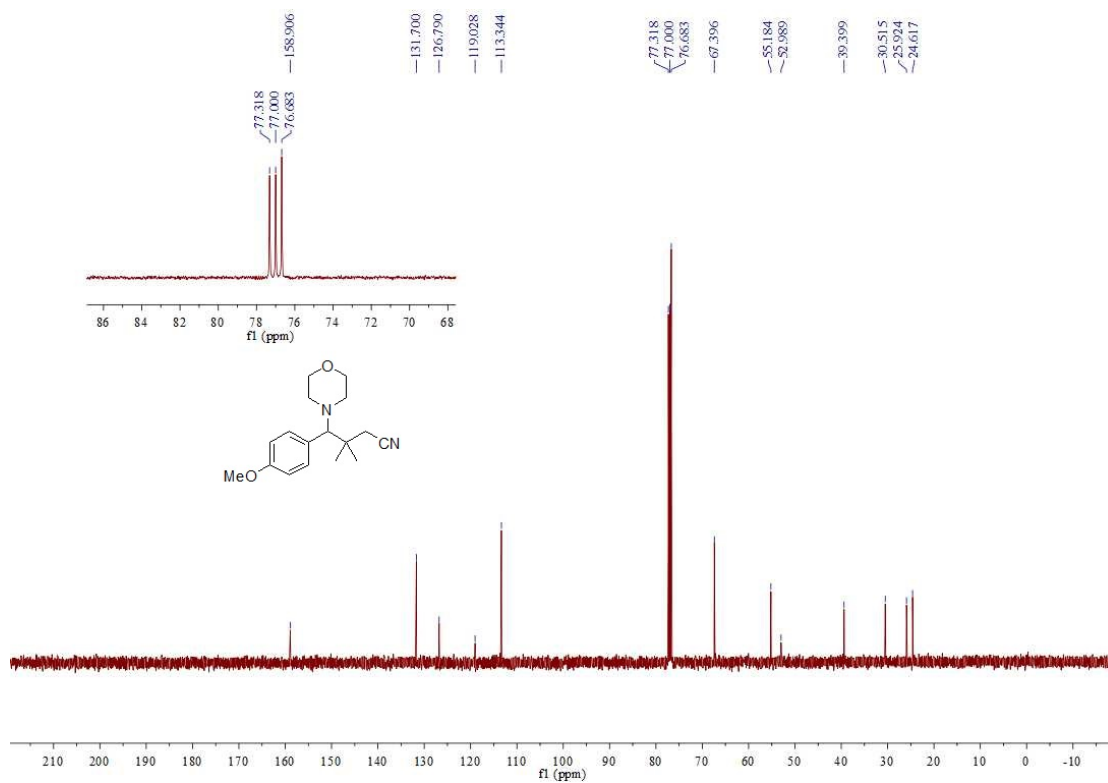

Supplementary Figure 33.  $^1\text{H}$ ,  $^{13}\text{C}$ -NMR spectra of product 39

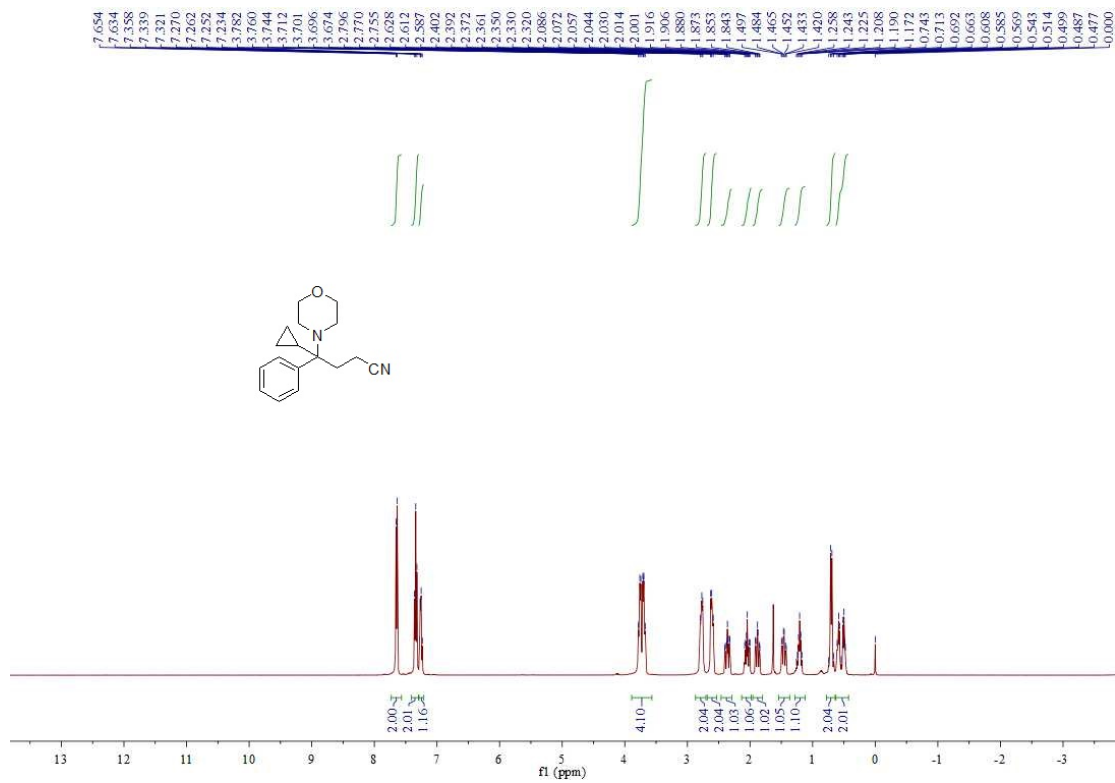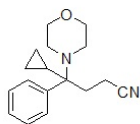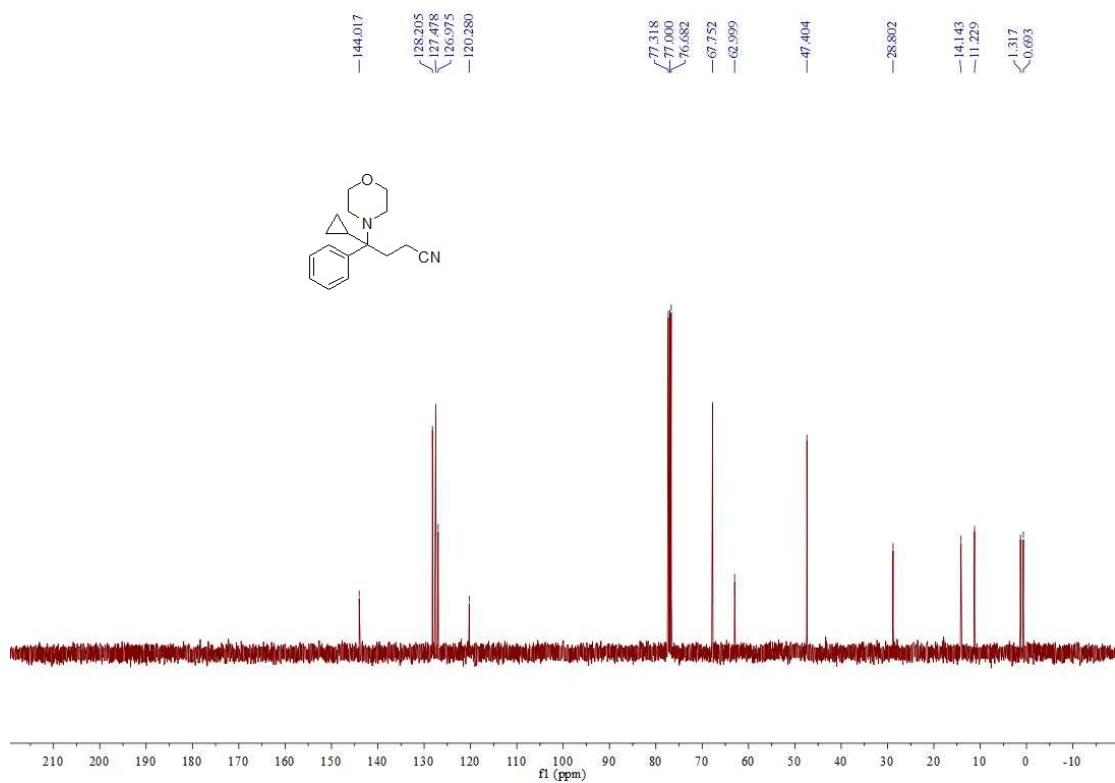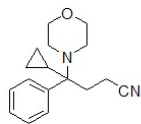

Supplementary Figure 34.  $^1\text{H}$ ,  $^{13}\text{C}$ -NMR spectra of product 40

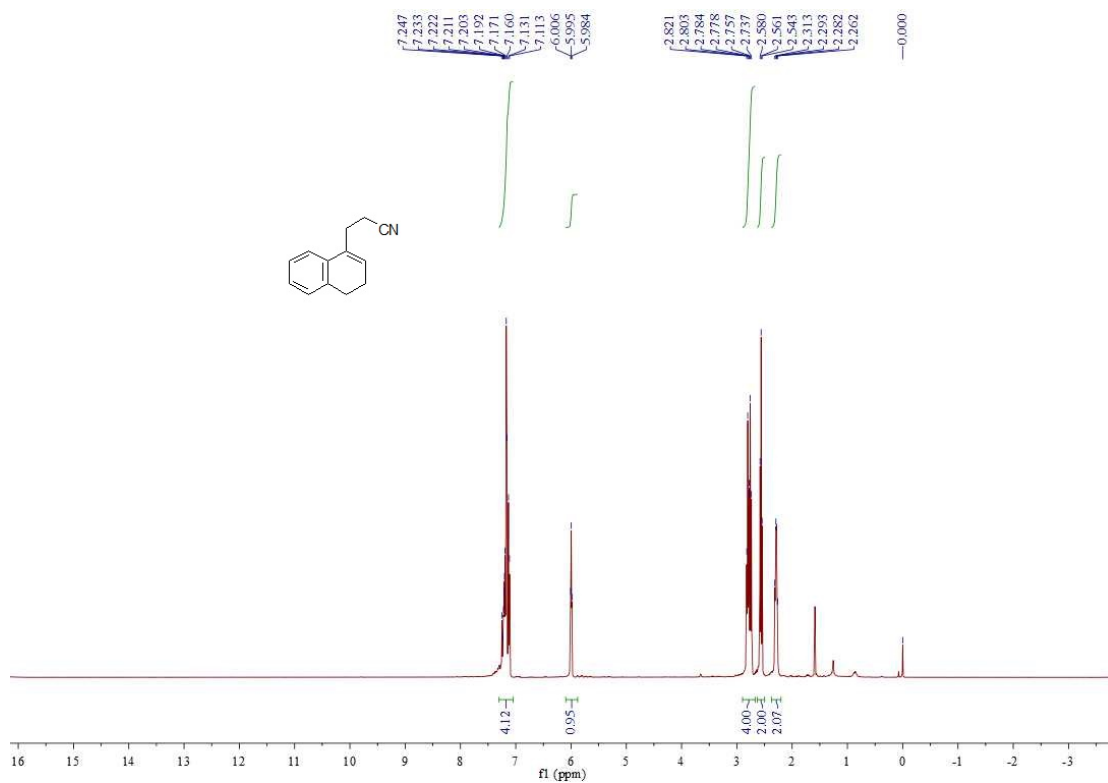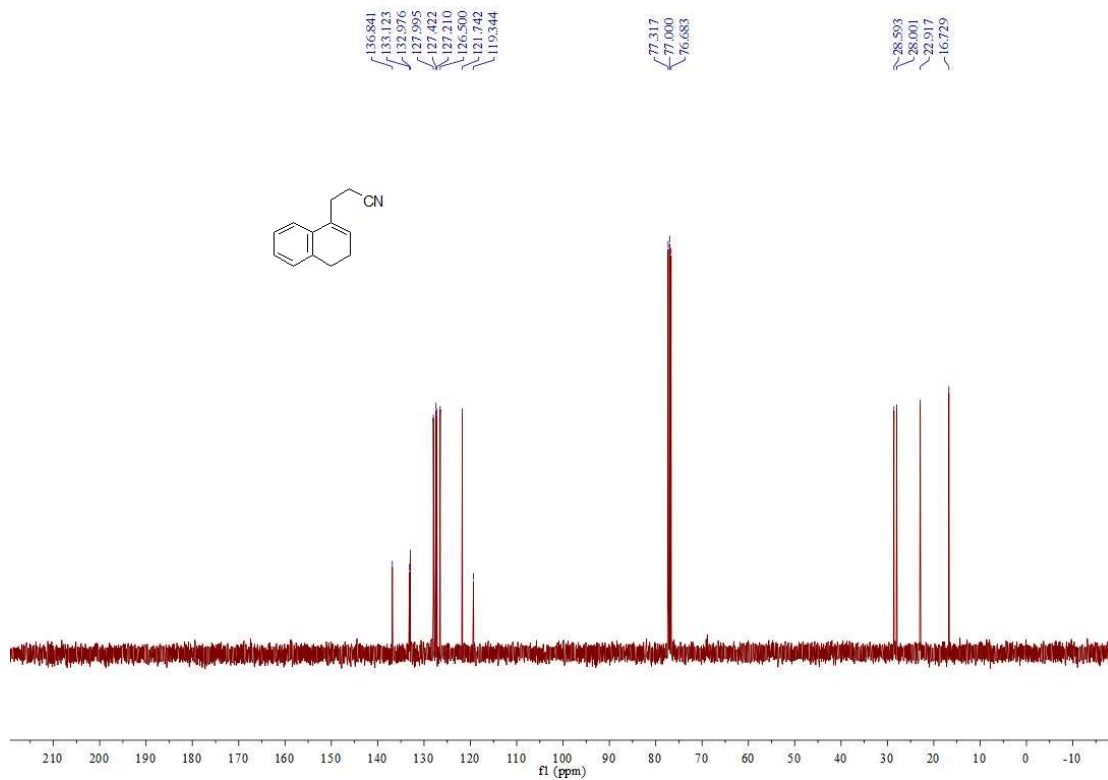

Supplementary Figure 35.  $^1\text{H}$ ,  $^{13}\text{C}$ -NMR spectra of product 41

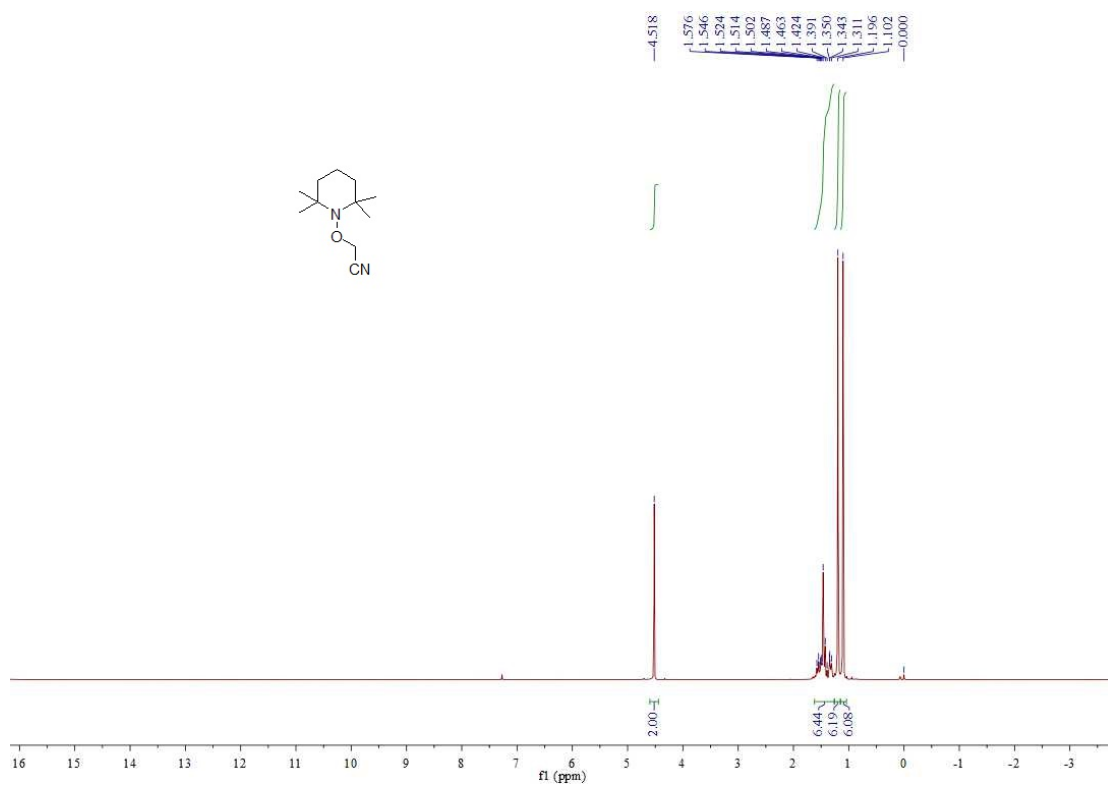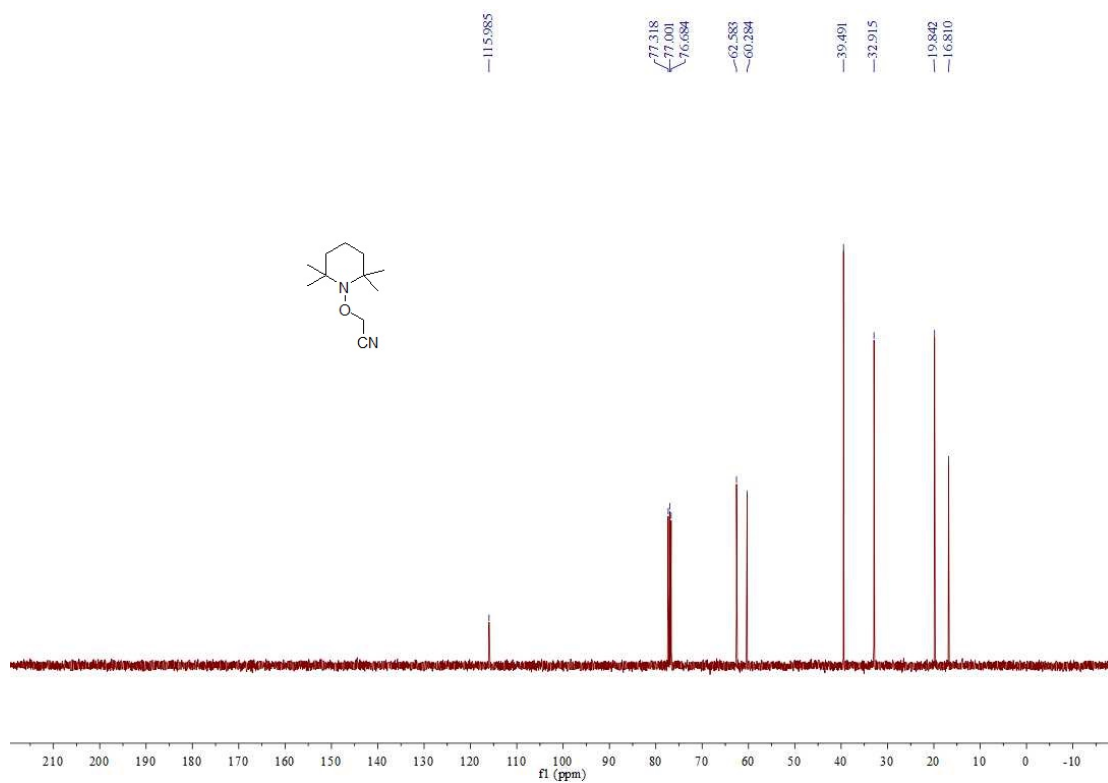

Supplementary Figure 36.  $^1\text{H}$ ,  $^{13}\text{C}$ -NMR spectra of product 42

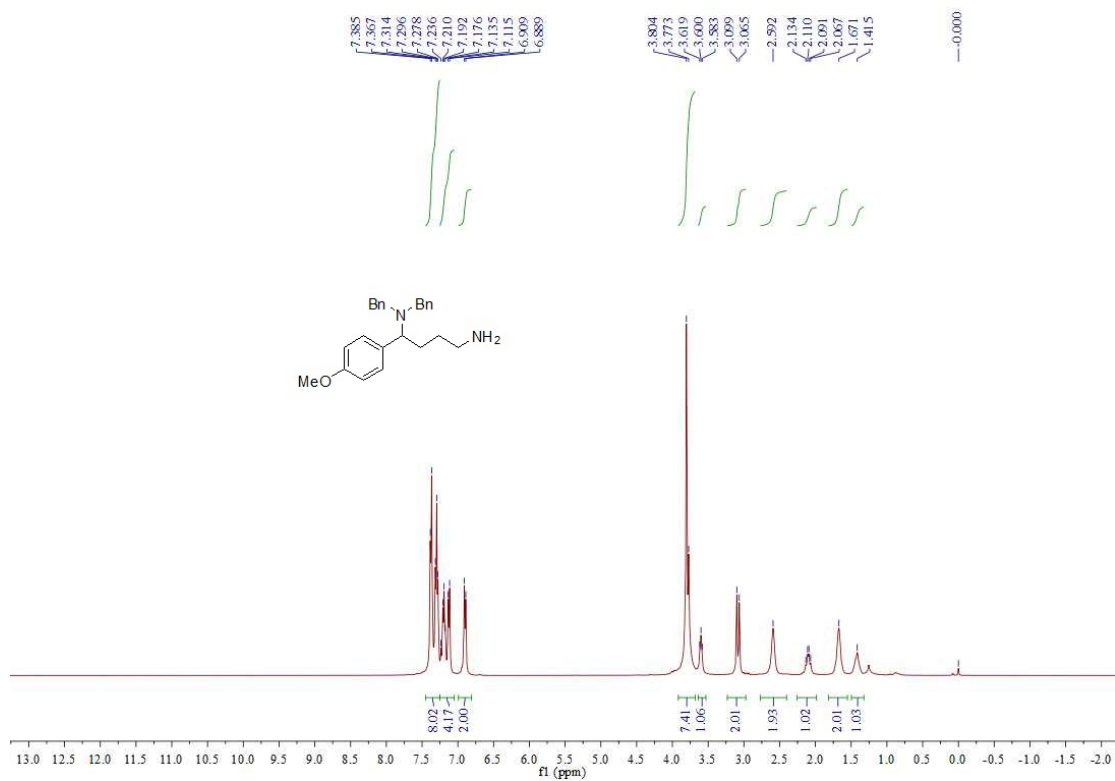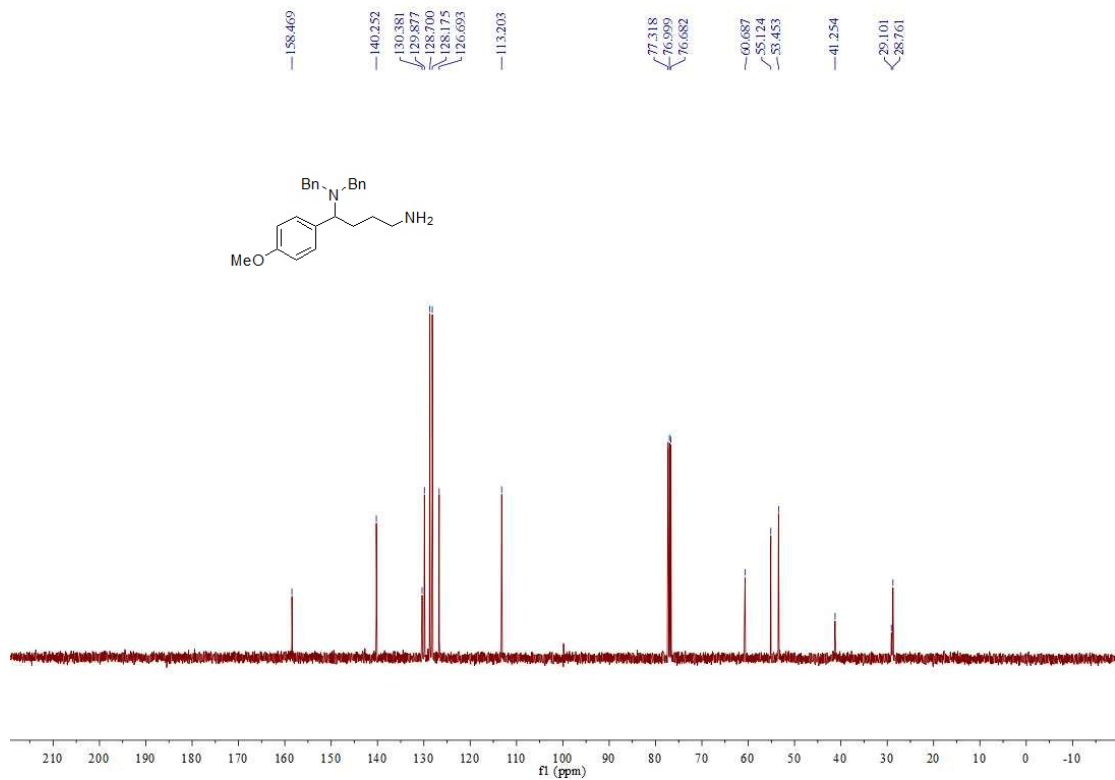

Supplementary Figure 37.  $^1\text{H}$ ,  $^{13}\text{C}$ -NMR spectra of product 43

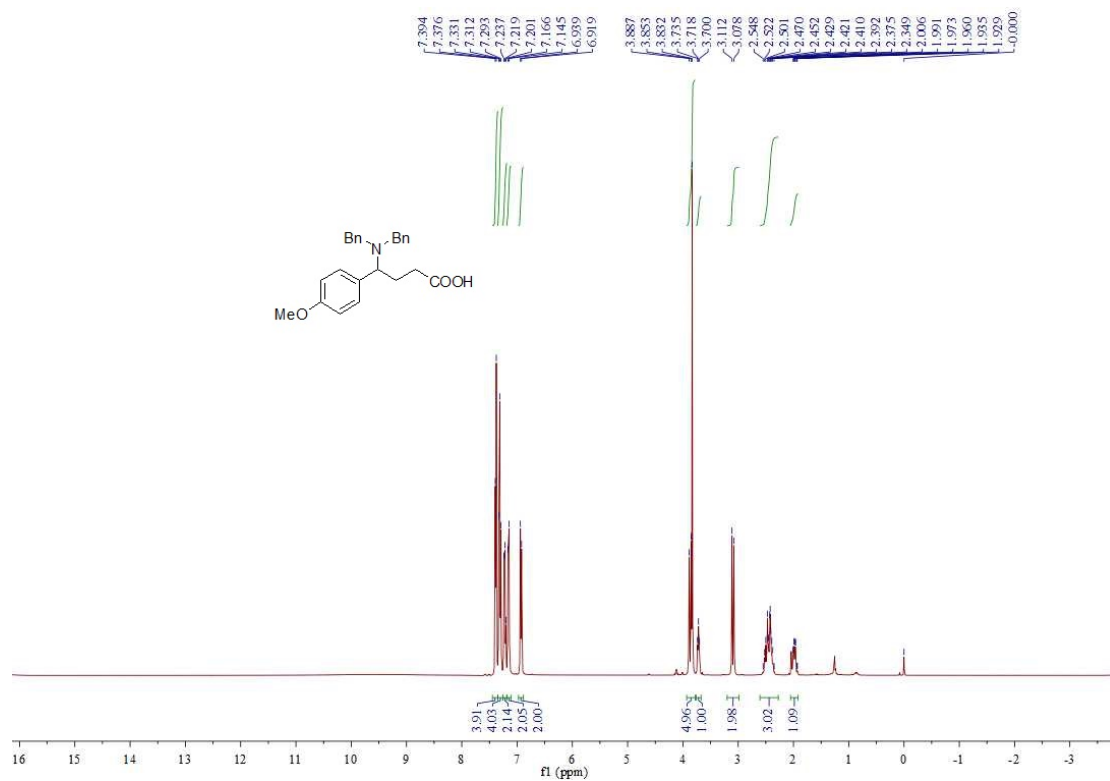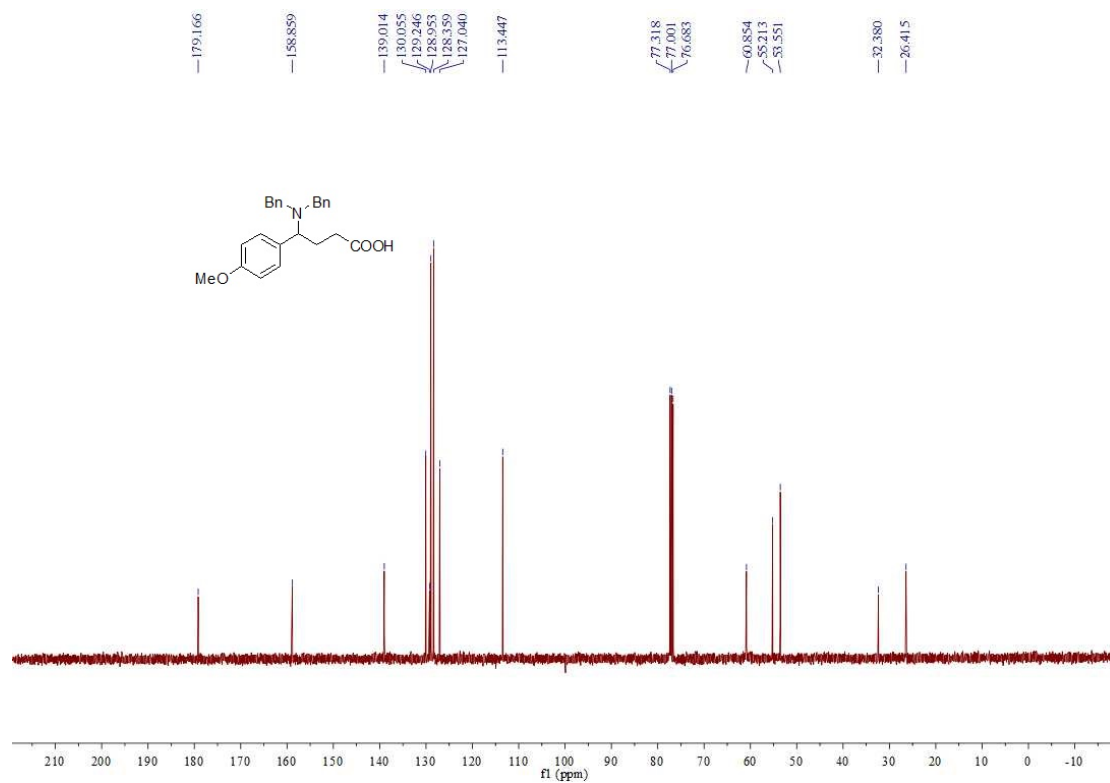



Supplementary Figure 38.  $^1\text{H}$ ,  $^{13}\text{C}$ -NMR spectra of product 44

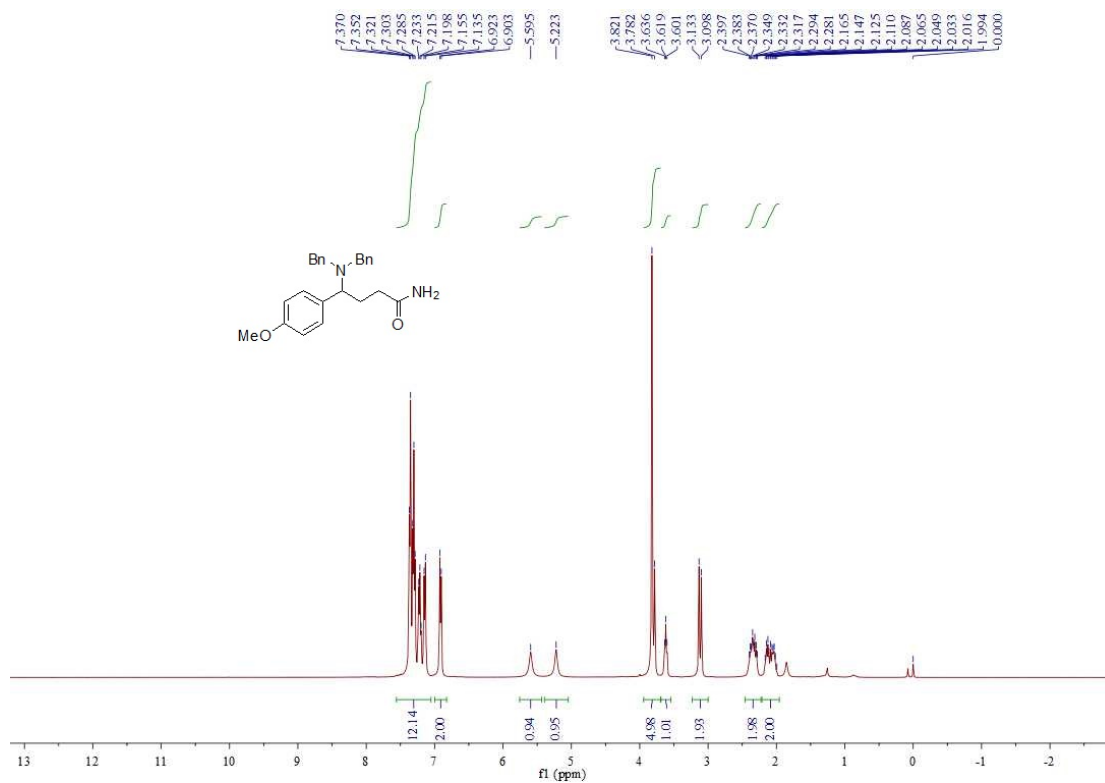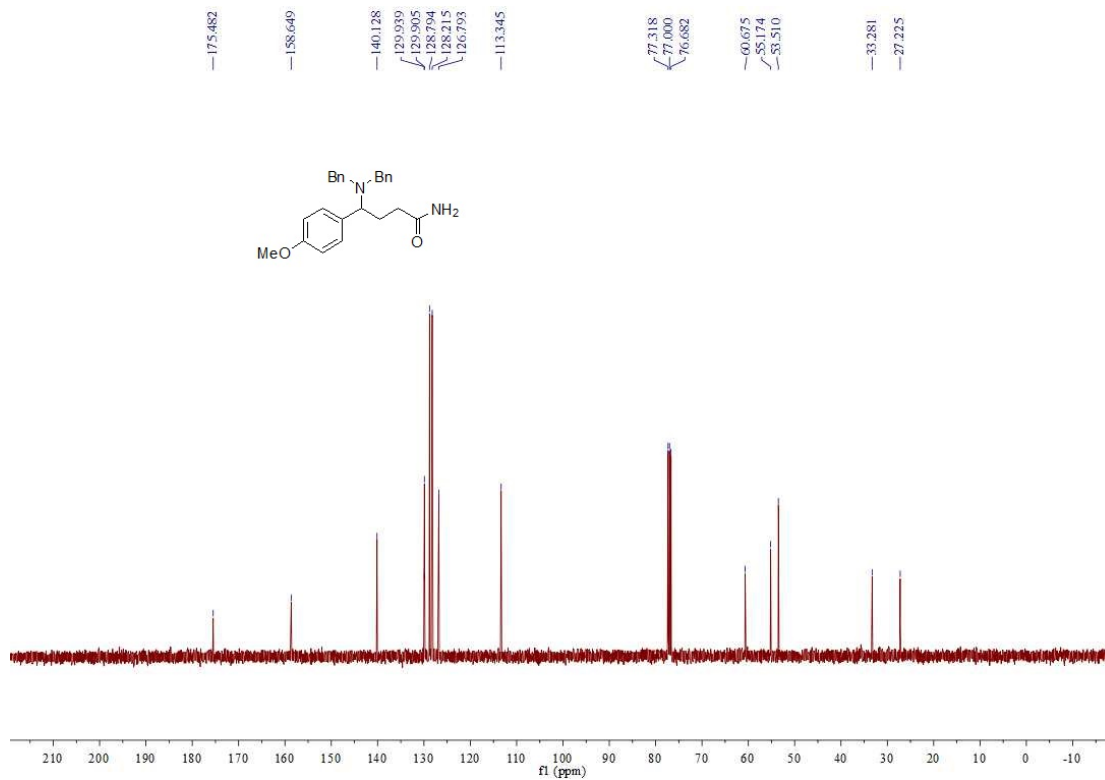

**Kinetic Isotopic Effect (KIE) Study:** To a Schlenk tube were added Fe(OTf)<sub>3</sub> (10 mol%), Ag<sub>2</sub>CO<sub>3</sub> (0.6 mmol), **1a** (0.3 mmol), **2a** (1 mL), **2a-3D** (1 mL) and **3a** (0.6 mmol). Then the tube was recharged with argon, and the mixture was stirred at 120 °C for 2 hours. After cooling to room temperature, the mixture was filtered through a small plug of silica gel to remove the precipitate and washed with EtOAc (3×10 mL). The mixture was concentrated and subjected to column chromatography to give the product. The products were under <sup>1</sup>H-NMR analysis. The result was summarized in the equation below.

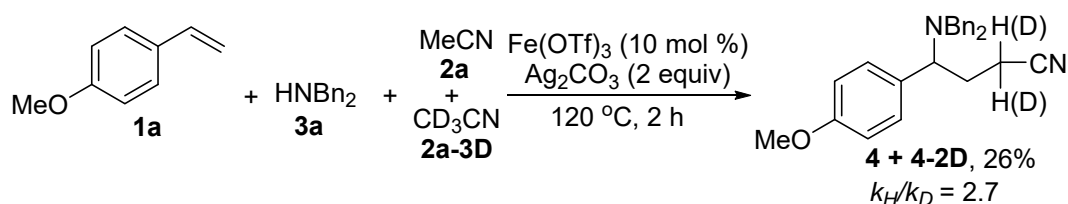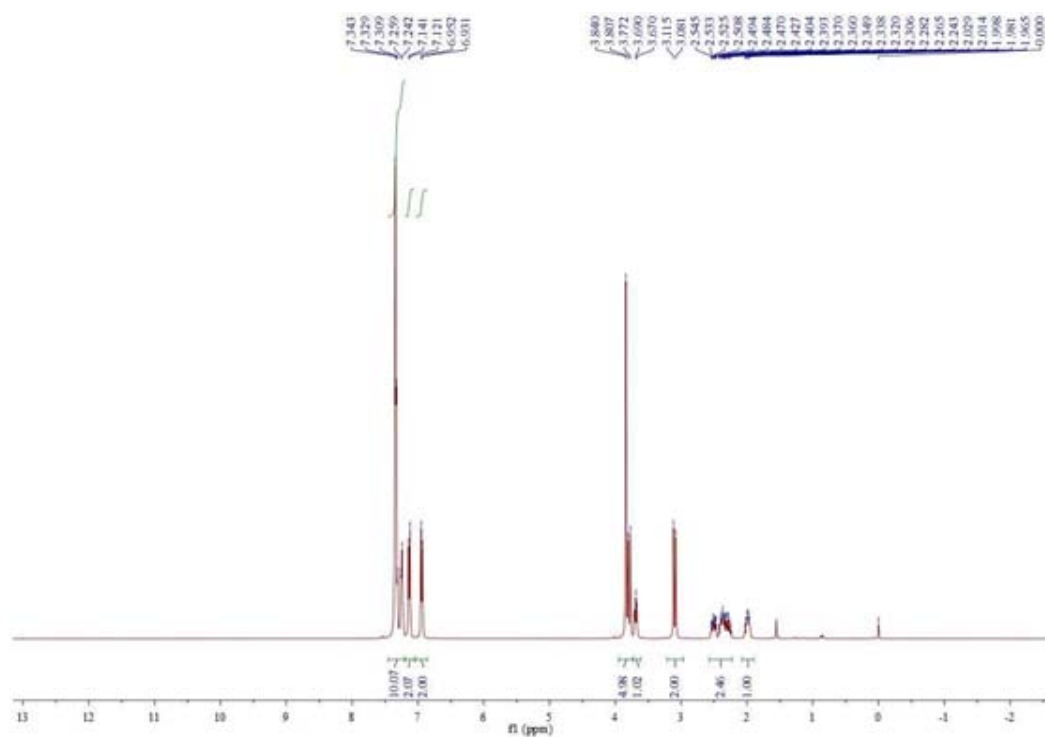

**Supplementary Figure 39.** <sup>1</sup>H-NMR spectrum for the reaction of **2a** and **2a-3D**

**Supplementary Figure 40. The X-ray single-crystal diffraction analysis of 4**

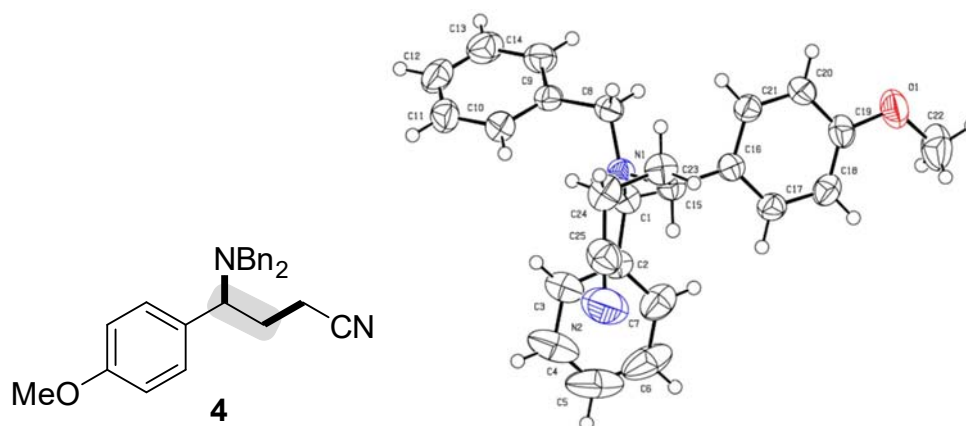

**Supplementary Table 1.** Crystal data and structure refinement for **4**.

|                                 |                                                                                                                        |
|---------------------------------|------------------------------------------------------------------------------------------------------------------------|
| Identification code             | <b>4</b>                                                                                                               |
| Empirical formula               | C <sub>25</sub> H <sub>26</sub> N <sub>2</sub> O                                                                       |
| Formula weight                  | 370.48                                                                                                                 |
| Temperature                     | 296(2) K                                                                                                               |
| Wavelength                      | 0.71073 Å                                                                                                              |
| Crystal system, space group     | Monoclinic, P2(1)/n                                                                                                    |
| Unit cell dimensions            | a = 8.0485(8) Å    alpha = 90 deg.<br>b = 10.3008(11) Å    beta = 90.873(2) deg.<br>c = 24.936(2) Å    gamma = 90 deg. |
| Volume                          | 2067.1(4) Å <sup>3</sup>                                                                                               |
| Z, Calculated density           | 4, 1.190 Mg/m <sup>3</sup>                                                                                             |
| Absorption coefficient          | 0.073 mm <sup>-1</sup>                                                                                                 |
| F(000)                          | 792                                                                                                                    |
| Crystal size                    | 0.23 x 0.20 x 0.20 mm <sup>3</sup>                                                                                     |
| Theta range for data collection | 1.63 to 27.42 deg.                                                                                                     |
| Limiting indices                | -10 ≤ h ≤ 10, -13 ≤ k ≤ 13, -32 ≤ l ≤ 24                                                                               |
| Reflections collected / unique  | 12245/4672 [R(int) = 0.0321]                                                                                           |
| Completeness to theta = 27.42   | 99.0 %                                                                                                                 |
| Absorption correction           | Semi-empirical from equivalents                                                                                        |

|                                   |                                             |
|-----------------------------------|---------------------------------------------|
| Max. and min. transmission        | 0.9856 and 0.9835                           |
| Refinement method                 | Full-matrix least-squares on F <sup>2</sup> |
| Data/restraints/parameters        | 4672/0/254                                  |
| Goodness-of-fit on F <sup>2</sup> | 1.028                                       |
| Final R indices [I>2σ(I)]         | R1 = 0.0511, wR2 = 0.1153                   |
| R indices (all data)              | R1 = 0.0902, wR2 = 0.1345                   |
| Largest diff. peak and hole       | 0.147 and -0.181 e.Å <sup>-3</sup>          |

**Supplementary Table 2.** Atomic coordinates ( × 10<sup>4</sup>) and equivalent isotropic

displacement parameters (Å<sup>2</sup> × 10<sup>3</sup>) for ljh041\_0m.

U(eq) is defined as one third of the trace of the orthogonalized

U<sub>ij</sub> tensor.

| x    | y        | z       | U(eq)   |        |
|------|----------|---------|---------|--------|
| O(1) | 12385(2) | 2177(1) | 51(1)   | 71(1)  |
| N(1) | 6143(2)  | 4398(1) | 1375(1) | 38(1)  |
| C(1) | 5213(2)  | 3410(2) | 1075(1) | 43(1)  |
| N(2) | 6696(3)  | 3317(2) | 3079(1) | 108(1) |
| C(2) | 4474(2)  | 2377(2) | 1419(1) | 44(1)  |
| C(3) | 3360(3)  | 2702(2) | 1811(1) | 63(1)  |
| C(4) | 2576(3)  | 1763(3) | 2104(1) | 92(1)  |
| C(5) | 2897(4)  | 475(3)  | 2010(1) | 108(1) |

|       |          |         |         |        |
|-------|----------|---------|---------|--------|
| C(6)  | 4012(4)  | 134(2)  | 1628(1) | 100(1) |
| C(7)  | 4799(3)  | 1080(2) | 1332(1) | 67(1)  |
| C(8)  | 6287(2)  | 5591(2) | 1056(1) | 46(1)  |
| C(9)  | 4622(2)  | 6256(2) | 986(1)  | 43(1)  |
| C(10) | 3593(2)  | 6460(2) | 1416(1) | 51(1)  |
| C(11) | 2086(2)  | 7088(2) | 1353(1) | 59(1)  |
| C(12) | 1583(2)  | 7513(2) | 852(1)  | 65(1)  |
| C(13) | 2585(3)  | 7310(2) | 422(1)  | 67(1)  |
| C(14) | 4094(2)  | 6689(2) | 487(1)  | 56(1)  |
| C(15) | 7727(2)  | 3868(2) | 1592(1) | 41(1)  |
| C(16) | 8961(2)  | 3394(2) | 1180(1) | 40(1)  |
| C(17) | 9287(2)  | 2090(2) | 1119(1) | 45(1)  |
| C(18) | 10420(2) | 1631(2) | 751(1)  | 49(1)  |
| C(19) | 11244(2) | 2499(2) | 429(1)  | 48(1)  |
| C(20) | 10944(2) | 3808(2) | 484(1)  | 49(1)  |
| C(21) | 9831(2)  | 4250(2) | 854(1)  | 45(1)  |
| C(22) | 12718(3) | 855(2)  | -41(1)  | 86(1)  |
| C(23) | 8548(2)  | 4792(2) | 1992(1) | 52(1)  |
| C(24) | 7444(3)  | 5209(2) | 2450(1) | 59(1)  |
| C(25) | 7001(3)  | 4151(2) | 2804(1) | 67(1)  |

**Supplementary Table 3.** Bond lengths [Å] and angles [deg] for ljh041\_0m.

---

|            |            |
|------------|------------|
| O(1)-C(19) | 1.367(2)   |
| O(1)-C(22) | 1.408(2)   |
| N(1)-C(1)  | 1.4630(19) |
| N(1)-C(8)  | 1.469(2)   |
| N(1)-C(15) | 1.4816(19) |
| C(1)-C(2)  | 1.496(2)   |
| C(1)-H(1A) | 0.9700     |
| C(1)-H(1B) | 0.9700     |
| N(2)-C(25) | 1.129(3)   |
| C(2)-C(3)  | 1.378(2)   |
| C(2)-C(7)  | 1.379(2)   |
| C(3)-C(4)  | 1.372(3)   |
| C(3)-H(3)  | 0.9300     |
| C(4)-C(5)  | 1.372(4)   |
| C(4)-H(4)  | 0.9300     |
| C(5)-C(6)  | 1.366(4)   |
| C(5)-H(5)  | 0.9300     |
| C(6)-C(7)  | 1.382(3)   |

|             |          |
|-------------|----------|
| C(6)-H(6)   | 0.9300   |
| C(7)-H(7)   | 0.9300   |
| C(8)-C(9)   | 1.512(2) |
| C(8)-H(8A)  | 0.9700   |
| C(8)-H(8B)  | 0.9700   |
| C(9)-C(10)  | 1.380(2) |
| C(9)-C(14)  | 1.383(2) |
| C(10)-C(11) | 1.381(2) |
| C(10)-H(10) | 0.9300   |
| C(11)-C(12) | 1.379(3) |
| C(11)-H(11) | 0.9300   |
| C(12)-C(13) | 1.367(3) |
| C(12)-H(12) | 0.9300   |
| C(13)-C(14) | 1.380(3) |
| C(13)-H(13) | 0.9300   |
| C(14)-H(14) | 0.9300   |
| C(15)-C(16) | 1.521(2) |
| C(15)-C(23) | 1.523(2) |
| C(15)-H(15) | 0.9800   |
| C(16)-C(17) | 1.377(2) |
| C(16)-C(21) | 1.395(2) |
| C(17)-C(18) | 1.386(2) |

|                  |            |
|------------------|------------|
| C(17)-H(17)      | 0.9300     |
| C(18)-C(19)      | 1.378(2)   |
| C(18)-H(18)      | 0.9300     |
| C(19)-C(20)      | 1.377(2)   |
| C(20)-C(21)      | 1.373(2)   |
| C(20)-H(20)      | 0.9300     |
| C(21)-H(21)      | 0.9300     |
| C(22)-H(22A)     | 0.9600     |
| C(22)-H(22B)     | 0.9600     |
| C(22)-H(22C)     | 0.9600     |
| C(23)-C(24)      | 1.520(2)   |
| C(23)-H(23A)     | 0.9700     |
| C(23)-H(23B)     | 0.9700     |
| C(24)-C(25)      | 1.450(3)   |
| C(24)-H(24A)     | 0.9700     |
| C(24)-H(24B)     | 0.9700     |
| C(19)-O(1)-C(22) | 118.61(16) |
| C(1)-N(1)-C(8)   | 110.40(12) |
| C(1)-N(1)-C(15)  | 111.14(12) |
| C(8)-N(1)-C(15)  | 115.55(12) |
| N(1)-C(1)-C(2)   | 113.95(12) |



|                  |            |
|------------------|------------|
| N(1)-C(1)-H(1A)  | 108.8      |
| C(2)-C(1)-H(1A)  | 108.8      |
| N(1)-C(1)-H(1B)  | 108.8      |
| C(2)-C(1)-H(1B)  | 108.8      |
| H(1A)-C(1)-H(1B) | 107.7      |
| C(3)-C(2)-C(7)   | 118.25(18) |
| C(3)-C(2)-C(1)   | 120.18(16) |
| C(7)-C(2)-C(1)   | 121.45(17) |
| C(4)-C(3)-C(2)   | 121.0(2)   |
| C(4)-C(3)-H(3)   | 119.5      |
| C(2)-C(3)-H(3)   | 119.5      |
| C(3)-C(4)-C(5)   | 120.2(3)   |
| C(3)-C(4)-H(4)   | 119.9      |
| C(5)-C(4)-H(4)   | 119.9      |
| C(6)-C(5)-C(4)   | 119.7(2)   |
| C(6)-C(5)-H(5)   | 120.2      |
| C(4)-C(5)-H(5)   | 120.2      |
| C(5)-C(6)-C(7)   | 120.1(3)   |
| C(5)-C(6)-H(6)   | 119.9      |
| C(7)-C(6)-H(6)   | 119.9      |
| C(2)-C(7)-C(6)   | 120.7(2)   |
| C(2)-C(7)-H(7)   | 119.6      |

|                   |            |
|-------------------|------------|
| C(6)-C(7)-H(7)    | 119.6      |
| N(1)-C(8)-C(9)    | 111.36(13) |
| N(1)-C(8)-H(8A)   | 109.4      |
| C(9)-C(8)-H(8A)   | 109.4      |
| N(1)-C(8)-H(8B)   | 109.4      |
| C(9)-C(8)-H(8B)   | 109.4      |
| H(8A)-C(8)-H(8B)  | 108.0      |
| C(10)-C(9)-C(14)  | 118.00(16) |
| C(10)-C(9)-C(8)   | 121.37(15) |
| C(14)-C(9)-C(8)   | 120.63(16) |
| C(9)-C(10)-C(11)  | 121.30(18) |
| C(9)-C(10)-H(10)  | 119.4      |
| C(11)-C(10)-H(10) | 119.4      |
| C(12)-C(11)-C(10) | 119.80(19) |
| C(12)-C(11)-H(11) | 120.1      |
| C(10)-C(11)-H(11) | 120.1      |
| C(13)-C(12)-C(11) | 119.54(18) |
| C(13)-C(12)-H(12) | 120.2      |
| C(11)-C(12)-H(12) | 120.2      |
| C(12)-C(13)-C(14) | 120.49(19) |
| C(12)-C(13)-H(13) | 119.8      |
| C(14)-C(13)-H(13) | 119.8      |

|                   |            |
|-------------------|------------|
| C(13)-C(14)-C(9)  | 120.88(19) |
| C(13)-C(14)-H(14) | 119.6      |
| C(9)-C(14)-H(14)  | 119.6      |
| N(1)-C(15)-C(16)  | 116.07(12) |
| N(1)-C(15)-C(23)  | 111.76(13) |
| C(16)-C(15)-C(23) | 111.26(13) |
| N(1)-C(15)-H(15)  | 105.6      |
| C(16)-C(15)-H(15) | 105.6      |
| C(23)-C(15)-H(15) | 105.6      |
| C(17)-C(16)-C(21) | 117.07(15) |
| C(17)-C(16)-C(15) | 120.98(14) |
| C(21)-C(16)-C(15) | 121.95(14) |
| C(16)-C(17)-C(18) | 122.23(16) |
| C(16)-C(17)-H(17) | 118.9      |
| C(18)-C(17)-H(17) | 118.9      |
| C(19)-C(18)-C(17) | 119.43(16) |
| C(19)-C(18)-H(18) | 120.3      |
| C(17)-C(18)-H(18) | 120.3      |
| O(1)-C(19)-C(20)  | 115.17(16) |
| O(1)-C(19)-C(18)  | 125.38(16) |
| C(20)-C(19)-C(18) | 119.45(16) |
| C(21)-C(20)-C(19) | 120.49(16) |

|                     |            |
|---------------------|------------|
| C(21)-C(20)-H(20)   | 119.8      |
| C(19)-C(20)-H(20)   | 119.8      |
| C(20)-C(21)-C(16)   | 121.32(15) |
| C(20)-C(21)-H(21)   | 119.3      |
| C(16)-C(21)-H(21)   | 119.3      |
| O(1)-C(22)-H(22A)   | 109.5      |
| O(1)-C(22)-H(22B)   | 109.5      |
| H(22A)-C(22)-H(22B) | 109.5      |
| O(1)-C(22)-H(22C)   | 109.5      |
| H(22A)-C(22)-H(22C) | 109.5      |
| H(22B)-C(22)-H(22C) | 109.5      |
| C(24)-C(23)-C(15)   | 114.62(15) |
| C(24)-C(23)-H(23A)  | 108.6      |
| C(15)-C(23)-H(23A)  | 108.6      |
| C(24)-C(23)-H(23B)  | 108.6      |
| C(15)-C(23)-H(23B)  | 108.6      |
| H(23A)-C(23)-H(23B) | 107.6      |
| C(25)-C(24)-C(23)   | 113.36(16) |
| C(25)-C(24)-H(24A)  | 108.9      |
| C(23)-C(24)-H(24A)  | 108.9      |
| C(25)-C(24)-H(24B)  | 108.9      |
| C(23)-C(24)-H(24B)  | 108.9      |

|                     |          |
|---------------------|----------|
| H(24A)-C(24)-H(24B) | 107.7    |
| N(2)-C(25)-C(24)    | 178.3(3) |

---

Symmetry transformations used to generate equivalent atoms:

**Supplementary Table 4.** Anisotropic displacement parameters ( $\text{Å}^2 \times 10^3$ ) for ljh041\_0m.

The anisotropic displacement factor exponent takes the form:

$$-2 \pi^2 [ h^2 a^{*2} U_{11} + \dots + 2 h k a^* b^* U_{12} ]$$

---

|      | U11    | U22    | U33    | U23    | U13    | U12    |
|------|--------|--------|--------|--------|--------|--------|
| O(1) | 59(1)  | 70(1)  | 85(1)  | -14(1) | 26(1)  | 5(1)   |
| N(1) | 37(1)  | 38(1)  | 40(1)  | 2(1)   | 0(1)   | -2(1)  |
| C(1) | 42(1)  | 47(1)  | 40(1)  | -3(1)  | -2(1)  | -2(1)  |
| N(2) | 125(2) | 98(2)  | 103(2) | 13(1)  | 34(2)  | -20(2) |
| C(2) | 43(1)  | 45(1)  | 45(1)  | 2(1)   | -11(1) | -8(1)  |
| C(3) | 71(1)  | 66(1)  | 52(1)  | 2(1)   | 6(1)   | -19(1) |
| C(4) | 94(2)  | 120(2) | 61(1)  | 25(1)  | -1(1)  | -46(2) |
| C(5) | 97(2)  | 107(2) | 118(2) | 63(2)  | -44(2) | -54(2) |
| C(6) | 88(2)  | 49(1)  | 163(3) | 26(2)  | -55(2) | -22(1) |
| C(7) | 57(1)  | 47(1)  | 97(2)  | -5(1)  | -21(1) | -5(1)  |
| C(8) | 42(1)  | 47(1)  | 50(1)  | 8(1)   | 4(1)   | -2(1)  |

---

|       |       |       |        |        |        |       |
|-------|-------|-------|--------|--------|--------|-------|
| C(9)  | 41(1) | 37(1) | 50(1)  | 5(1)   | 2(1)   | -3(1) |
| C(10) | 51(1) | 48(1) | 55(1)  | 1(1)   | 3(1)   | 2(1)  |
| C(11) | 50(1) | 47(1) | 81(1)  | -10(1) | 10(1)  | 0(1)  |
| C(12) | 45(1) | 44(1) | 104(2) | 5(1)   | -10(1) | 3(1)  |
| C(13) | 61(1) | 62(1) | 76(1)  | 19(1)  | -13(1) | 1(1)  |
| C(14) | 54(1) | 58(1) | 56(1)  | 11(1)  | 1(1)   | -1(1) |
| C(15) | 40(1) | 40(1) | 42(1)  | 4(1)   | -2(1)  | -2(1) |
| C(16) | 34(1) | 42(1) | 43(1)  | 0(1)   | -3(1)  | -2(1) |
| C(17) | 40(1) | 40(1) | 54(1)  | 4(1)   | -1(1)  | -3(1) |
| C(18) | 43(1) | 40(1) | 64(1)  | -5(1)  | -6(1)  | 2(1)  |
| C(19) | 34(1) | 54(1) | 57(1)  | -6(1)  | 2(1)   | 2(1)  |
| C(20) | 38(1) | 49(1) | 61(1)  | 7(1)   | 7(1)   | -4(1) |
| C(21) | 38(1) | 38(1) | 58(1)  | 2(1)   | 0(1)   | -2(1) |
| C(22) | 70(2) | 80(2) | 109(2) | -38(1) | 17(1)  | 7(1)  |
| C(23) | 52(1) | 52(1) | 51(1)  | -2(1)  | -7(1)  | -6(1) |
| C(24) | 69(1) | 60(1) | 49(1)  | -9(1)  | -8(1)  | 6(1)  |
| C(25) | 69(1) | 70(1) | 62(1)  | -11(1) | 9(1)   | -7(1) |

---

**Supplementary Table 5.** Hydrogen coordinates ( $\times 10^4$ ) and isotropic

displacement parameters ( $\text{\AA}^2 \times 10^3$ ) for ljh041\_0m.

---

| x     | y    | z    | U(eq) |     |
|-------|------|------|-------|-----|
| H(1A) | 5950 | 3005 | 820   | 51  |
| H(1B) | 4327 | 3831 | 872   | 51  |
| H(3)  | 3137 | 3572 | 1879  | 75  |
| H(4)  | 1825 | 1999 | 2366  | 110 |
| H(5)  | 2357 | -162 | 2207  | 129 |
| H(6)  | 4243 | -738 | 1567  | 121 |
| H(7)  | 5555 | 840  | 1072  | 81  |
| H(8A) | 6725 | 5380 | 707   | 55  |
| H(8B) | 7061 | 6179 | 1233  | 55  |
| H(10) | 3920 | 6168 | 1754  | 62  |
| H(11) | 1414 | 7225 | 1648  | 71  |
| H(12) | 568  | 7934 | 806   | 78  |
| H(13) | 2247 | 7591 | 83    | 80  |

---



|        |       |      |      |     |
|--------|-------|------|------|-----|
| H(14)  | 4766  | 6561 | 192  | 67  |
| H(15)  | 7422  | 3099 | 1799 | 49  |
| H(17)  | 8727  | 1497 | 1332 | 54  |
| H(18)  | 10623 | 745  | 722  | 59  |
| H(20)  | 11500 | 4398 | 268  | 59  |
| H(21)  | 9653  | 5139 | 887  | 54  |
| H(22A) | 13091 | 455  | 287  | 129 |
| H(22B) | 13565 | 776  | -306 | 129 |
| H(22C) | 11724 | 432  | -167 | 129 |
| H(23A) | 9532  | 4376 | 2142 | 62  |
| H(23B) | 8907  | 5561 | 1802 | 62  |
| H(24A) | 8015  | 5873 | 2658 | 71  |
| H(24B) | 6436  | 5591 | 2302 | 71  |

---

**Supplementary Table 6.** Torsion angles [deg] for ljh041\_0m.

---

|                        |             |
|------------------------|-------------|
| C(8)-N(1)-C(1)-C(2)    | -158.92(14) |
| C(15)-N(1)-C(1)-C(2)   | 71.50(17)   |
| N(1)-C(1)-C(2)-C(3)    | 59.3(2)     |
| N(1)-C(1)-C(2)-C(7)    | -124.88(17) |
| C(7)-C(2)-C(3)-C(4)    | -0.8(3)     |
| C(1)-C(2)-C(3)-C(4)    | 175.09(18)  |
| C(2)-C(3)-C(4)-C(5)    | 0.2(3)      |
| C(3)-C(4)-C(5)-C(6)    | 0.6(4)      |
| C(4)-C(5)-C(6)-C(7)    | -0.8(4)     |
| C(3)-C(2)-C(7)-C(6)    | 0.7(3)      |
| C(1)-C(2)-C(7)-C(6)    | -175.21(18) |
| C(5)-C(6)-C(7)-C(2)    | 0.1(3)      |
| C(1)-N(1)-C(8)-C(9)    | 68.74(17)   |
| C(15)-N(1)-C(8)-C(9)   | -164.08(13) |
| N(1)-C(8)-C(9)-C(10)   | 47.7(2)     |
| N(1)-C(8)-C(9)-C(14)   | -132.94(16) |
| C(14)-C(9)-C(10)-C(11) | -0.6(3)     |
| C(8)-C(9)-C(10)-C(11)  | 178.80(16)  |

|                         |             |
|-------------------------|-------------|
| C(9)-C(10)-C(11)-C(12)  | 0.6(3)      |
| C(10)-C(11)-C(12)-C(13) | -0.2(3)     |
| C(11)-C(12)-C(13)-C(14) | -0.3(3)     |
| C(12)-C(13)-C(14)-C(9)  | 0.3(3)      |
| C(10)-C(9)-C(14)-C(13)  | 0.2(3)      |
| C(8)-C(9)-C(14)-C(13)   | -179.26(16) |
| C(1)-N(1)-C(15)-C(16)   | 61.96(16)   |
| C(8)-N(1)-C(15)-C(16)   | -64.84(17)  |
| C(1)-N(1)-C(15)-C(23)   | -168.99(13) |
| C(8)-N(1)-C(15)-C(23)   | 64.20(17)   |
| N(1)-C(15)-C(16)-C(17)  | -109.55(17) |
| C(23)-C(15)-C(16)-C(17) | 121.16(16)  |
| N(1)-C(15)-C(16)-C(21)  | 71.51(19)   |
| C(23)-C(15)-C(16)-C(21) | -57.77(19)  |
| C(21)-C(16)-C(17)-C(18) | -0.2(2)     |
| C(15)-C(16)-C(17)-C(18) | -179.18(14) |
| C(16)-C(17)-C(18)-C(19) | -0.7(2)     |
| C(22)-O(1)-C(19)-C(20)  | -177.83(17) |
| C(22)-O(1)-C(19)-C(18)  | 2.9(3)      |
| C(17)-C(18)-C(19)-O(1)  | -179.89(16) |
| C(17)-C(18)-C(19)-C(20) | 0.9(2)      |
| O(1)-C(19)-C(20)-C(21)  | -179.51(15) |

|                         |             |
|-------------------------|-------------|
| C(18)-C(19)-C(20)-C(21) | -0.2(3)     |
| C(19)-C(20)-C(21)-C(16) | -0.7(3)     |
| C(17)-C(16)-C(21)-C(20) | 0.9(2)      |
| C(15)-C(16)-C(21)-C(20) | 179.86(15)  |
| N(1)-C(15)-C(23)-C(24)  | 54.14(19)   |
| C(16)-C(15)-C(23)-C(24) | -174.32(14) |
| C(15)-C(23)-C(24)-C(25) | 65.6(2)     |
| C(23)-C(24)-C(25)-N(2)  | 46(8)       |

---
